# Supplementary material
Source: publisher figshare collection journal article supplement (https://acs.figshare.com/ndownloader/files/34410181)
Supplement: Supplementary file 1 [file 34410181]

## Supporting Information

# Synthesis of 5-Fluoro-dihydroindolizines from Pyrrole-2-Acetic Acids and Trifluoromethyl Alkenes via Dual C-F Bond Cleavage in a CF<sub>3</sub> Group

Zhengchang Sun and Lei Zhou\*

School of Chemistry, Sun Yat-Sen University, Guangzhou, 510006, China.

*E-mail: zhoul39@mail.sysu.edu.cn*

## Table of Contents

|                                                                                                                |       |
|----------------------------------------------------------------------------------------------------------------|-------|
| 1. General procedures for the synthesis of <b>1</b> .....                                                      | S2    |
| 2. Table S1: Optimization conditions for intramolecular S <sub>N</sub> V reaction of <b>3a</b> .....           | S3    |
| 3. Cyclic Voltammetry Data.....                                                                                | S4    |
| 4. HRMS spectrum of pyrrole-2-methyl-TMEPO adduct.....                                                         | S5    |
| 5. Light source and apparatus.....                                                                             | S5-6  |
| 6. Copies of <sup>1</sup> H, <sup>19</sup> F and <sup>13</sup> C{ <sup>1</sup> H} NMR spectra of products..... | S7-86 |

## 1. General procedures for the synthesis of pyrrole-2-acetic acids and indole-2-acetic acids 1

All the pyrrole-2-acetic acids and indole-2-acetic acids are commercially available reagents, but are very expensive. Therefore, they were prepared from the corresponding pyrroles and indoles *via* radical alkylation followed by hydrolysis according to the modified procedure of Zard (Huang, Q.; Zard, S. Z. *Org. Lett.* **2018**, *20*, 1413–1416).

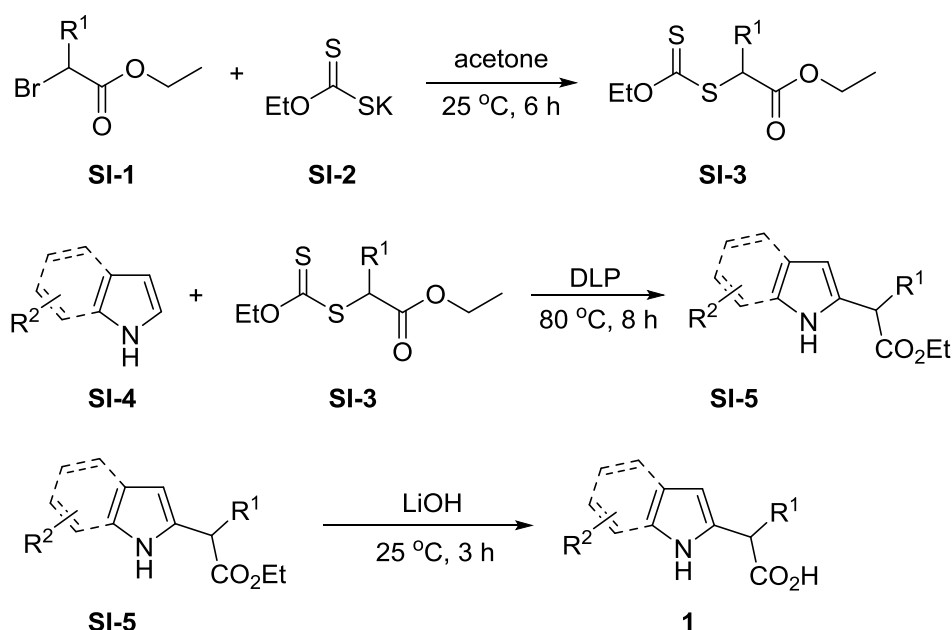

**Synthesis of Xantate SI-3:** To a 250 mL round flask was added  $\alpha$ -bromo acetate **SI-1** (20 mmol) and acetone (100 mL). Then the potassium ethyl xanthogenate **SI-2** (4 g, 25 mmol) was added in portions at 0 °C, then the solution was allowed to stir at room temperature for 6 h. After completion of the reaction, the reaction mixture was evaporated under reduced pressure, then dissolved with water (75 mL) and extracted with dichloromethane ( $3 \times 75$  mL). The organic layer was washed with brine, dried over anhydrous  $\text{Na}_2\text{SO}_4$  and evaporated under reduced pressure to give Xantate **SI-3** as yellow oil, which can be used for the next step of reaction without further purification.

**Radical alkylation of pyrroles or indoles using Xantate SI-3:** A solution of **SI-4** (10 mmol) and Xantate **SI-3** (12.5 mmol) in a 1,2-dichloroethane (20 mL) was refluxed in

a heating mantle under nitrogen for 10 min. The dilauroyl peroxide (DLP, 4.98 g, 12.5 mmol) was dissolved in 1,2-dichloroethane (30 mL) and added by dropwise for a period of 5 h. After addition, the solution was stirred for additional 2 h. Then the reaction mixture was cooled down to room temperature, concentrated under reduced pressure and purified by flash chromatography (petroleum ether: ethyl acetate = 25:1) on silica gel to provide esters **SI-5**.

Hydrolysis of esters **SI-5**: LiOH (240 mg, 10 mmol) dissolved in water (15 mL) was added to the THF (15 mL) solution of ester **SI-5** (5 mmol) in a 50 mL round bottom flask. The mixture stirred rapidly at room temperature for 3 h. Upon completion of the reaction, as monitored by TLC, the solution was neutralized with HCl (1 mol/L) to PH = 2 and extracted with Et<sub>2</sub>O (3x40ml). The organic layer was dried over anhydrous Na<sub>2</sub>SO<sub>4</sub> and evaporated under reduced pressure to afford the corresponding pure acids as white solid, which can be used directly without further purification.

## 2. Table S1. Optimization conditions for intramolecular S<sub>N</sub>V reaction of **3a**<sup>a</sup>

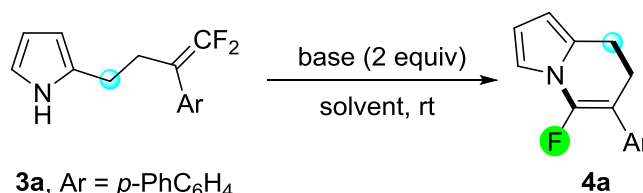

| entry | base                            | solvent | time (h) | Yield (%) <sup>b</sup> |
|-------|---------------------------------|---------|----------|------------------------|
| 1     | NaOH                            | DMSO    | 4        | 67                     |
| 2     | K <sub>3</sub> PO <sub>4</sub>  | DMF     | 12       | 0                      |
| 3     | Na <sub>2</sub> CO <sub>3</sub> | DMF     | 12       | 0                      |
| 4     | <i>t</i> BuOLi                  | DMF     | 4        | 34                     |
| 5     | DBU                             | DMF     | 4        | <5                     |
| 6     | NaH                             | DMF     | 1        | 60                     |
| 7     | NaOH                            | DMF     | 1        | 89                     |

<sup>a</sup> Reaction conditions: **3a** (0.2 mmol), base (2 equiv), solvent (1.5 mL), rt. <sup>b</sup> Isolated yields.

### 3. Cyclic voltammetry measurement

Cyclic voltammogram was recorded on a CHI750E Electrochemical Analyzer using a three-electrode cell at room temperature. Electrochemical potentials were obtained with a standard set of conditions to main internal consistency. Cyclic voltammograms were collected with a potentiostat. A glassy carbon electrode was used as the working electrode and a platinum wire as the auxiliary electrode. The reference electrode was a saturated Ag/AgCl electrode. Lithium perchlorate was used as the supporting electrolyte. Samples were prepared by dissolving 1 mmol of **1a**, 2 mmol of DABCO and LiClO<sub>4</sub> (1 mmol) in 5 mL of anhydrous DMSO and purged with nitrogen.

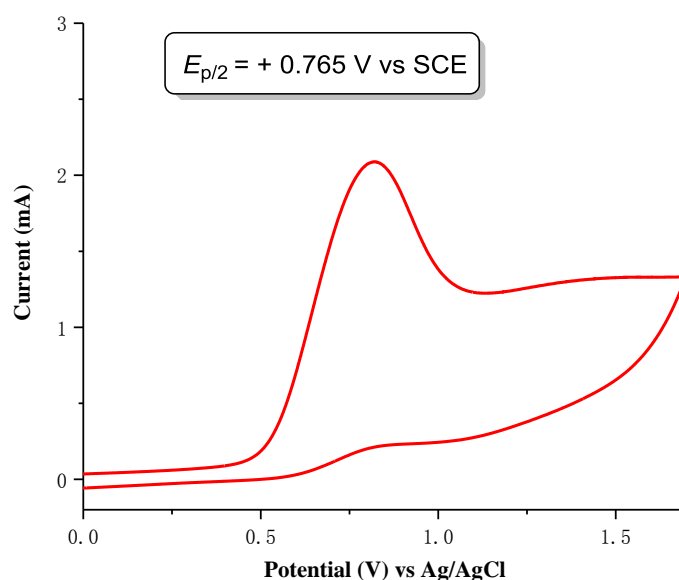

**Figure S1.** Cyclic voltammogram of pyrrole-2-acetic acid **1a** in the presence of DABCO in DMSO.

As shown in Figure S1, in the presence of base, the carboxylate form of **1a** showed an irreversible oxidation peak at +0.808 V. The value for  $E_{p/2}$  was referenced to SCE (Saturated Calomel Electrode) by reducing 0.043 V to the measured potential.



#### 4. HRMS spectrum of pyrrole-2-methyl-TMEPO adduct

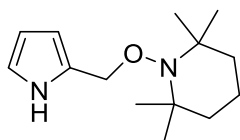

HRMS (ESI) Calcd for  $C_{14}H_{25}N_2O$   $[M+H]^+$  237.1961, found: 237.1958.

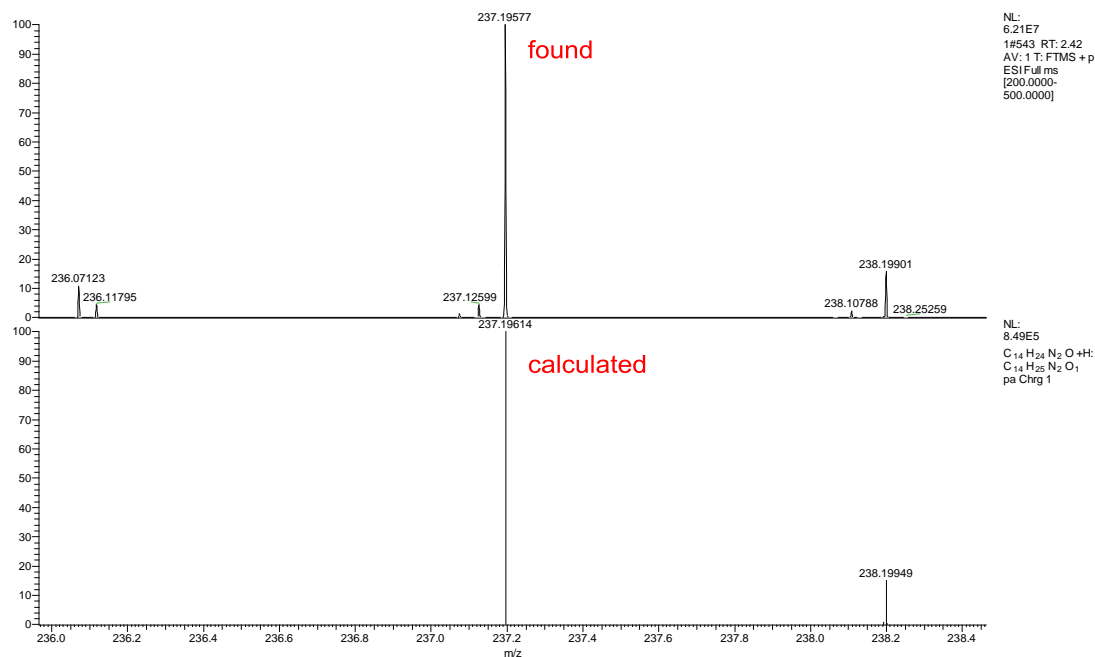

**Figure S2.** HRMS spectrum of pyrrole-2-methyl-TMEPO adduct.

#### 5. Light source and apparatus

The reactions were performed using RLH-18 8-position Photo Reaction System, which manufactured by Beijing Rogertech Co. Ltd based in Beijing, China (<http://www.rogertech.cn/>). This Photo reactor are equipped with eight 10 W blue light LEDs, and their power can be tuned by connecting a controller.

The emission spectrum of blue LEDs is about 416 to 510 nm, and its  $\lambda_{\max}$  is 453.6 nm. The strength of irradiation @5 W is about 246 mW/cm<sup>2</sup>.

Irradiation vessel is borosilicate glass test tube. The reaction was irradiated through a high-reflection channel from blue LED to the test tube, which length is 2 cm without any filters.

The emission spectrum of the light source and the picture of the apparatus are shown below:

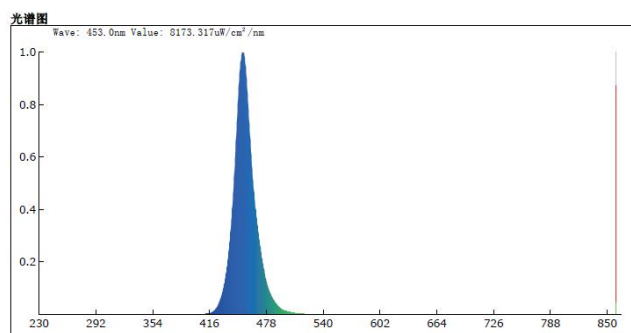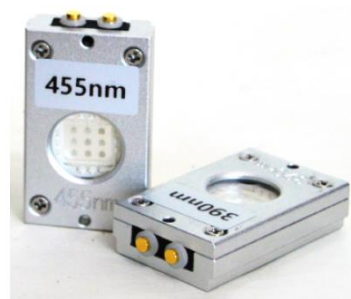

**Scheme S1.** The emission spectrum of the light source

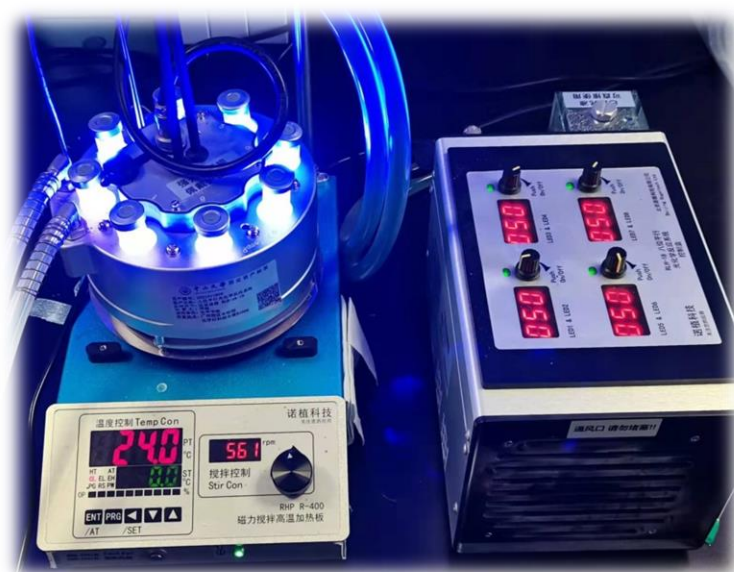

**Scheme S2.** The picture of apparatus.

## 6. Copies of $^1\text{H}$ , $^{19}\text{F}$ , $^{13}\text{C}\{^1\text{H}\}$ NMR spectra of products

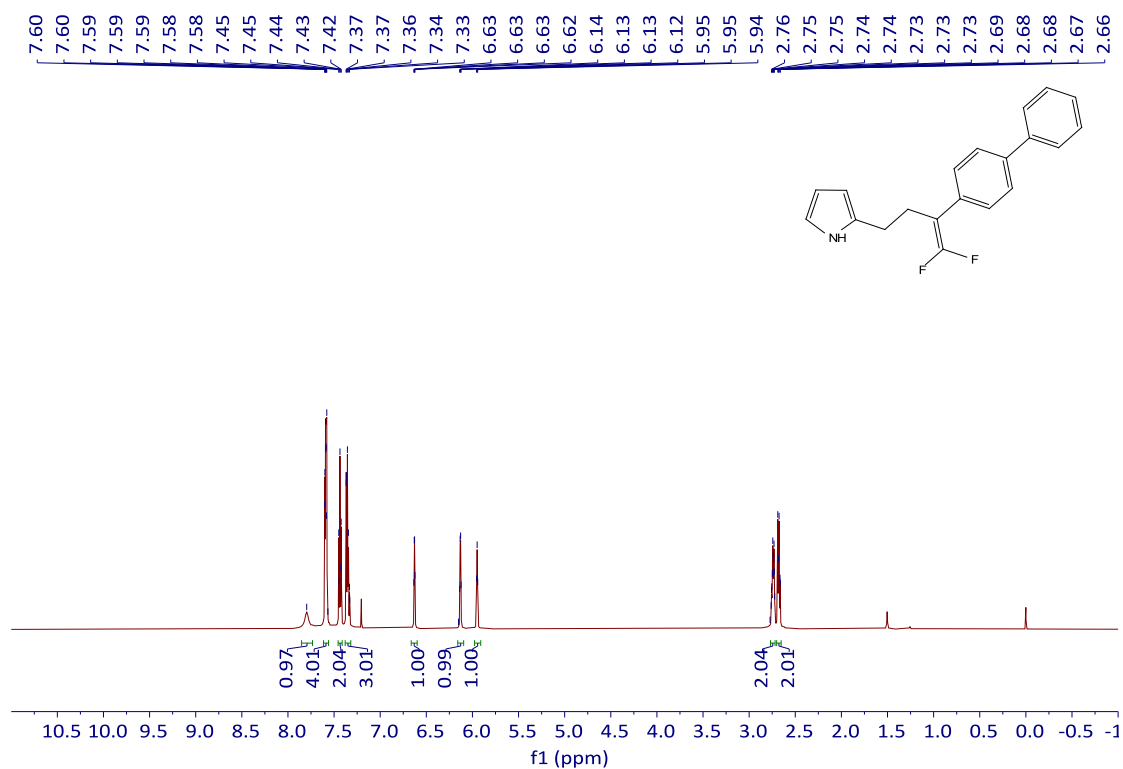

$^1\text{H}$  NMR of **3a** (400 Hz,  $\text{CDCl}_3$ )

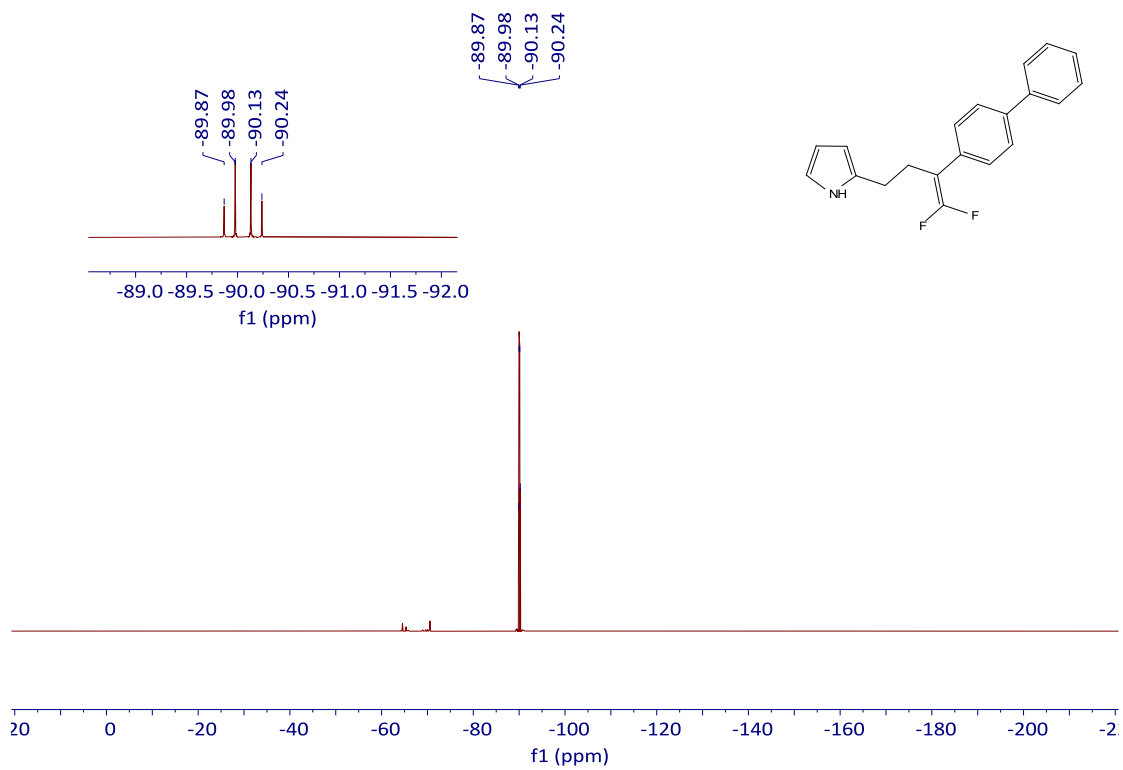

$^{19}\text{F}$  NMR of **3a** (376 Hz,  $\text{CDCl}_3$ )

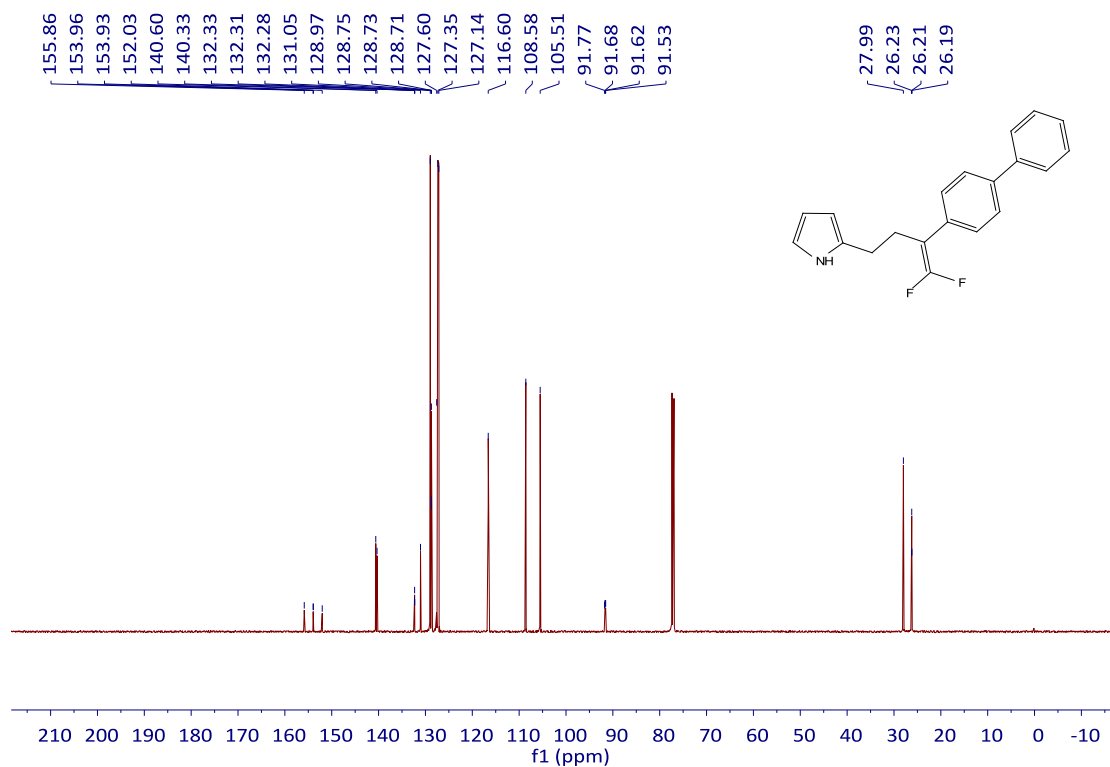

$^{13}\text{C}\{^1\text{H}\}$  NMR of **3a** (150 Hz,  $\text{CDCl}_3$ )

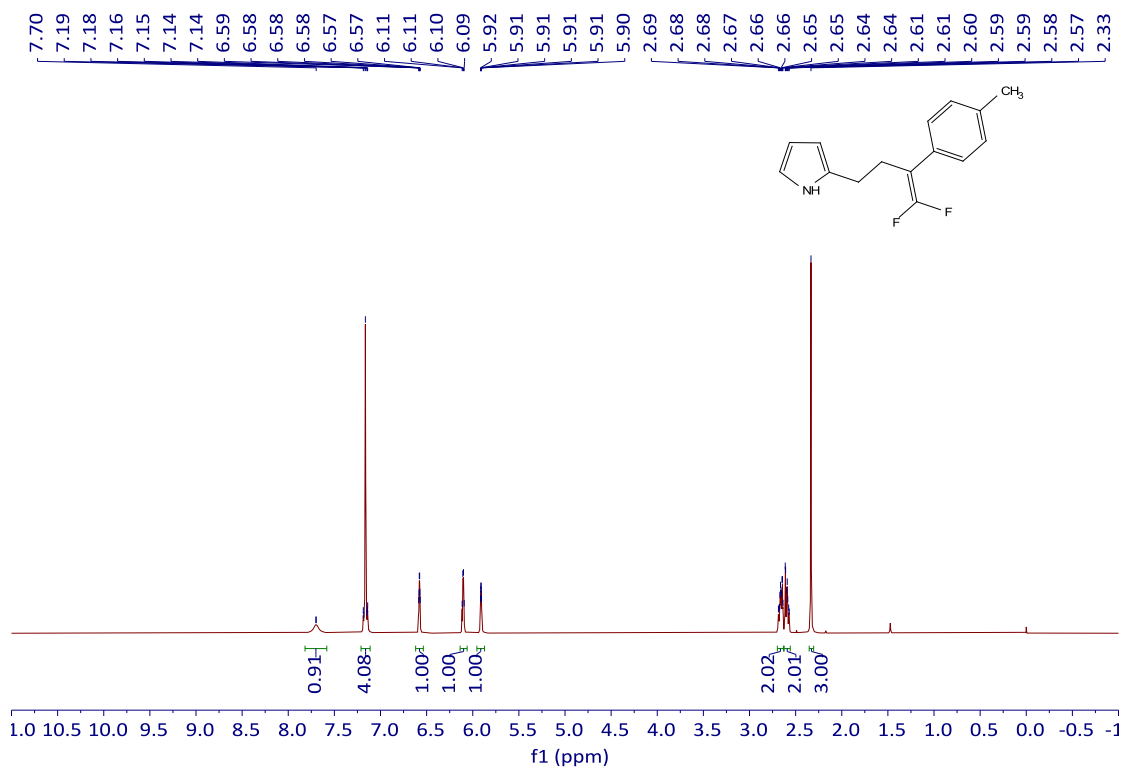

$^1\text{H}$  NMR of **3b** (400 Hz,  $\text{CDCl}_3$ )

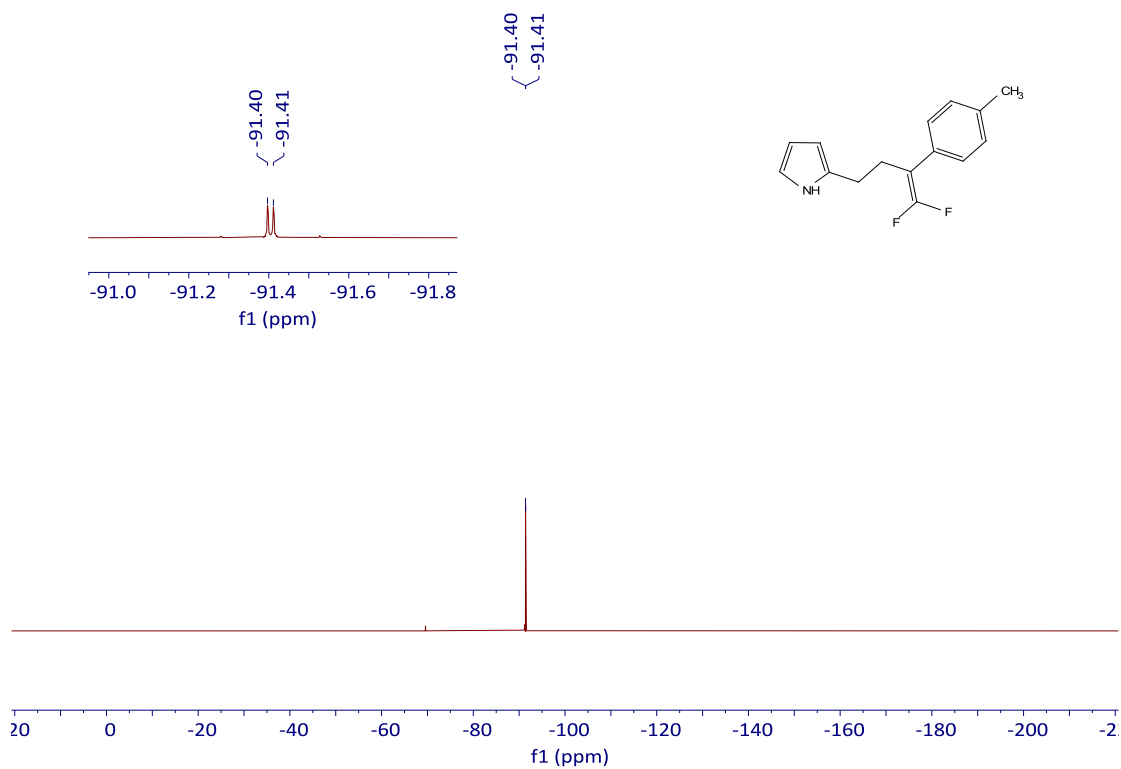

$^{19}\text{F}$  NMR of **3b** (376 Hz,  $\text{CDCl}_3$ )

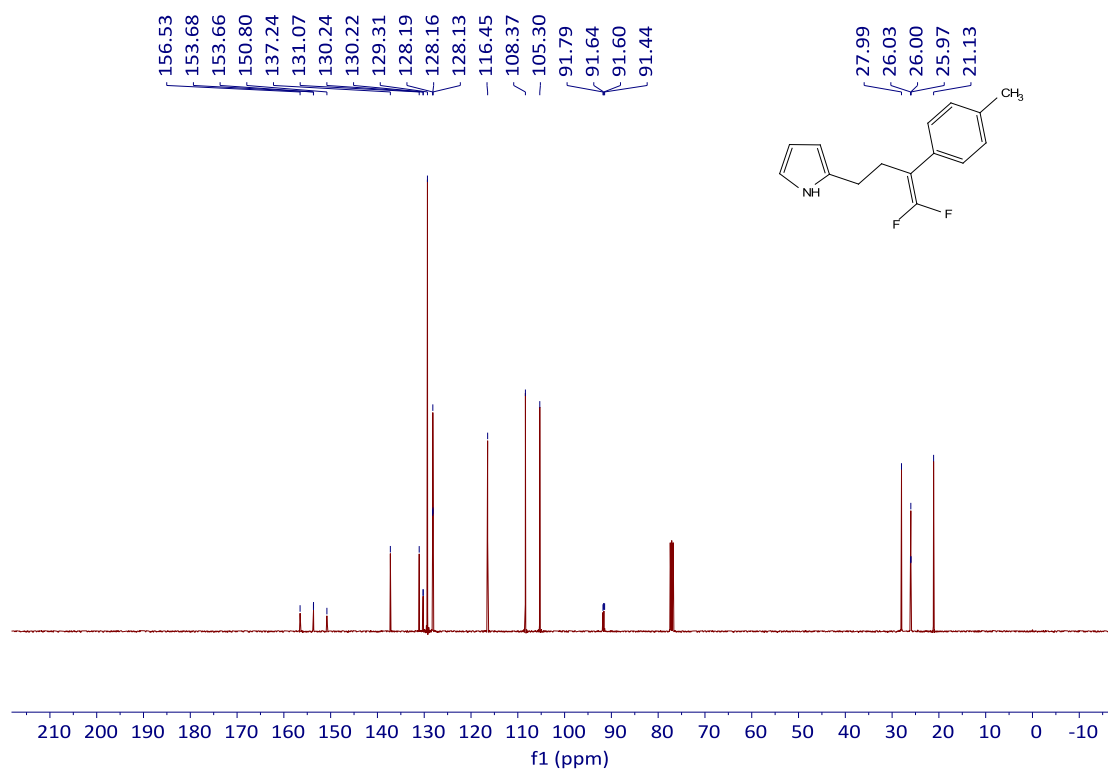

$^{13}\text{C}\{^1\text{H}\}$  NMR of **3b** (100 Hz,  $\text{CDCl}_3$ )

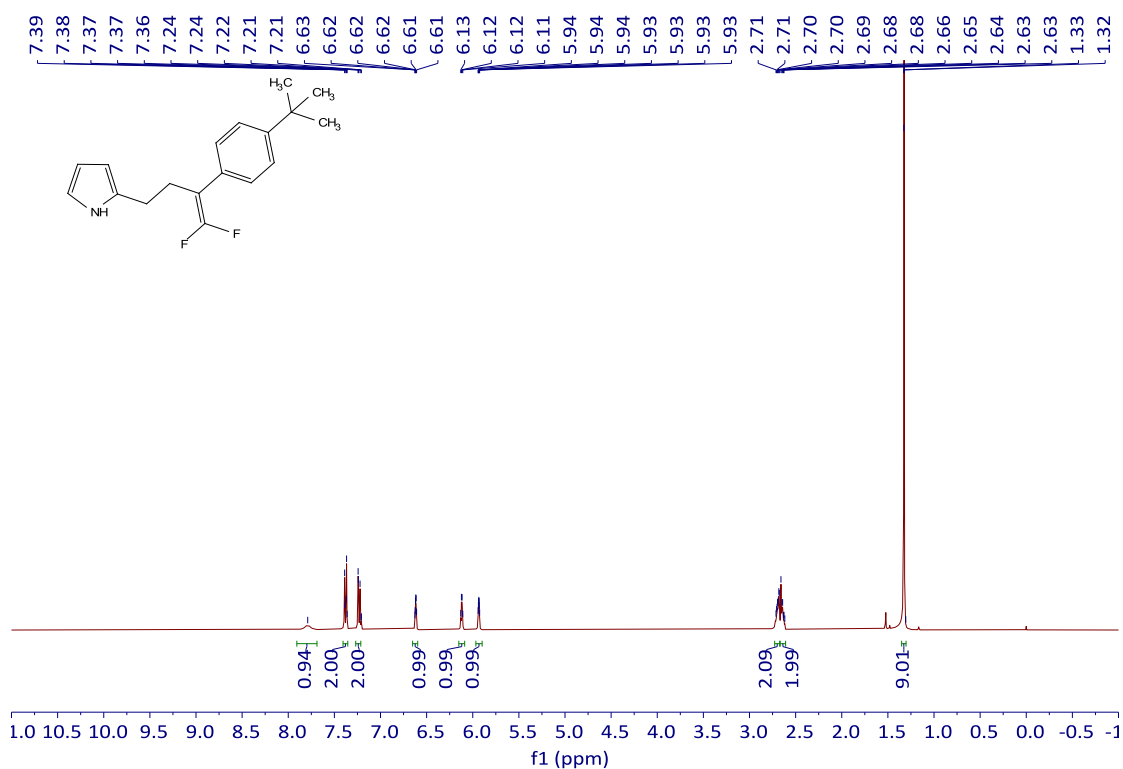

<sup>1</sup>H NMR of **3c** (400 Hz, CDCl<sub>3</sub>)

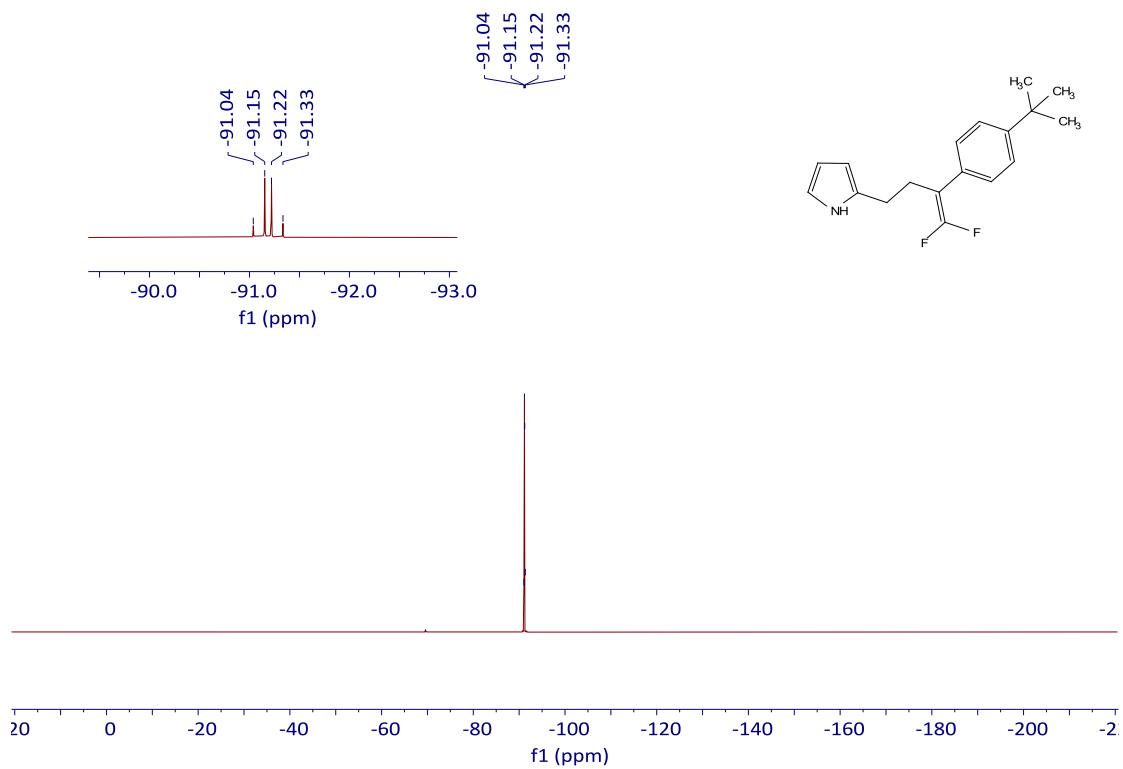

<sup>19</sup>F NMR of **3c** (376 Hz, CDCl<sub>3</sub>)

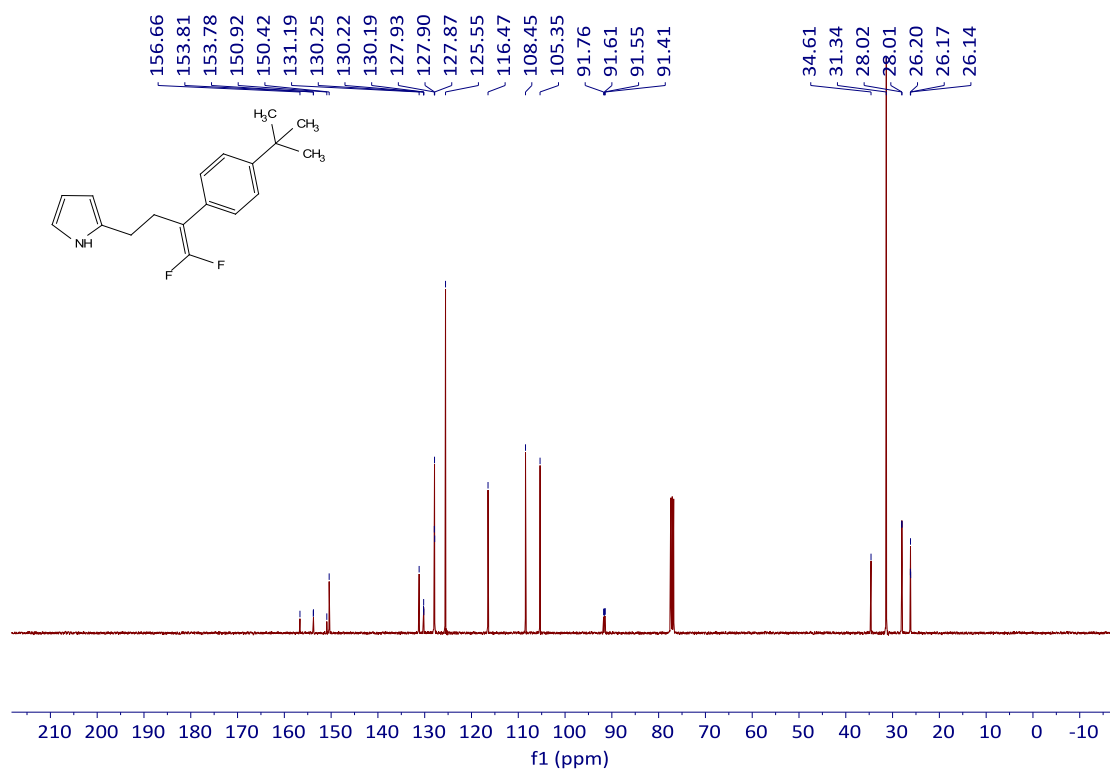

<sup>13</sup>C{<sup>1</sup>H} NMR of **3c** (100 Hz, CDCl<sub>3</sub>)

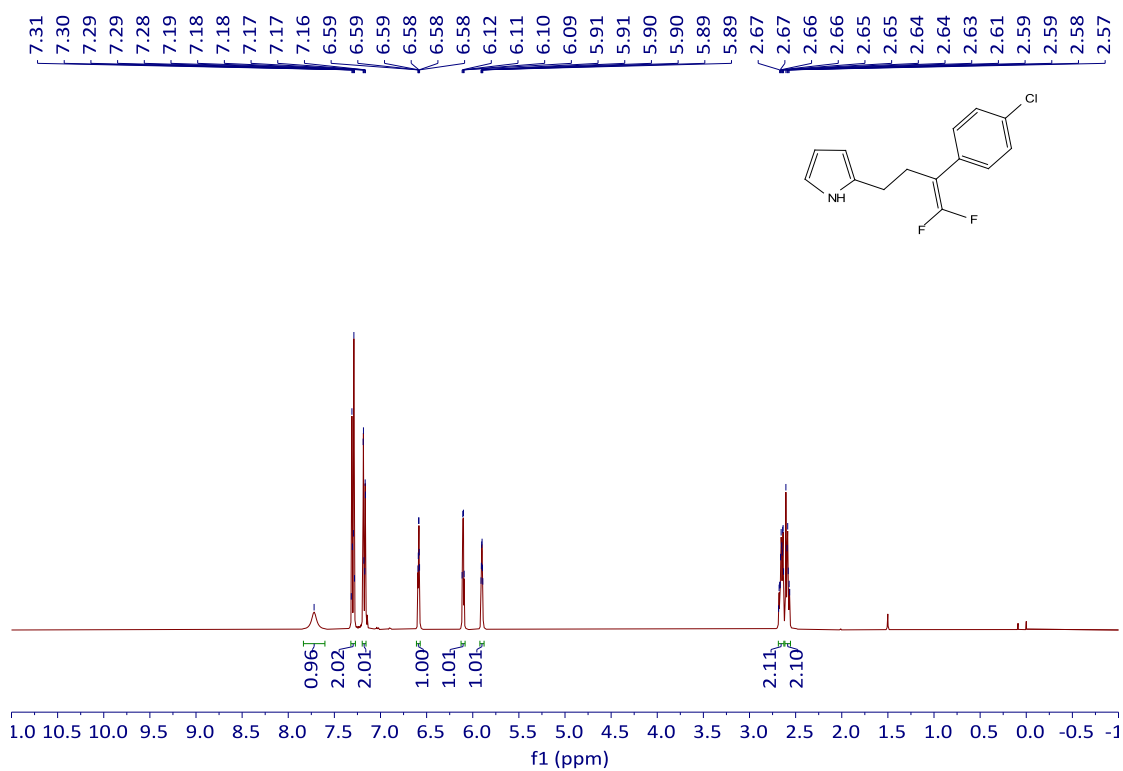

<sup>1</sup>H NMR of **3d** (400 Hz, CDCl<sub>3</sub>)

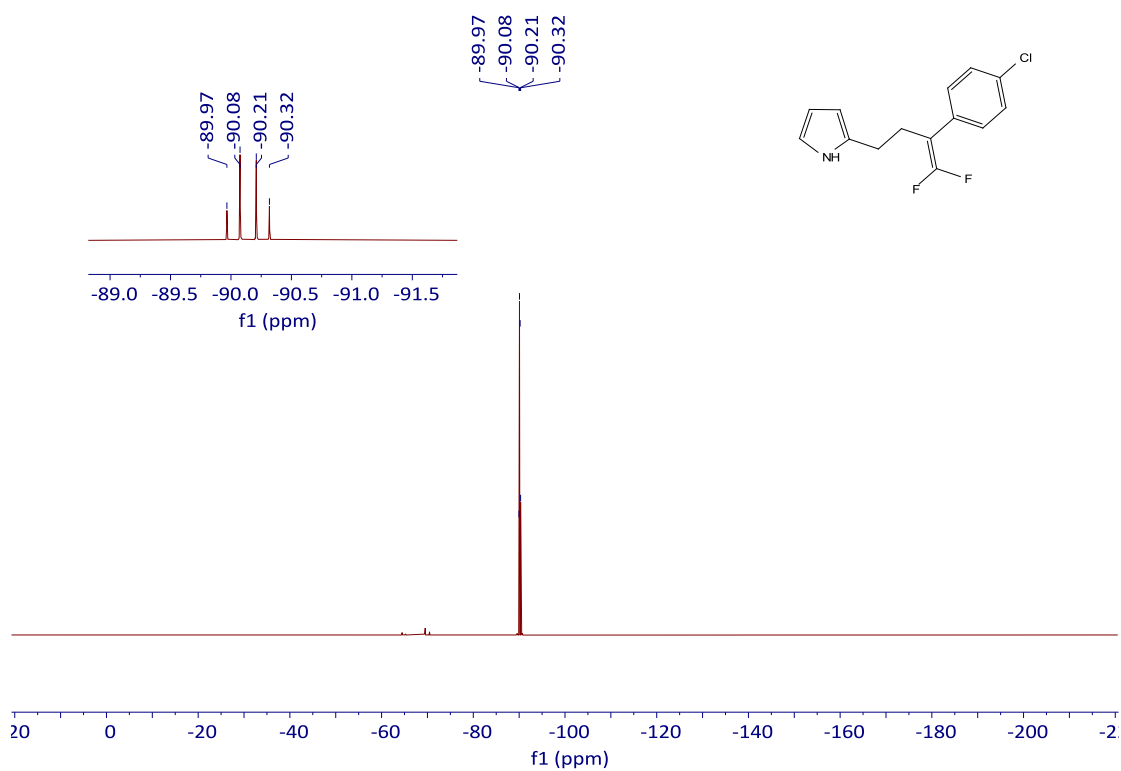

<sup>19</sup>F NMR of **3d** (376 Hz, CDCl<sub>3</sub>)

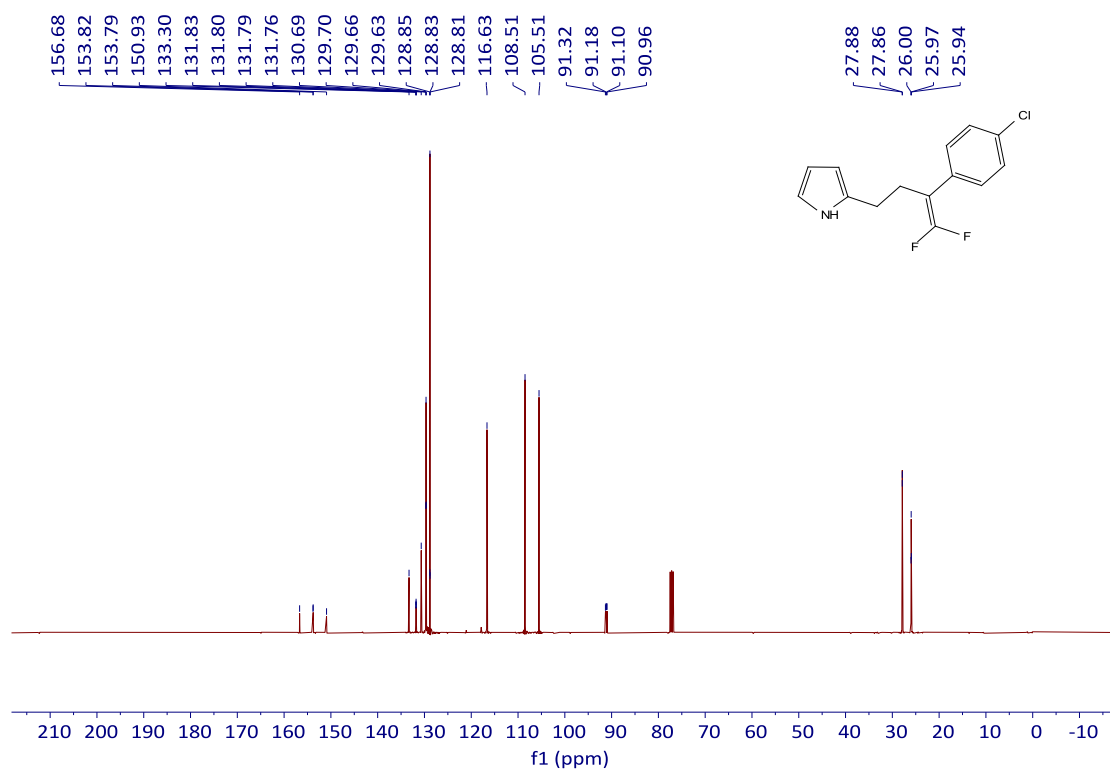

<sup>13</sup>C{<sup>1</sup>H} NMR of **3d** (100 Hz, CDCl<sub>3</sub>)



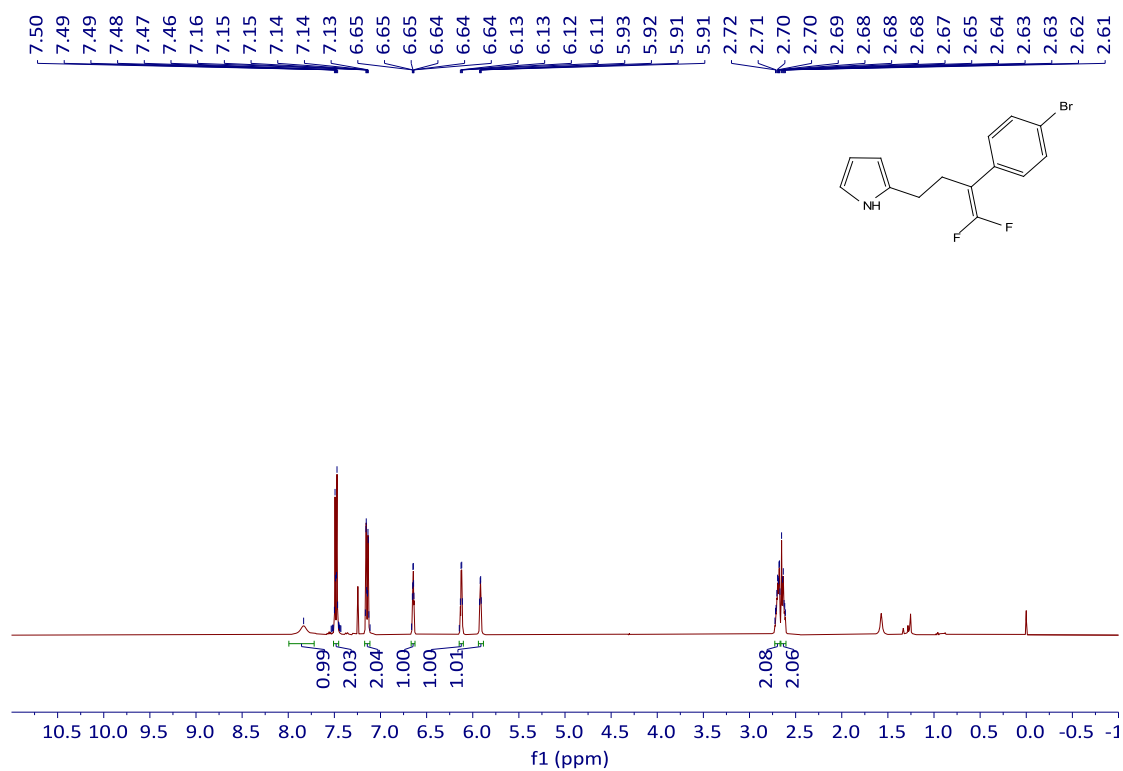

<sup>1</sup>H NMR of **3e** (400 Hz, CDCl<sub>3</sub>)

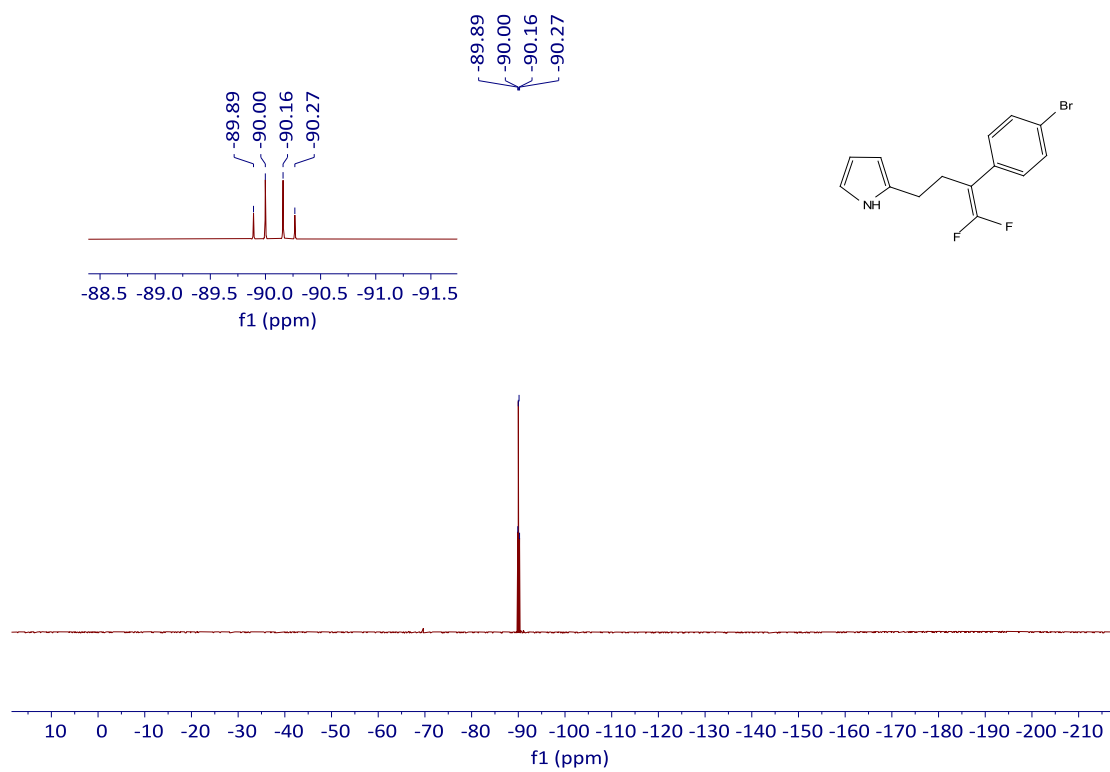

<sup>19</sup>F NMR of **3e** (376 Hz, CDCl<sub>3</sub>)

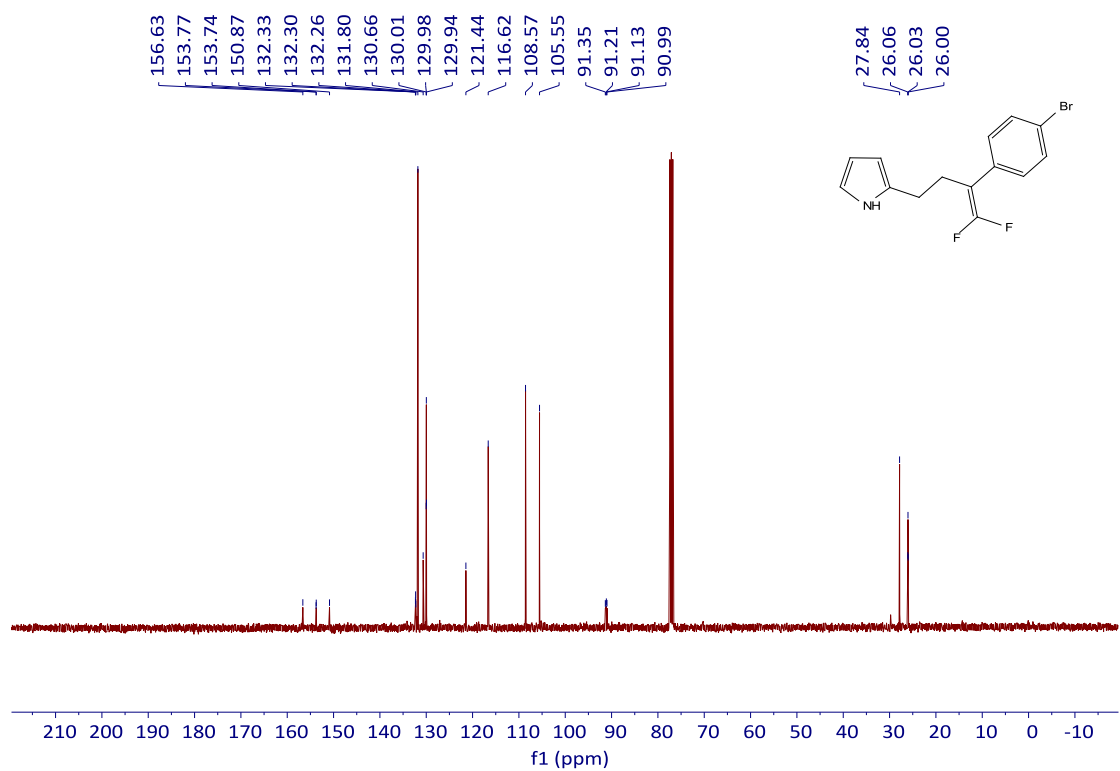

<sup>13</sup>C{<sup>1</sup>H} NMR of **3e**(100 Hz, CDCl<sub>3</sub>)

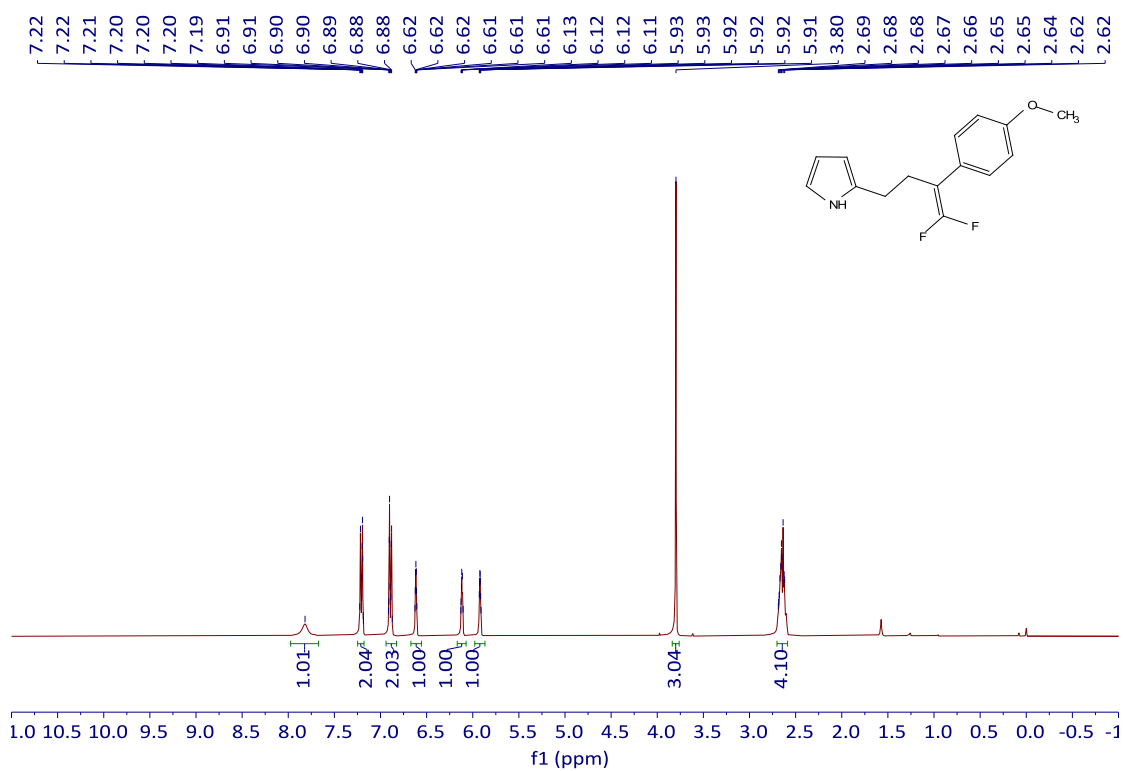

<sup>1</sup>H NMR of **3f** (400 Hz, CDCl<sub>3</sub>)

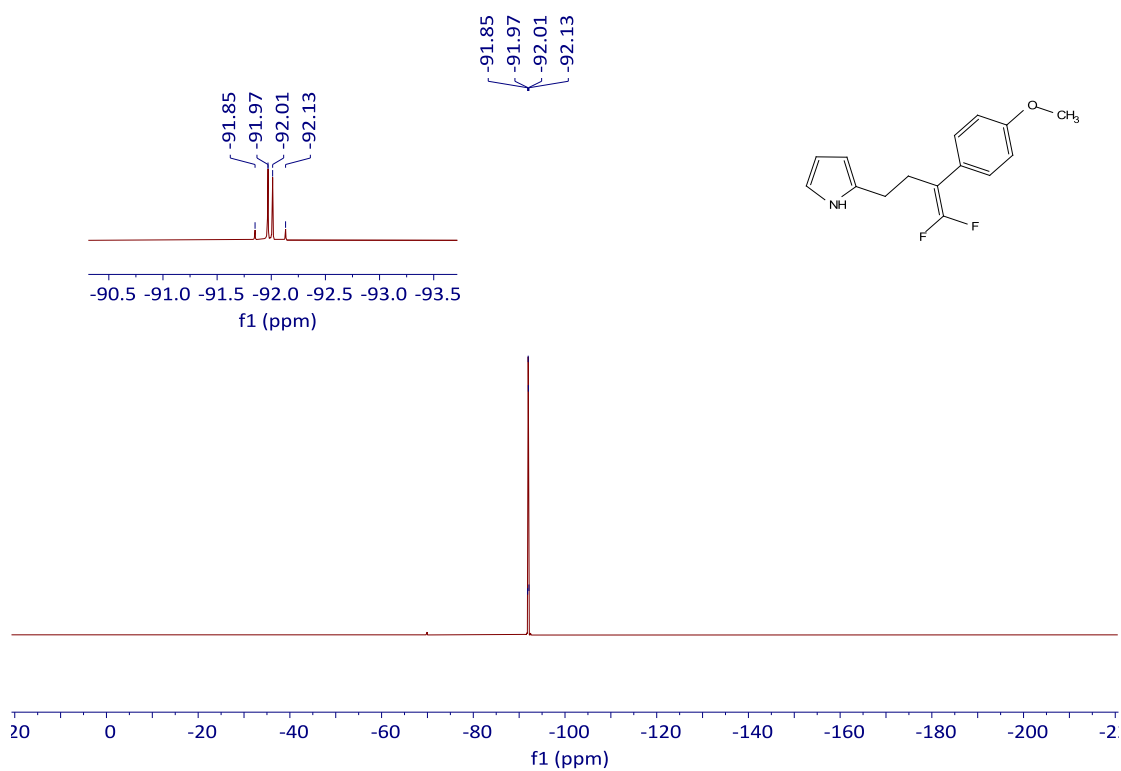

<sup>19</sup>F NMR of **3f** (376 Hz, CDCl<sub>3</sub>)

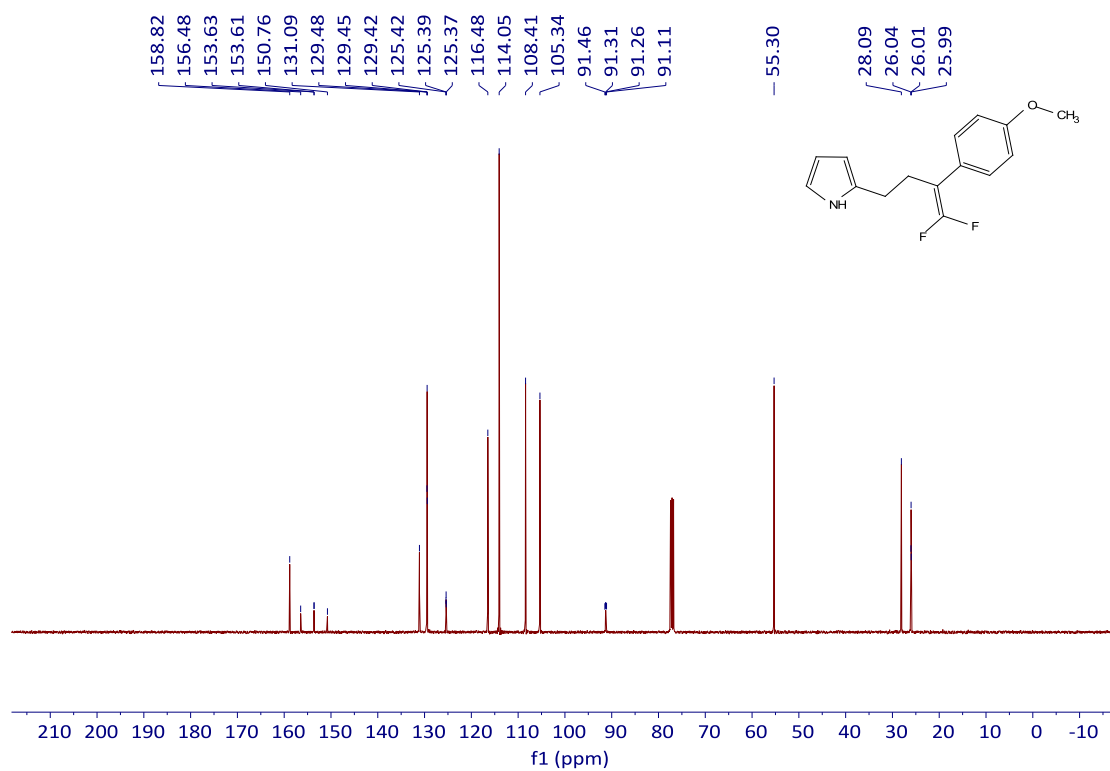

<sup>13</sup>C{<sup>1</sup>H} NMR of **3f** (100 Hz, CDCl<sub>3</sub>)

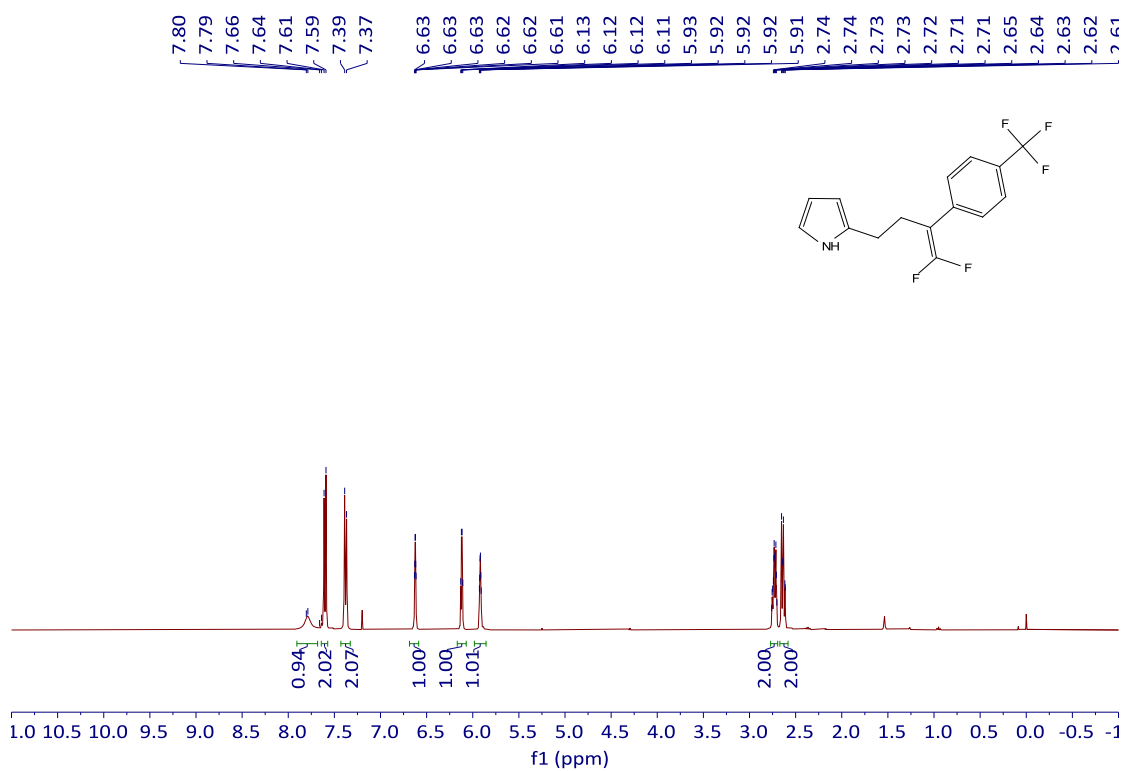

<sup>1</sup>H NMR of **3g** (400 Hz, CDCl<sub>3</sub>)

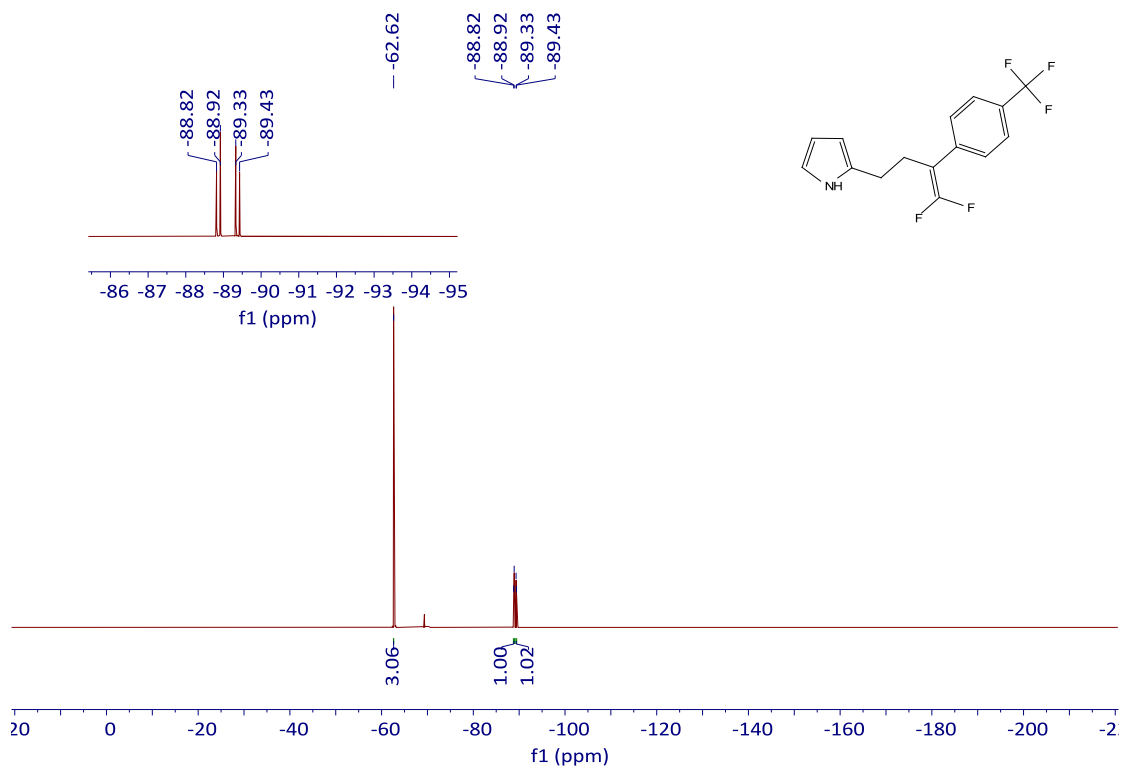

<sup>19</sup>F NMR of **3g** (376 Hz, CDCl<sub>3</sub>)

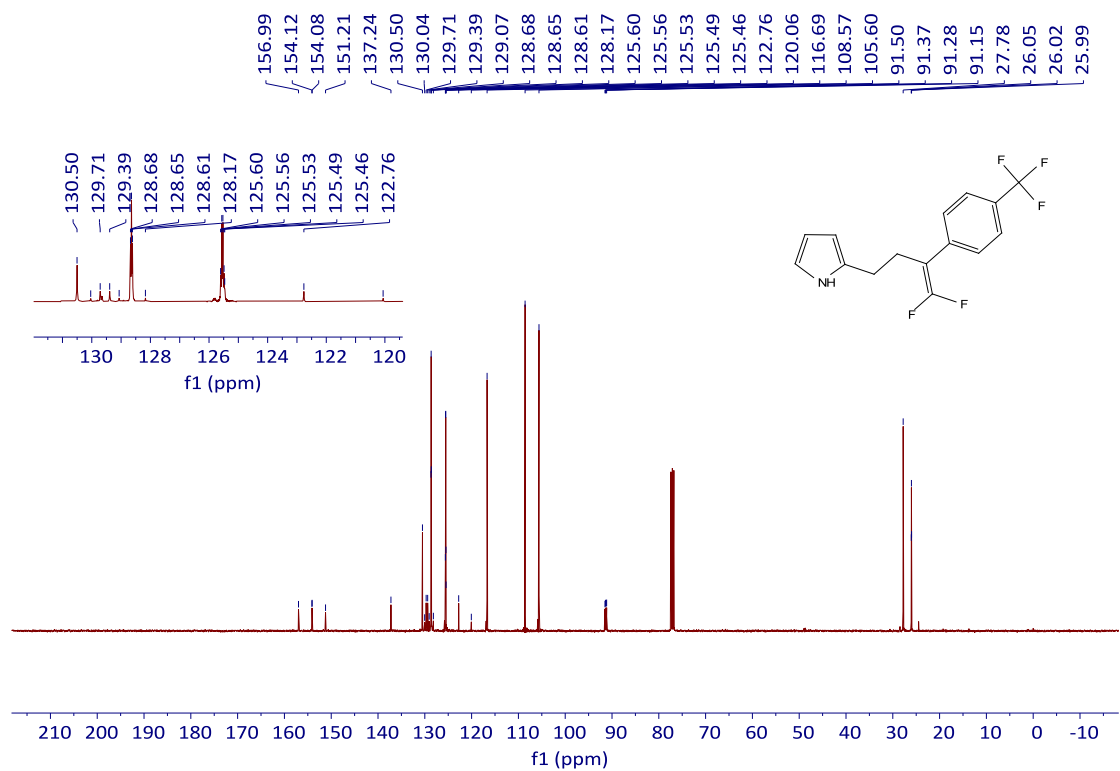

<sup>13</sup>C{<sup>1</sup>H} NMR of **3g** (100 Hz, CDCl<sub>3</sub>)

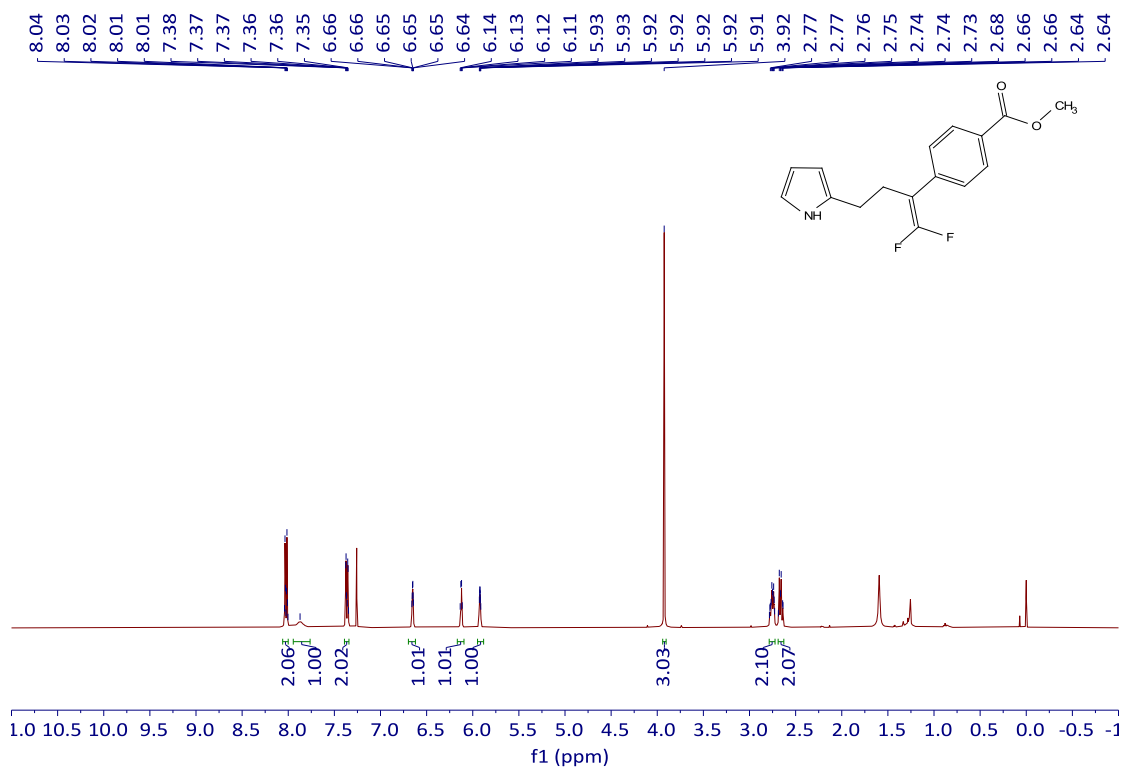

<sup>1</sup>H NMR of **3h** (400 Hz, CDCl<sub>3</sub>)

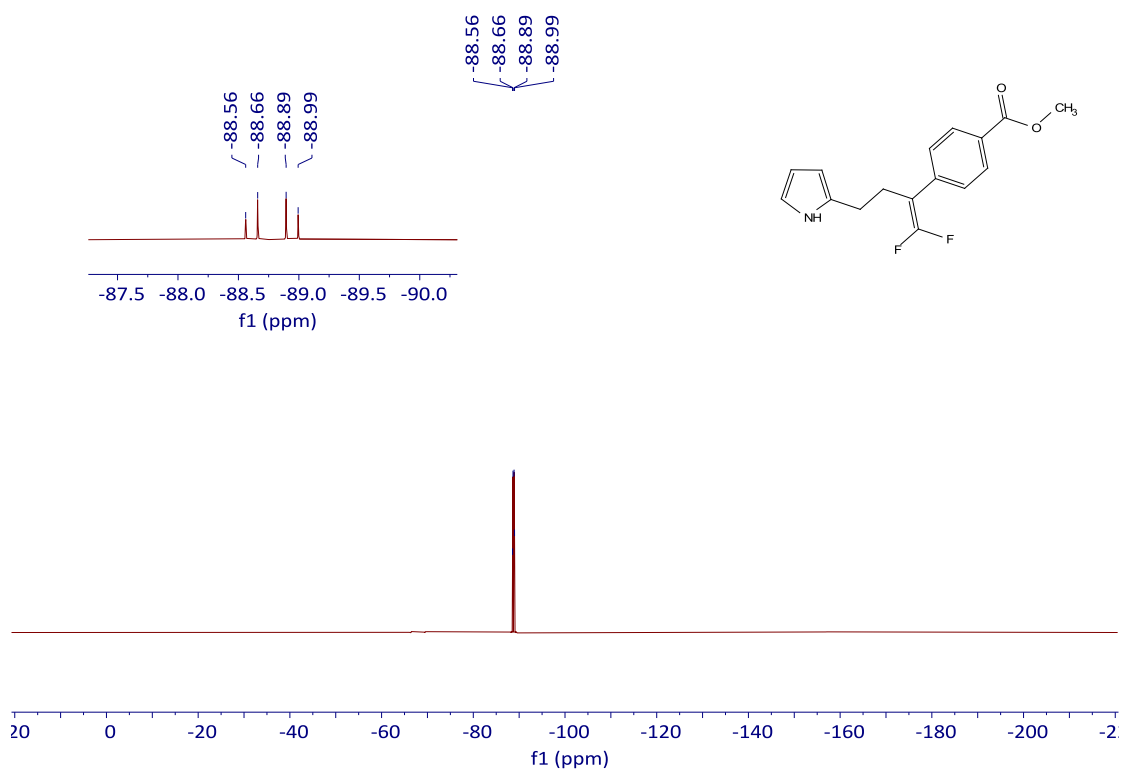

<sup>19</sup>F NMR of **3h** (376 Hz, CDCl<sub>3</sub>)

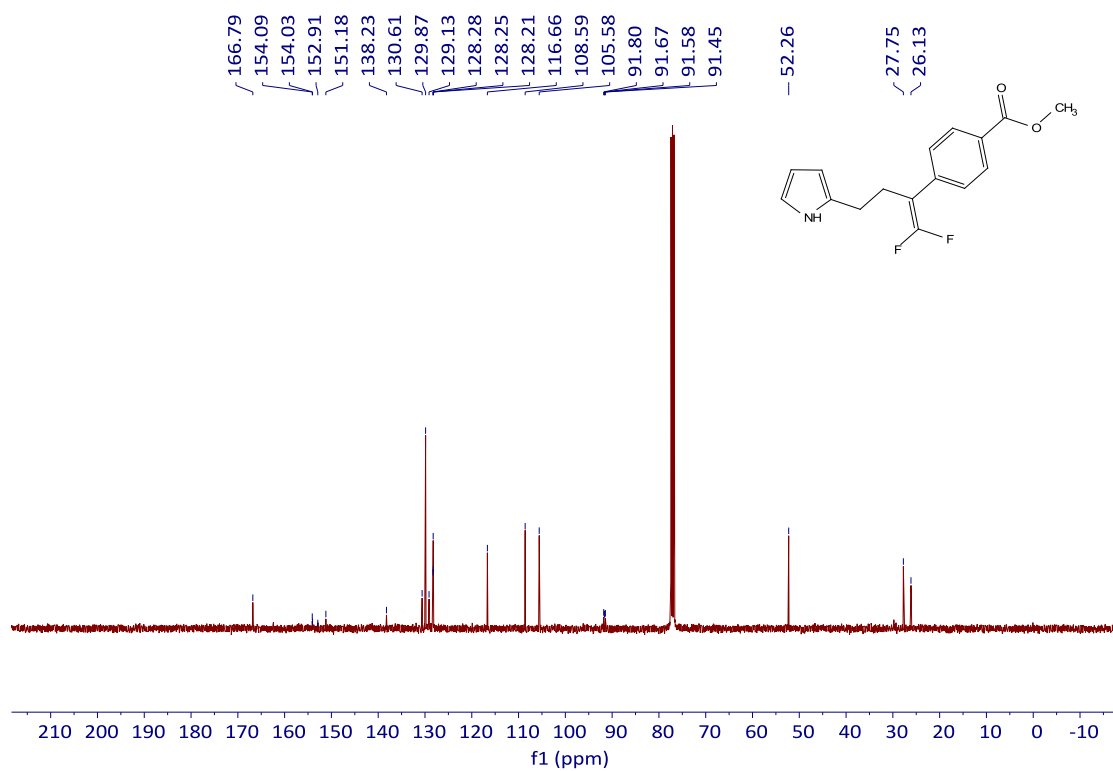

<sup>13</sup>C{<sup>1</sup>H} NMR of **3h** (100 Hz, CDCl<sub>3</sub>)

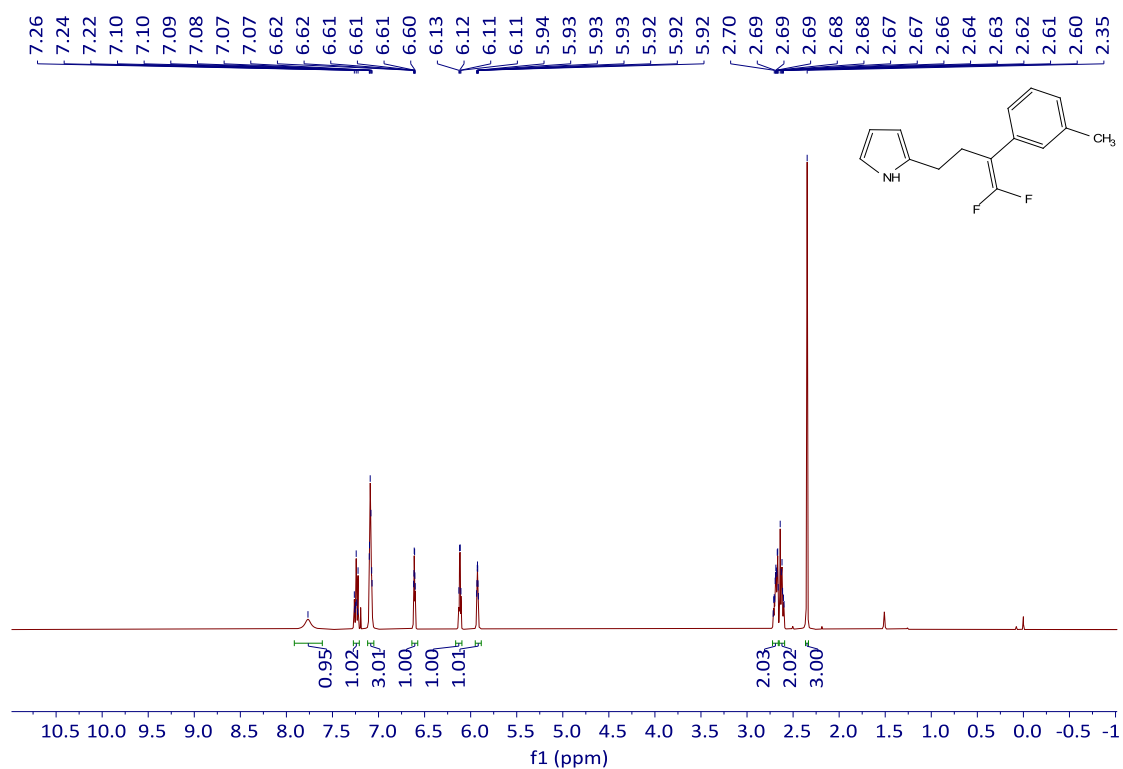

<sup>1</sup>H NMR of **3i** (400 Hz, CDCl<sub>3</sub>)

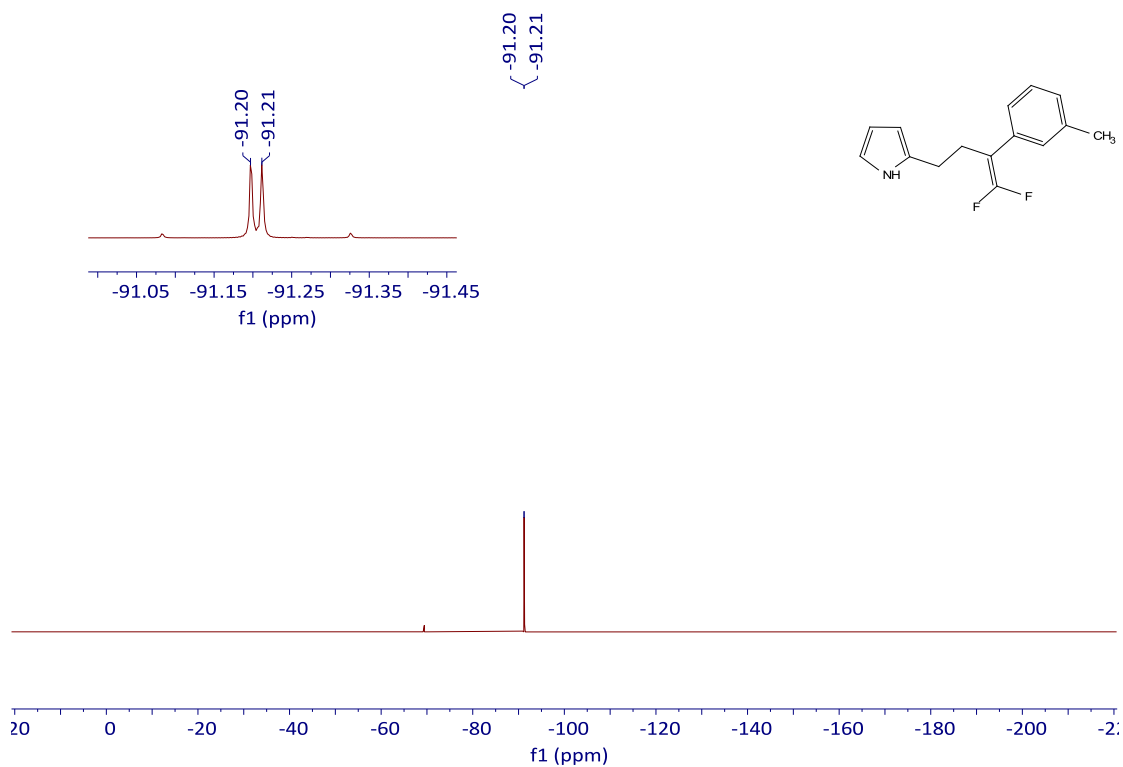

<sup>19</sup>F NMR of **3i** (376 Hz, CDCl<sub>3</sub>)

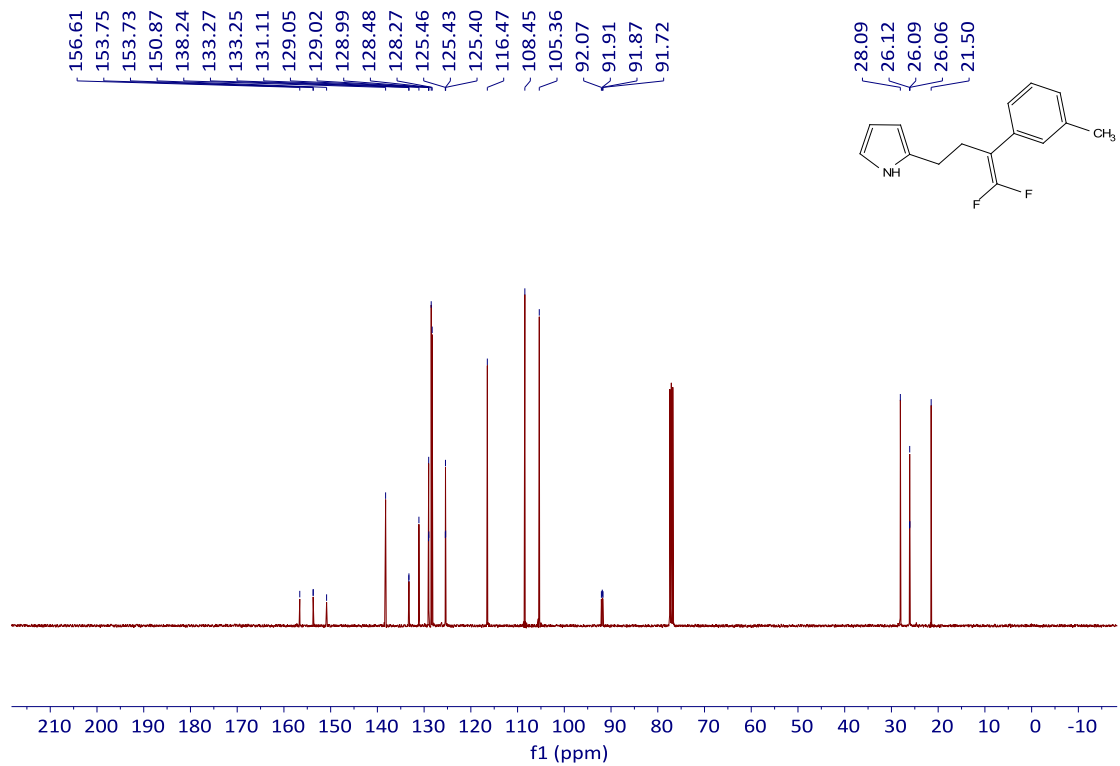

<sup>13</sup>C{<sup>1</sup>H} NMR of **3i** (100 Hz, CDCl<sub>3</sub>)

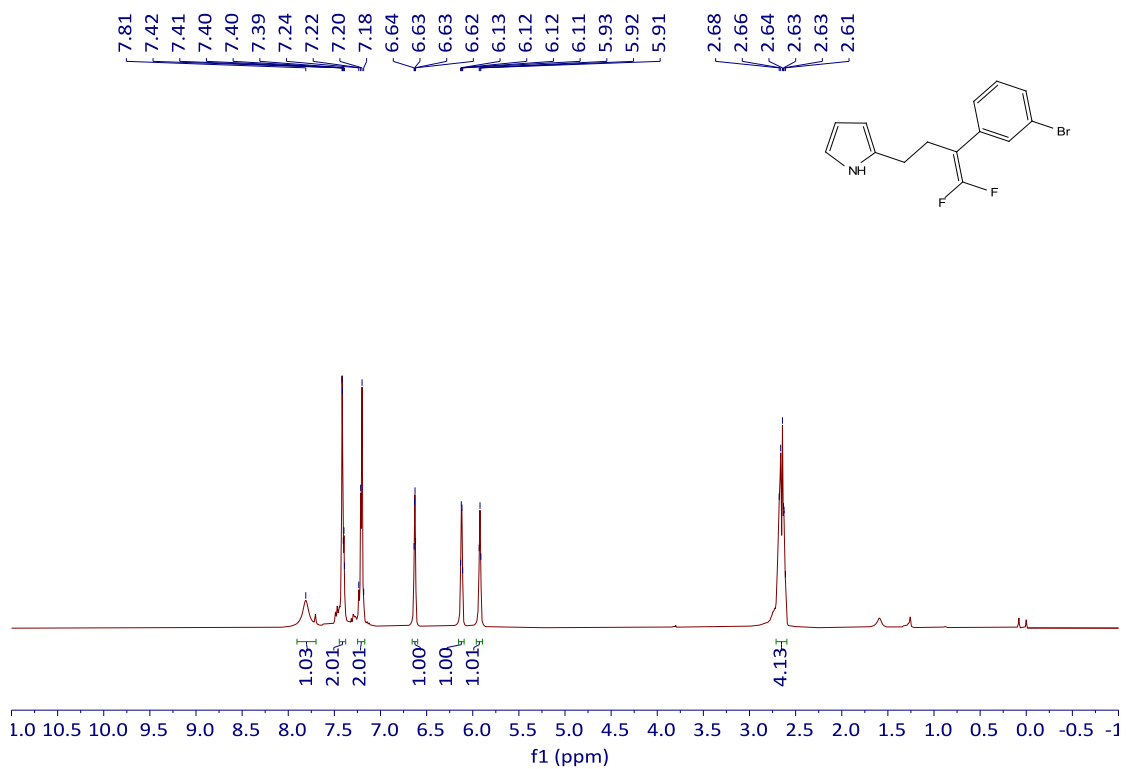

<sup>1</sup>H NMR of **3j** (400 Hz, CDCl<sub>3</sub>)



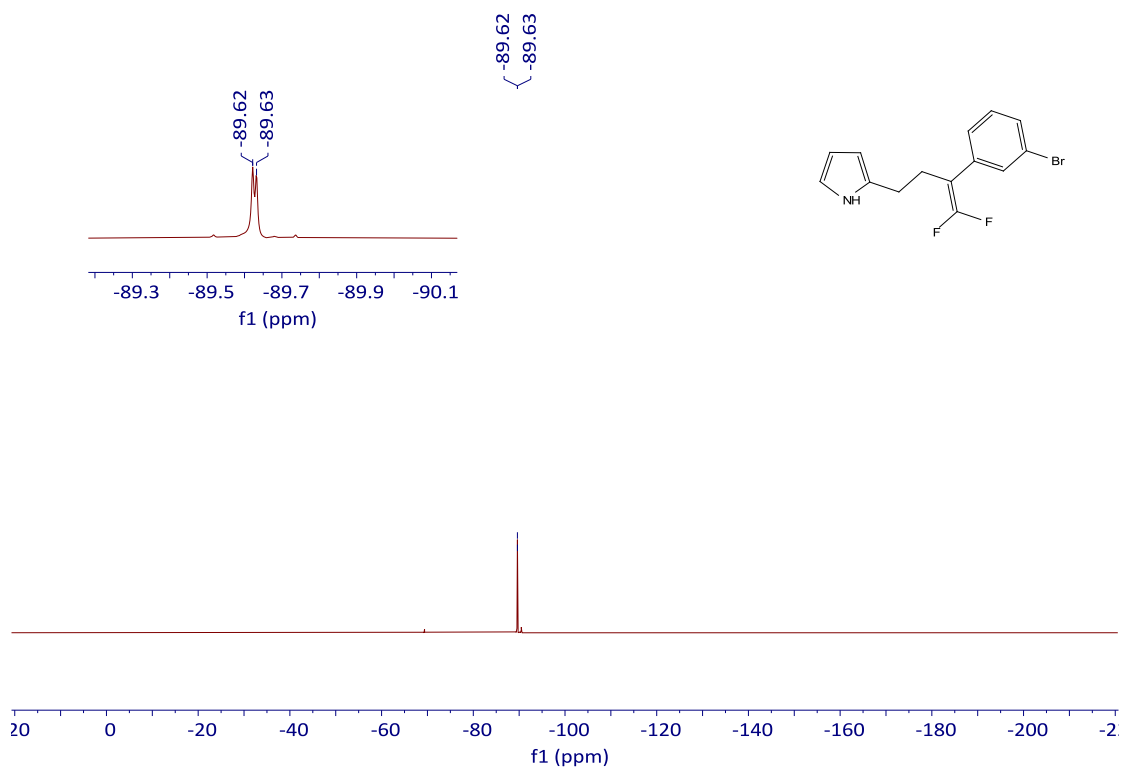

<sup>19</sup>F NMR of **3j** (376 Hz, CDCl<sub>3</sub>)

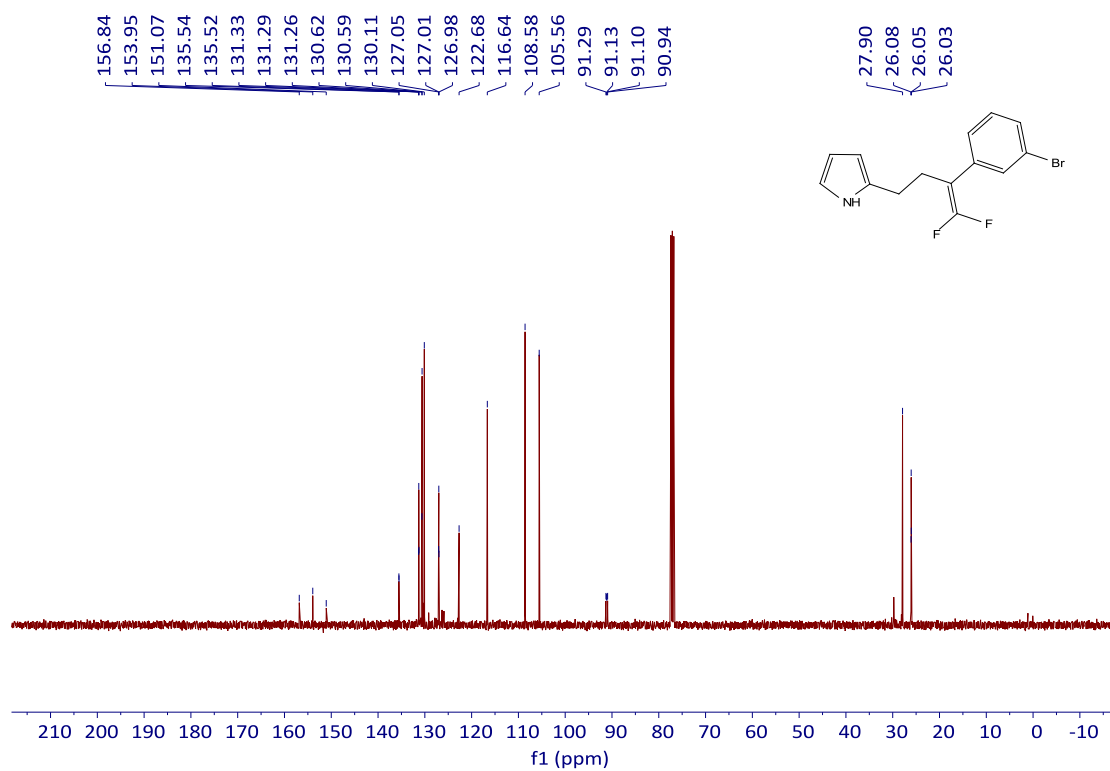

<sup>13</sup>C{<sup>1</sup>H} NMR of **3j** (100 Hz, CDCl<sub>3</sub>)

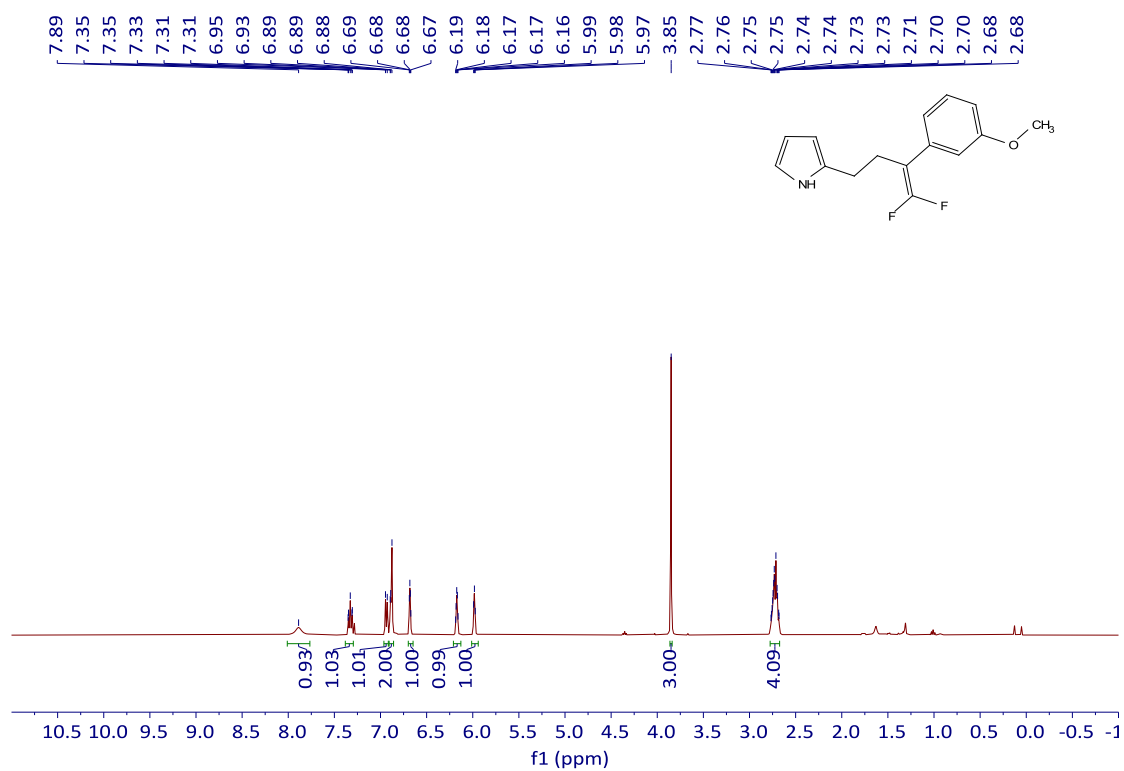

<sup>1</sup>H NMR of **3k** (400 Hz, CDCl<sub>3</sub>)

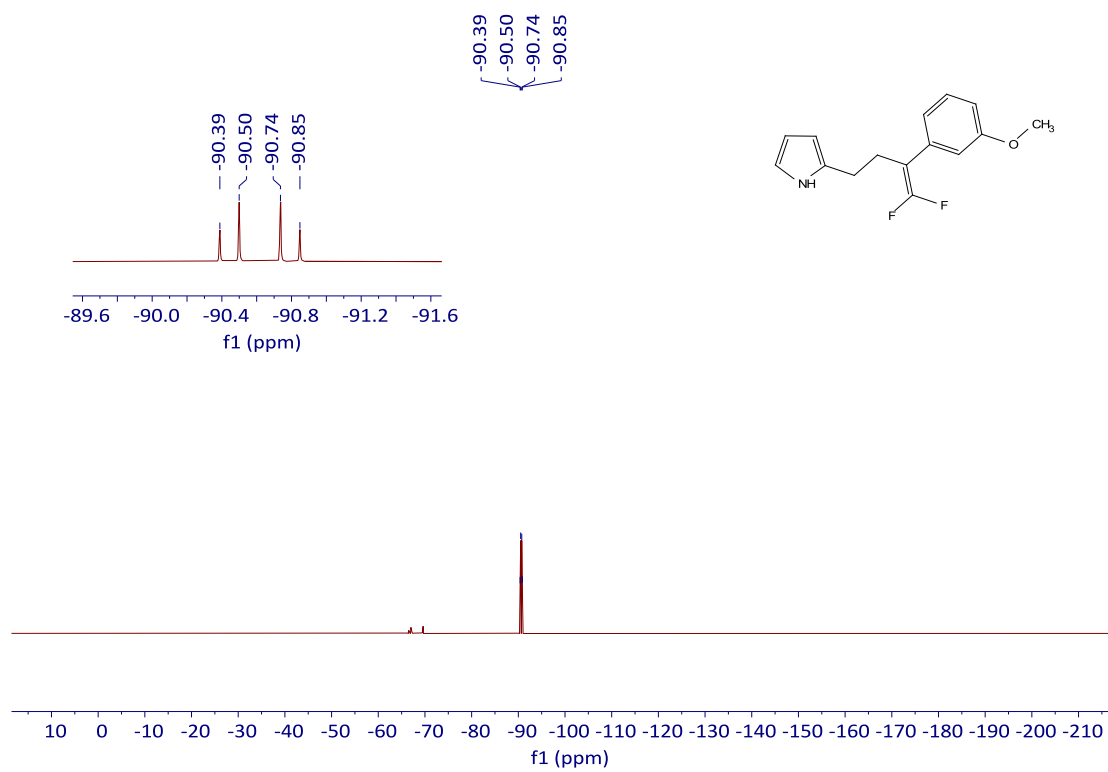

<sup>19</sup>F NMR of **3k** (376 Hz, CDCl<sub>3</sub>)

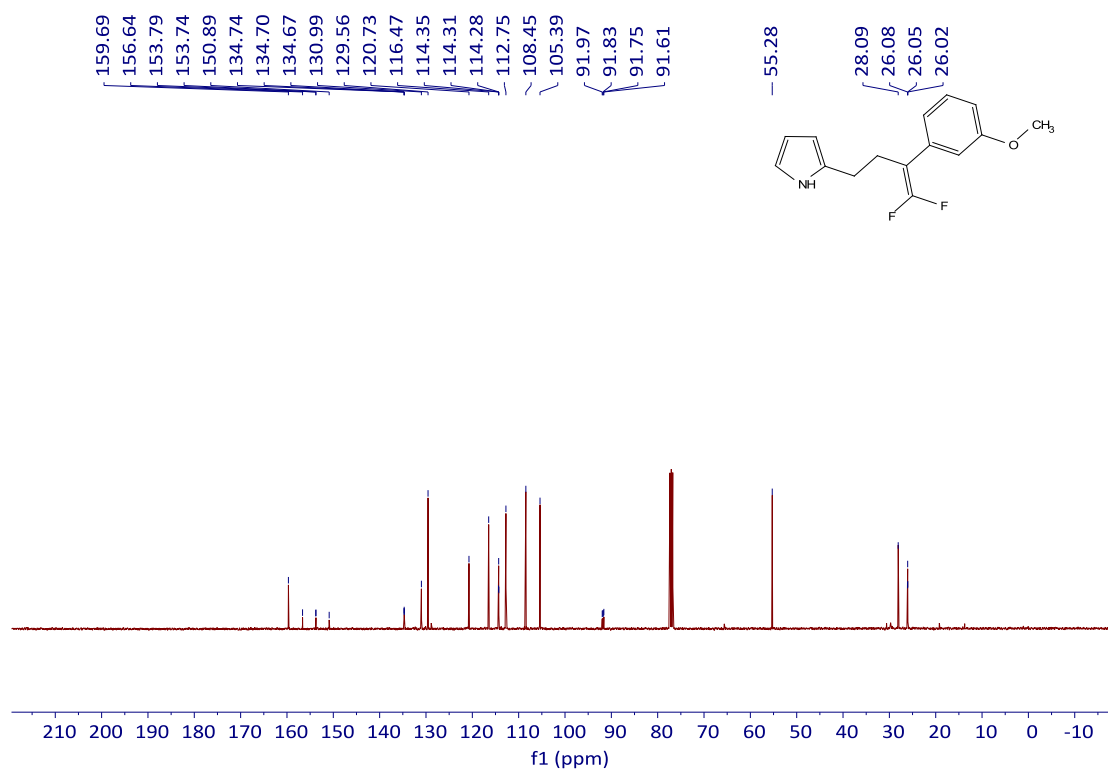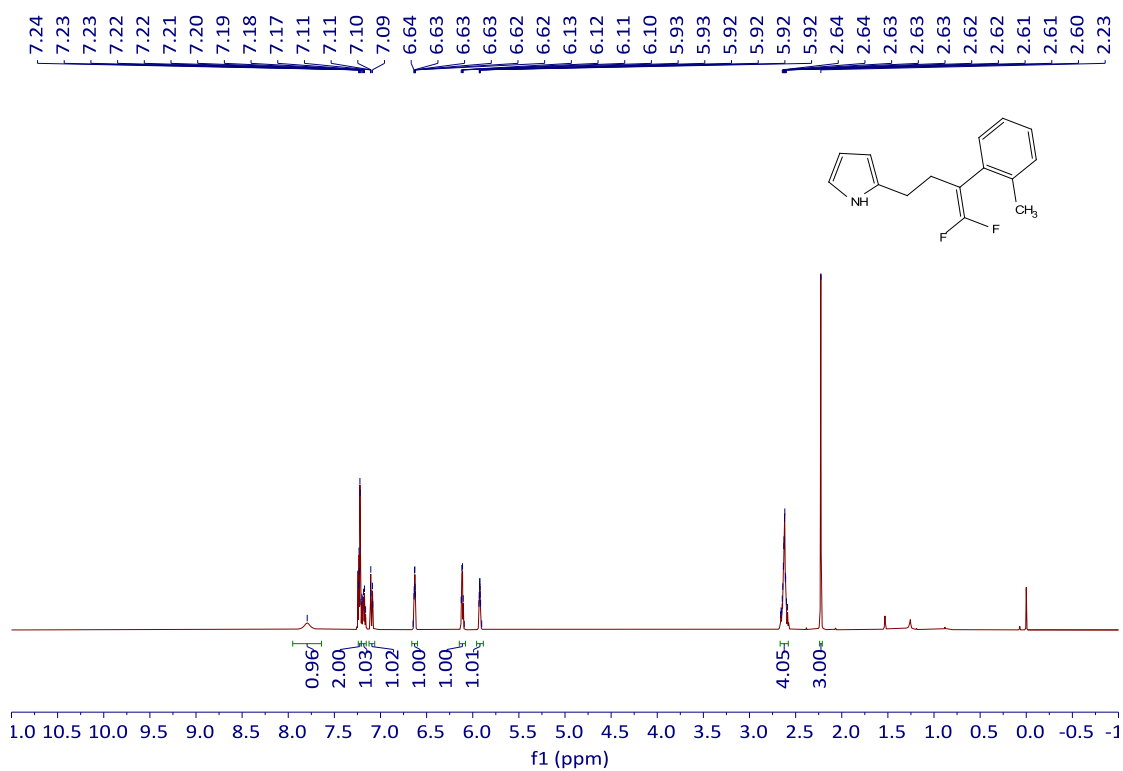

**<sup>1</sup>H NMR of **3l** (400 Hz, CDCl<sub>3</sub>)**

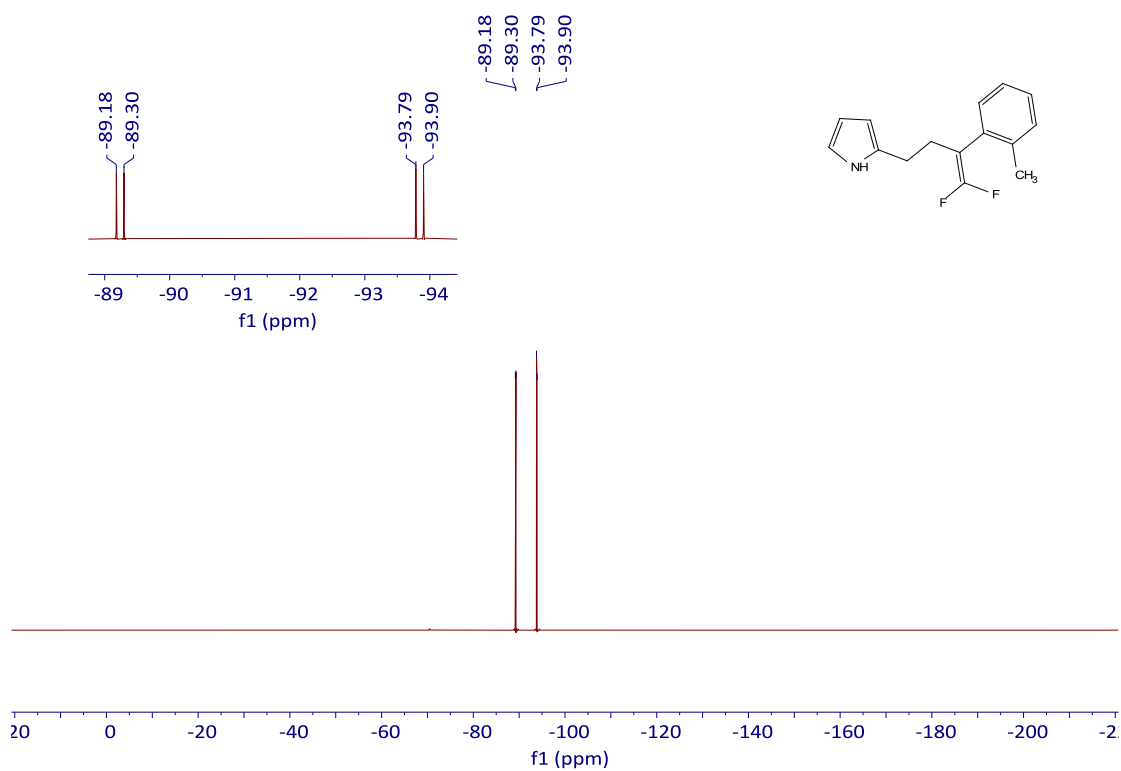

<sup>19</sup>F NMR of **3I** (376 Hz, CDCl<sub>3</sub>)

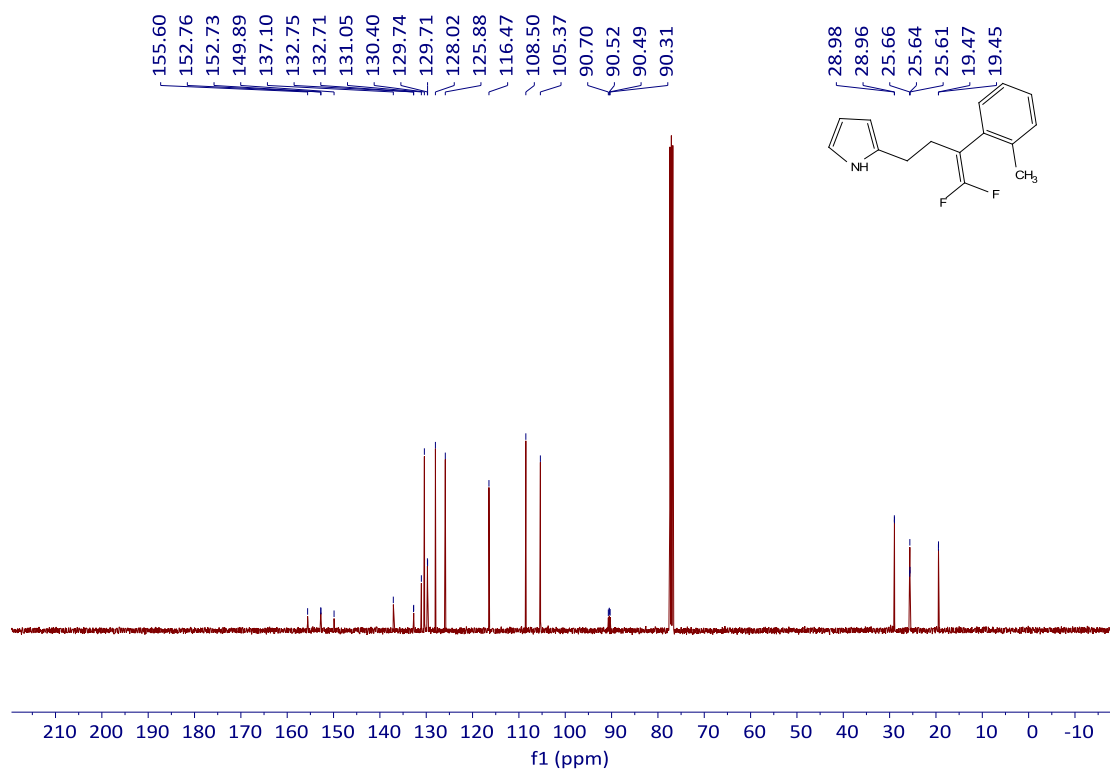

<sup>13</sup>C{<sup>1</sup>H} NMR of **3I** (100 Hz, CDCl<sub>3</sub>)

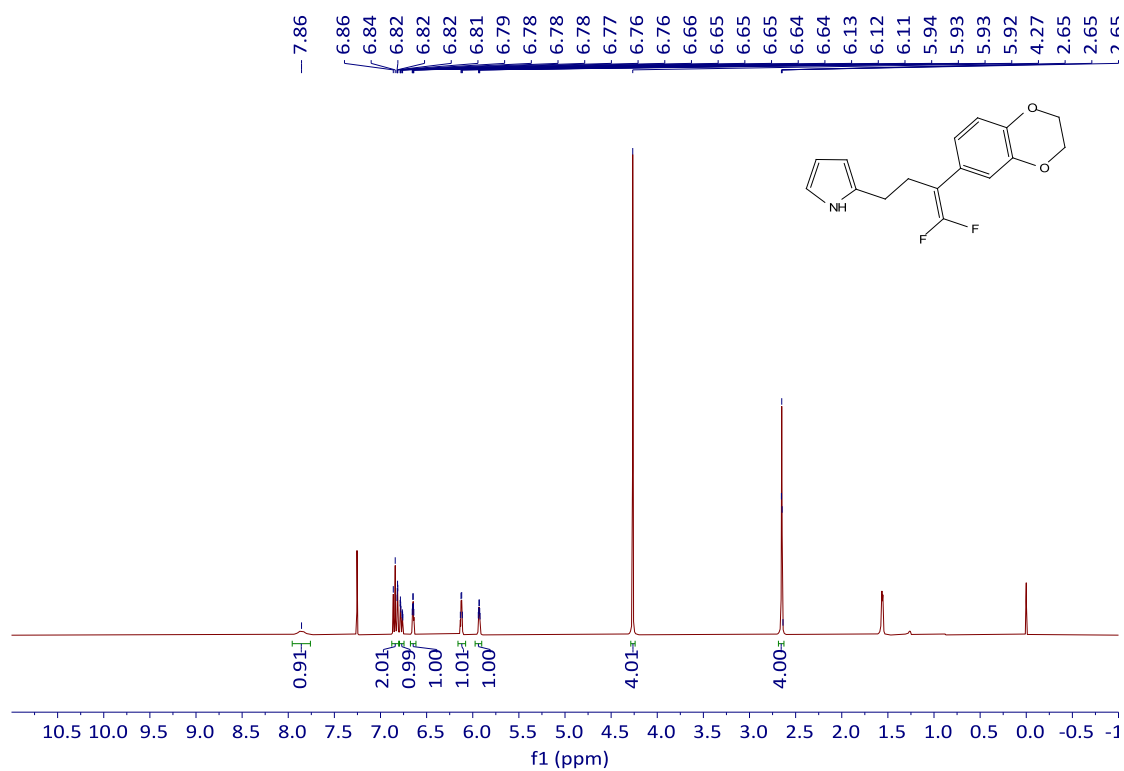

<sup>1</sup>H NMR of **3m** (400 Hz, CDCl<sub>3</sub>)

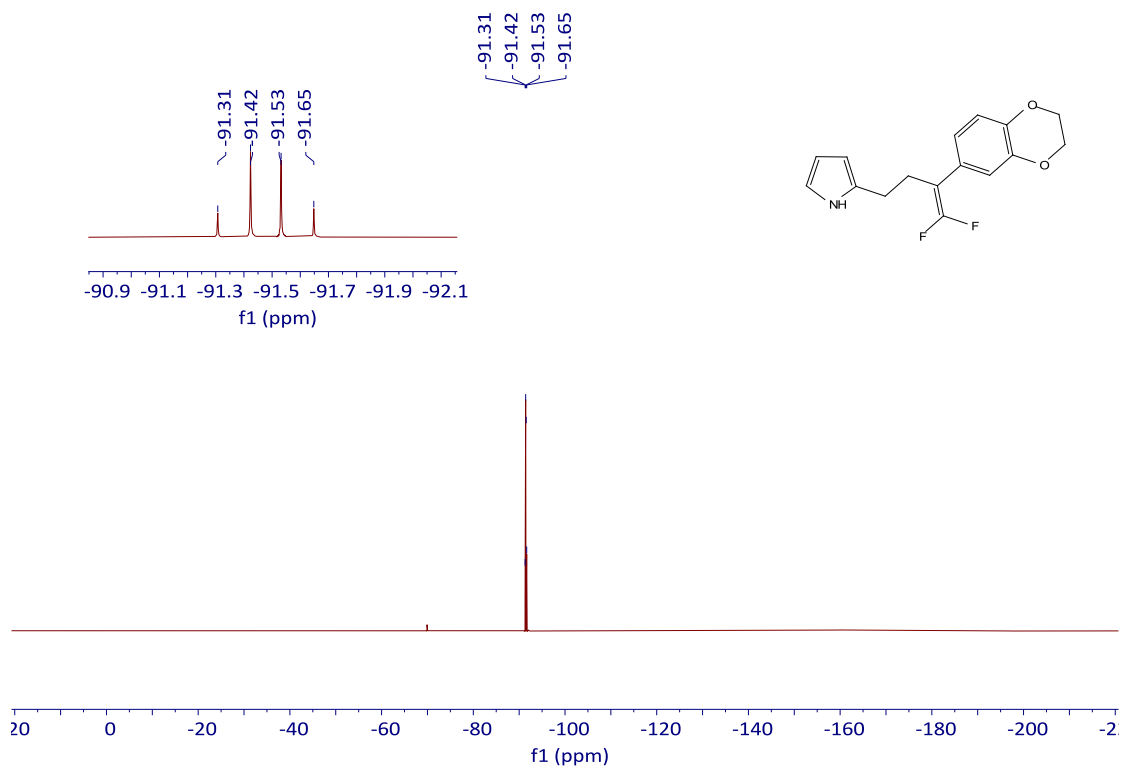

<sup>19</sup>F NMR of **3m** (376 Hz, CDCl<sub>3</sub>)



$^1\text{H}$  NMR of **3n** (400 Hz,  $\text{CDCl}_3$ )

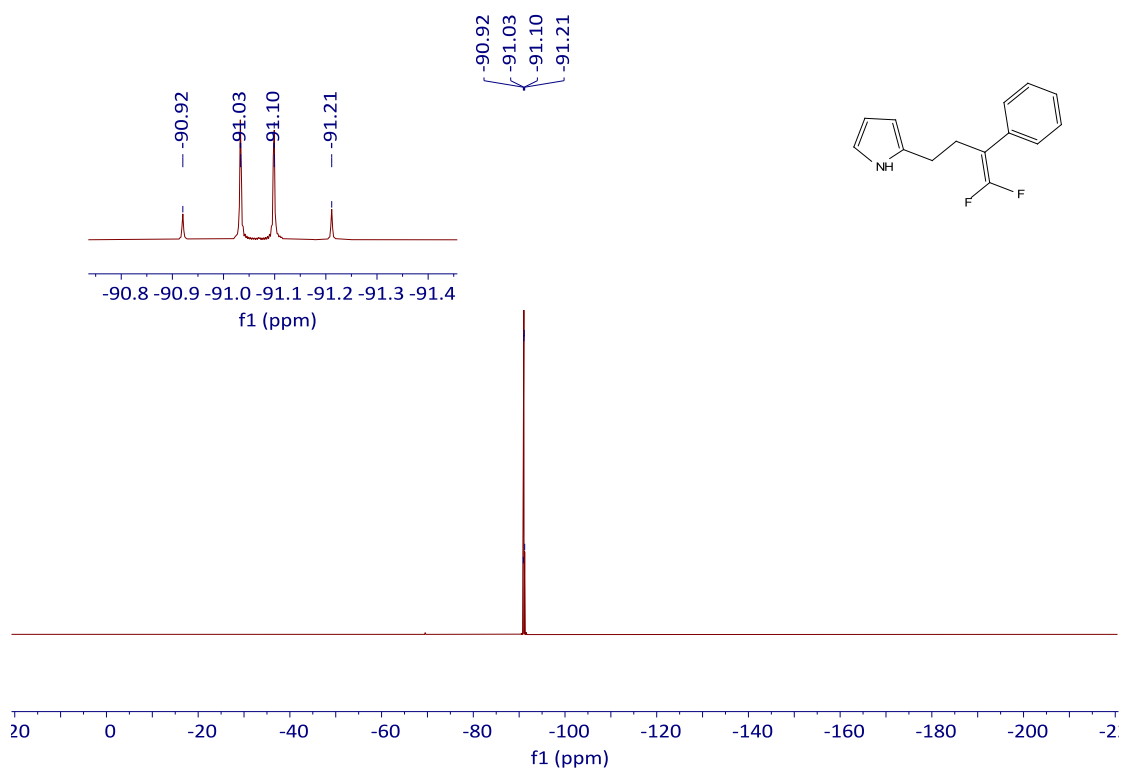

$^{19}\text{F}$  NMR of **3n** (376 Hz,  $\text{CDCl}_3$ )

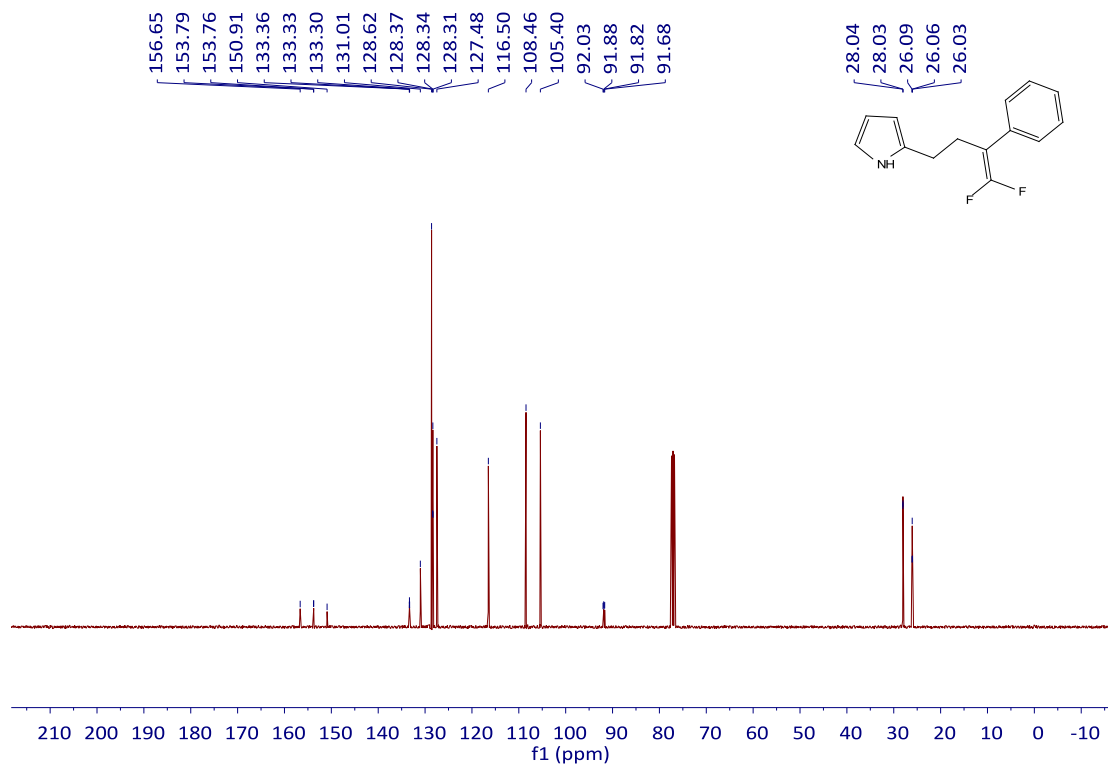

$^{13}\text{C}\{^1\text{H}\}$  NMR of **3n** (100 Hz,  $\text{CDCl}_3$ )

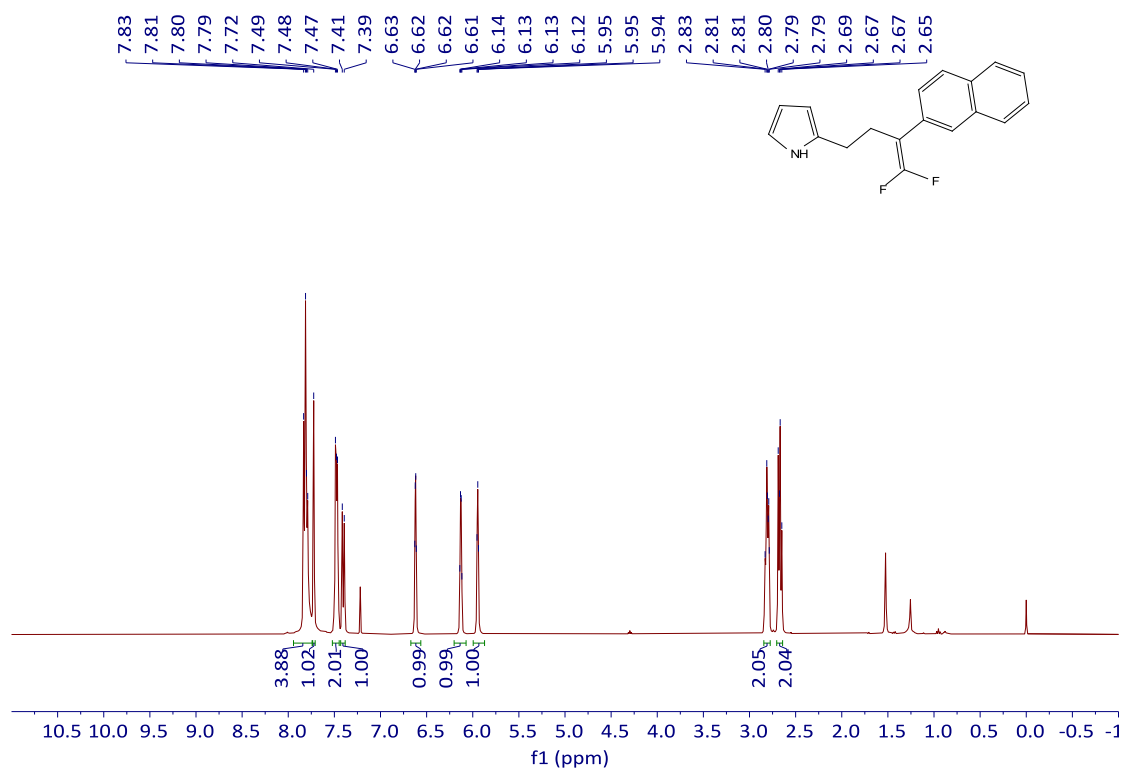

$^1\text{H}$  NMR of **3o** (400 Hz,  $\text{CDCl}_3$ )

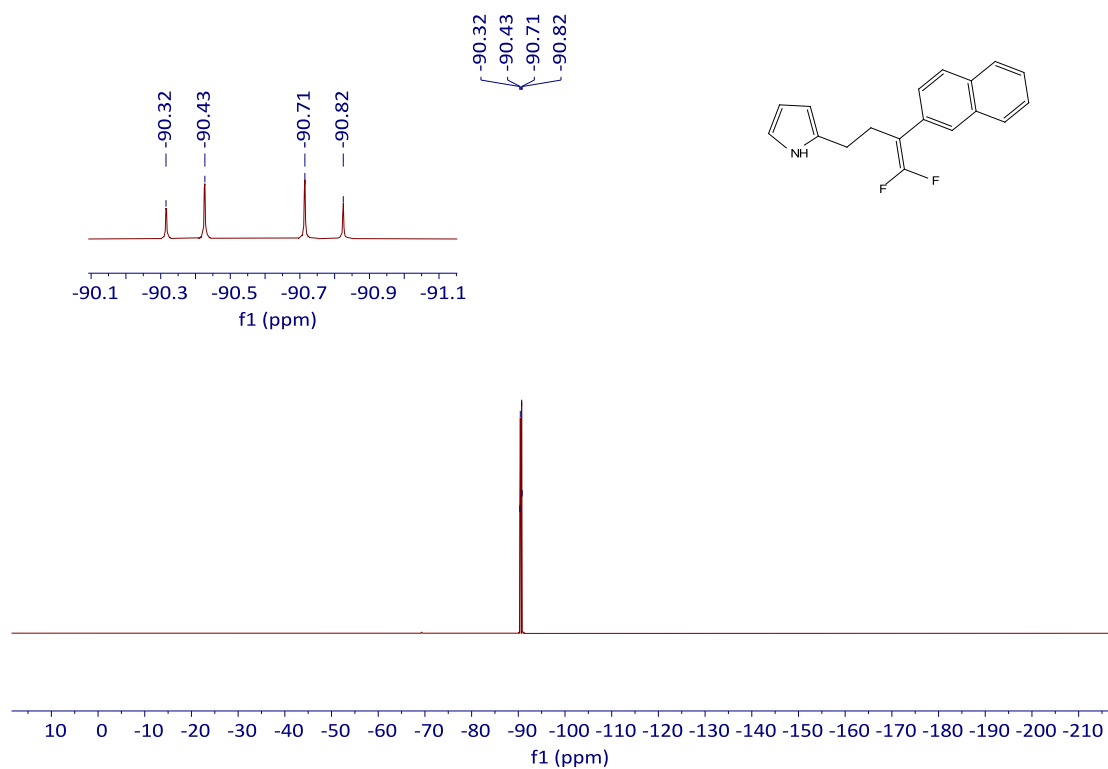

$^{19}\text{F}$  NMR of **3o** (376 Hz,  $\text{CDCl}_3$ )



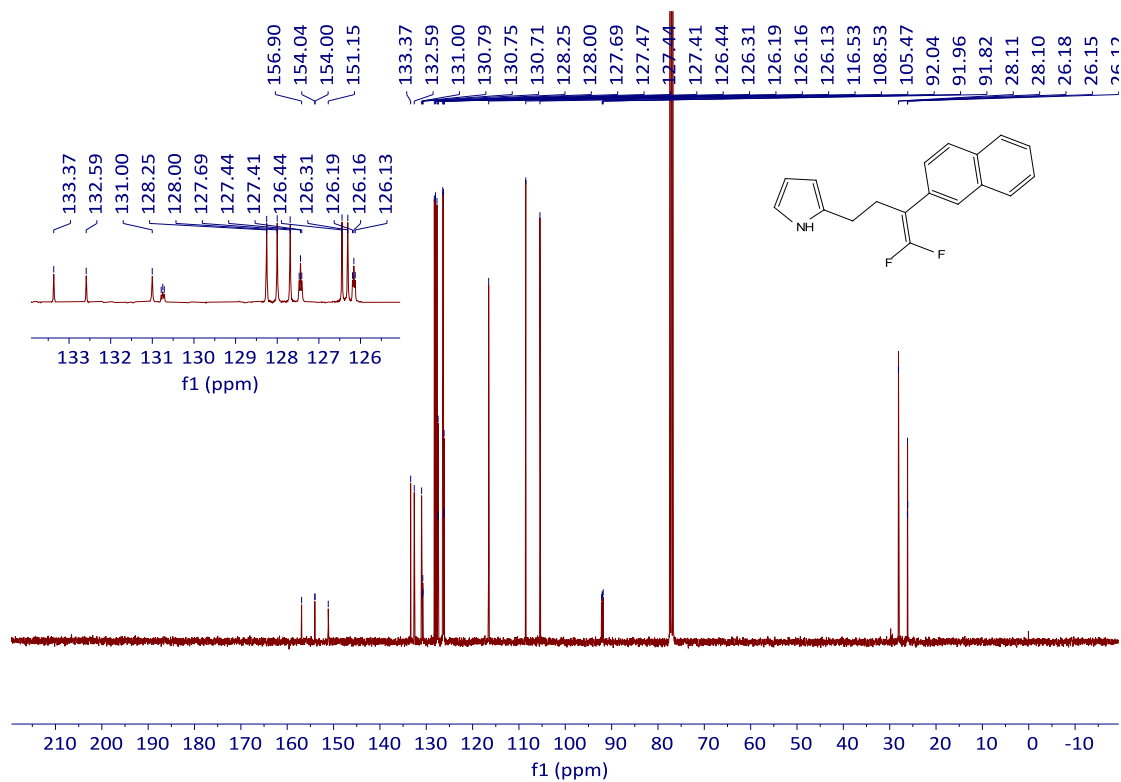

<sup>13</sup>C{<sup>1</sup>H} NMR of **3o** (100 Hz, CDCl<sub>3</sub>)

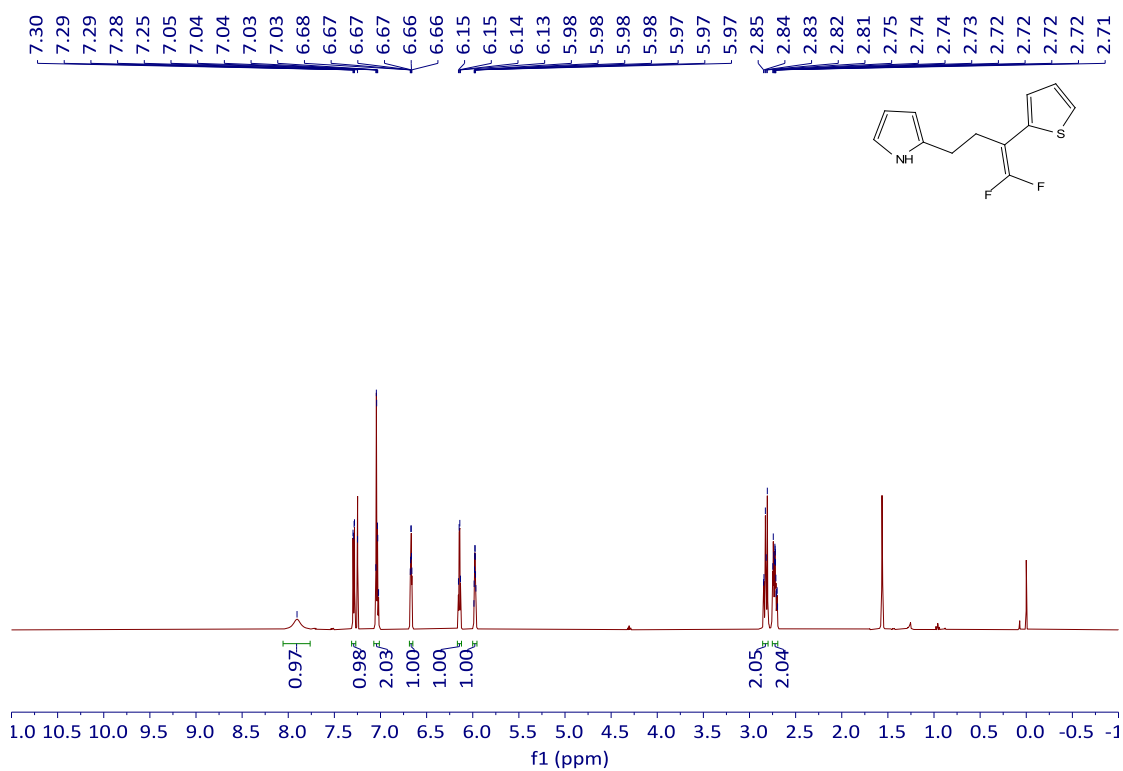

<sup>1</sup>H NMR of **3p** (400 Hz, CDCl<sub>3</sub>)

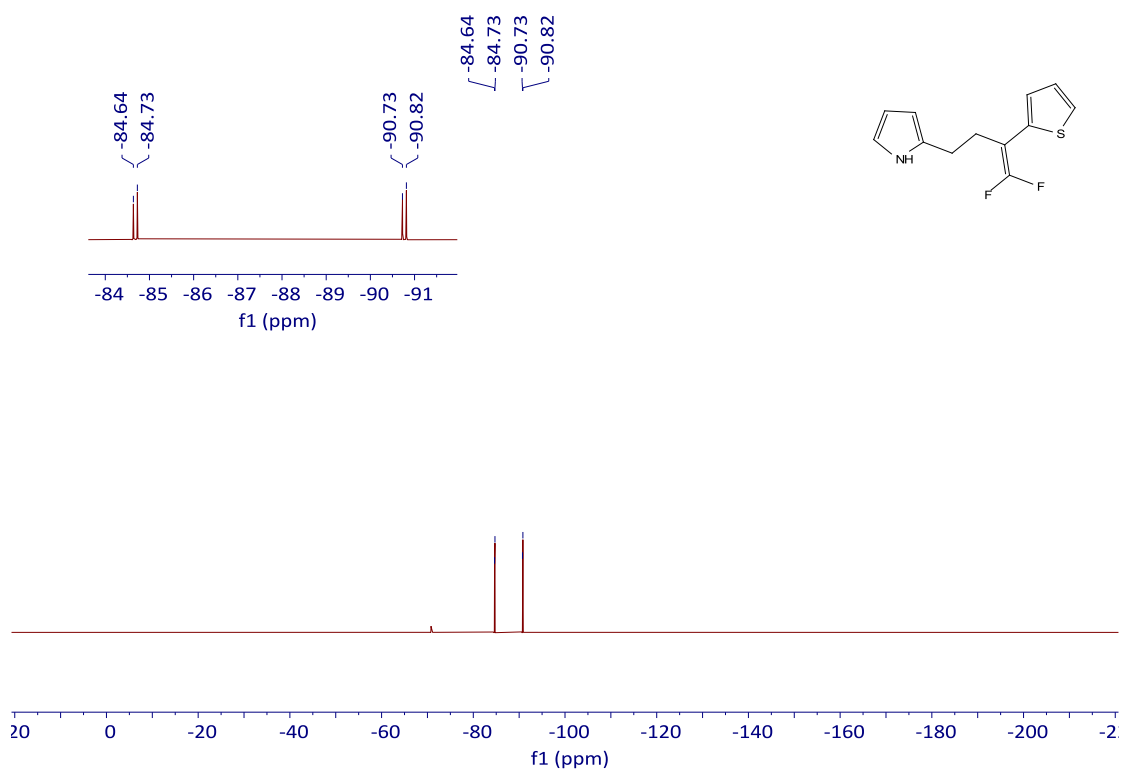

<sup>19</sup>F NMR of **3p** (376 Hz, CDCl<sub>3</sub>)

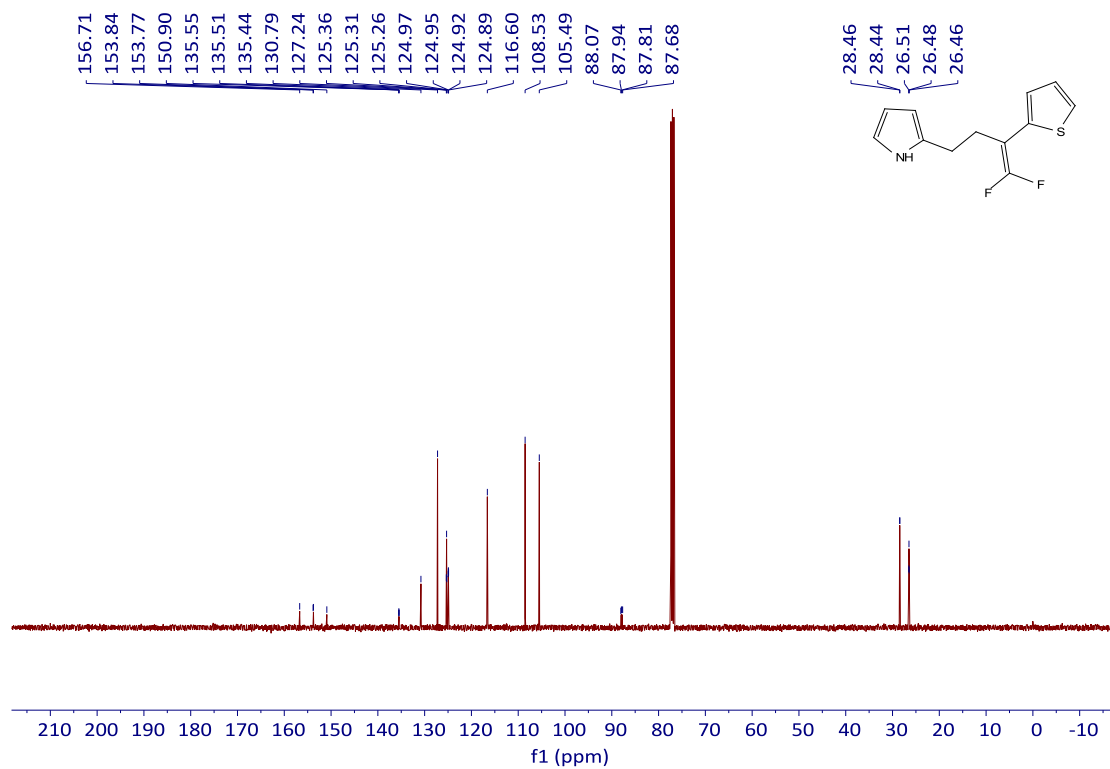

<sup>13</sup>C{<sup>1</sup>H} NMR of **3p** (100 Hz, CDCl<sub>3</sub>)

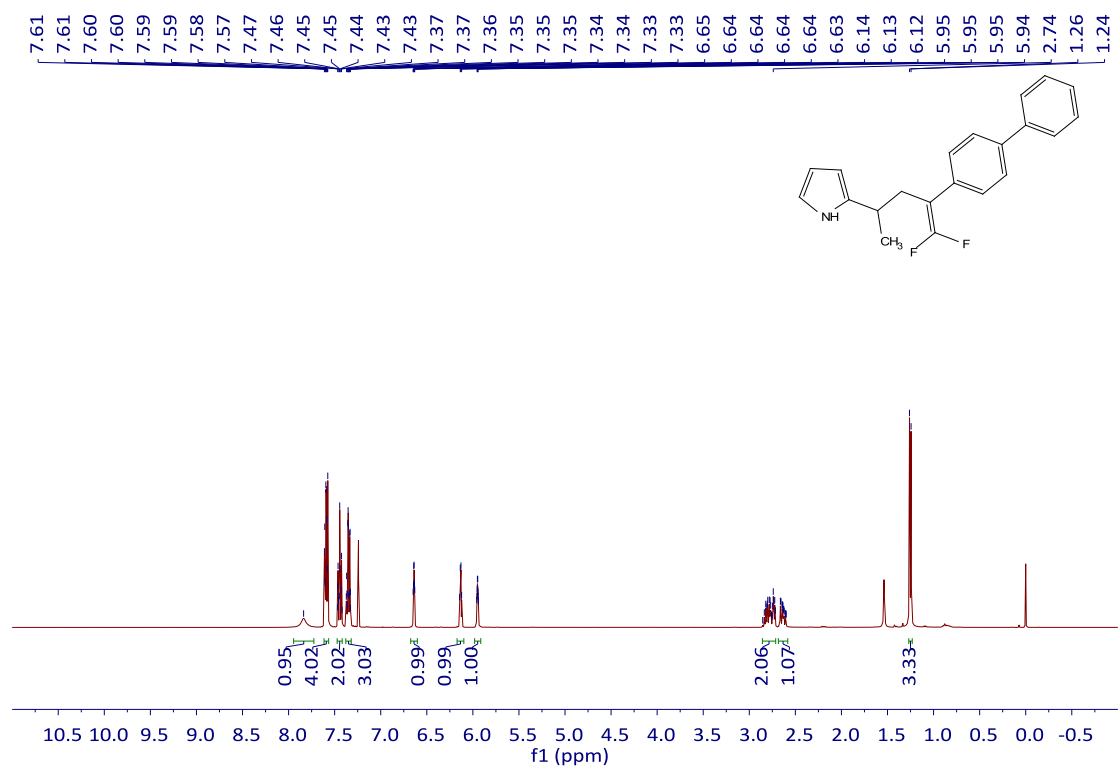

<sup>1</sup>H NMR of **3q** (400 Hz, CDCl<sub>3</sub>)

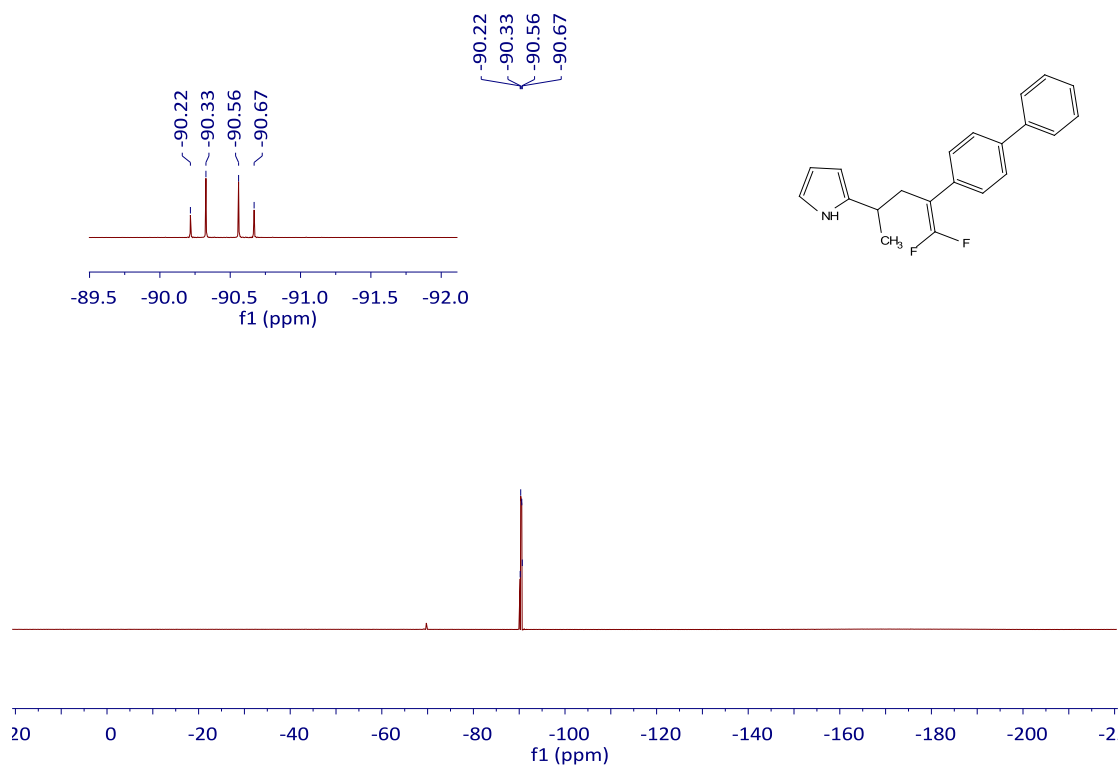

<sup>19</sup>F NMR of **3q** (376 Hz, CDCl<sub>3</sub>)

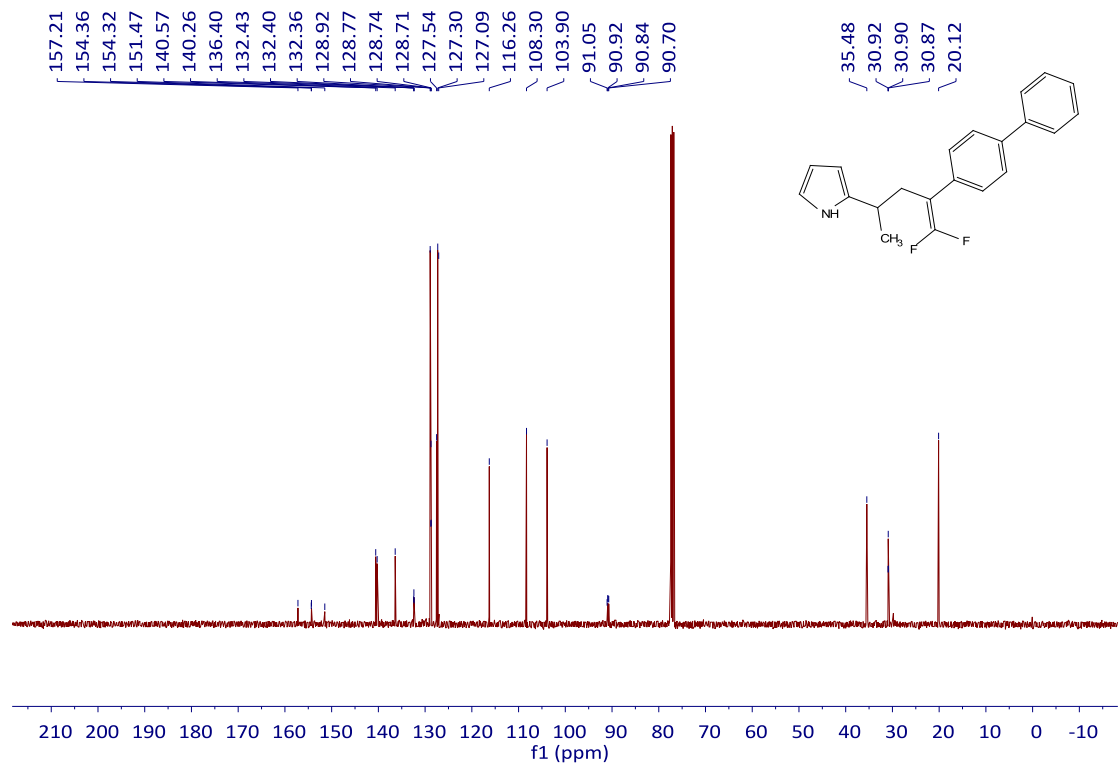

<sup>13</sup>C{<sup>1</sup>H} NMR of **3q** (100 Hz, CDCl<sub>3</sub>)

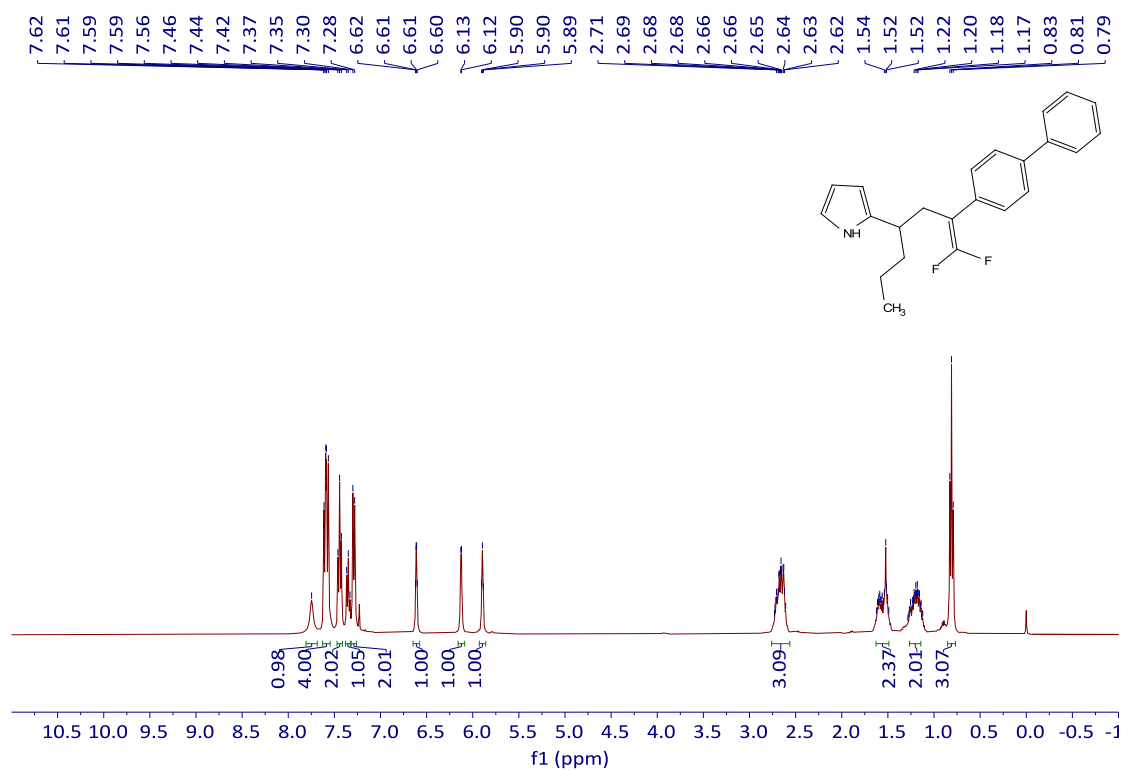

<sup>1</sup>H NMR of **3r** (400 Hz, CDCl<sub>3</sub>)

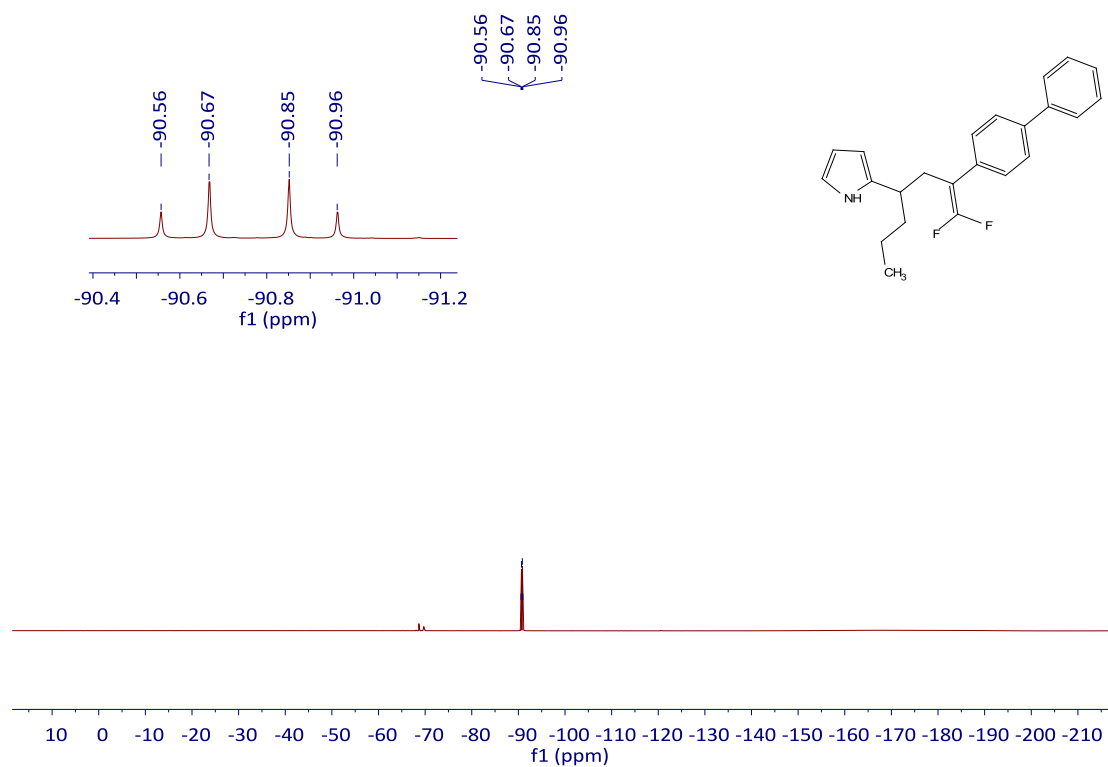

<sup>19</sup>F NMR of **3r** (376 Hz, CDCl<sub>3</sub>)

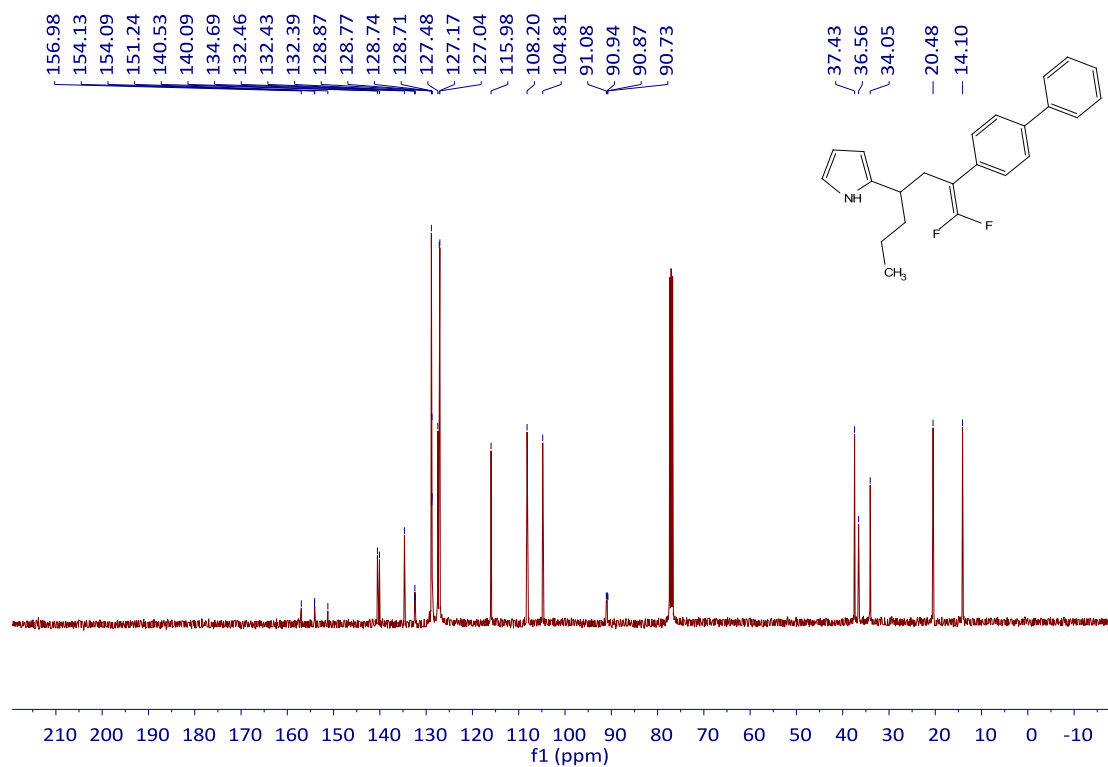

<sup>13</sup>C{<sup>1</sup>H} NMR of **3r** (100 Hz, CDCl<sub>3</sub>)

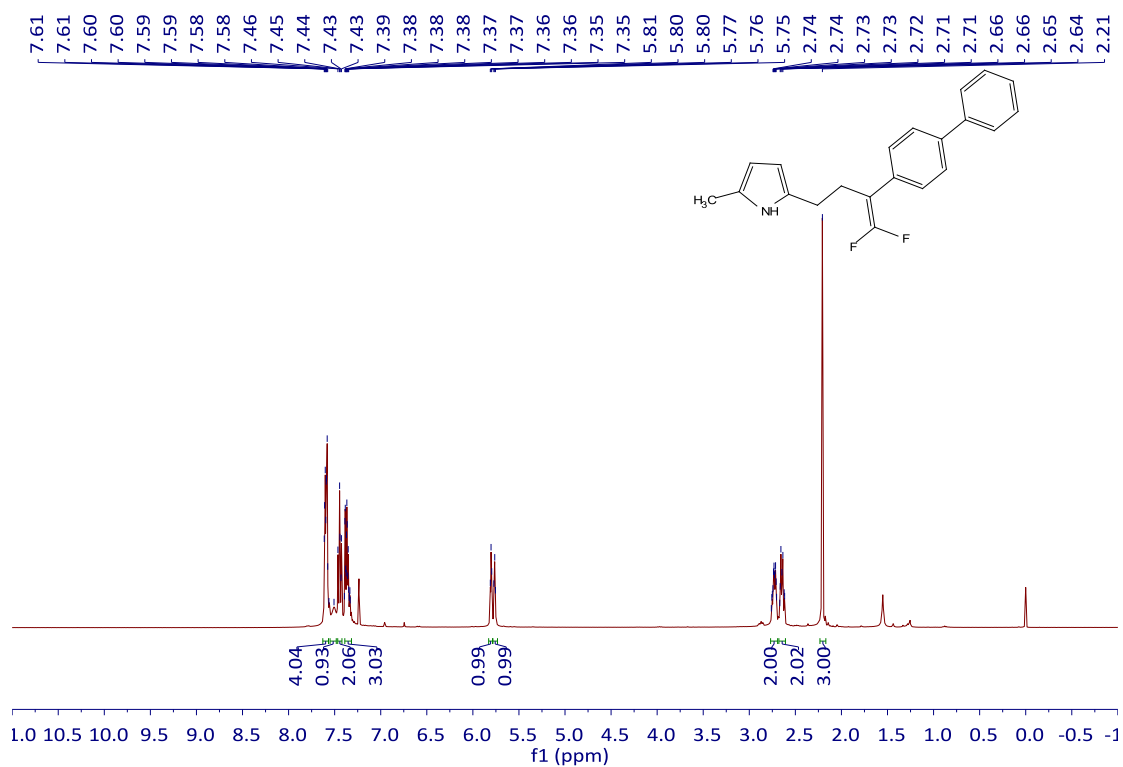

<sup>1</sup>H NMR of **3s** (400 Hz, CDCl<sub>3</sub>)

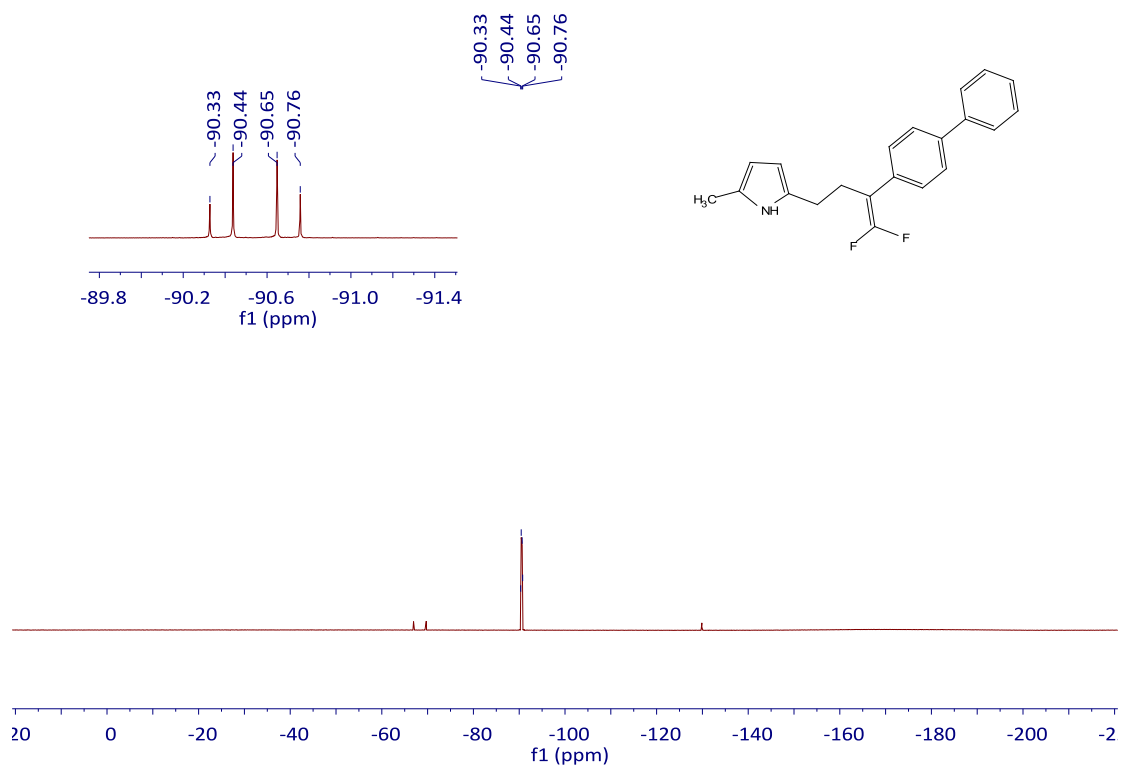

<sup>19</sup>F NMR of **3s** (376 Hz, CDCl<sub>3</sub>)

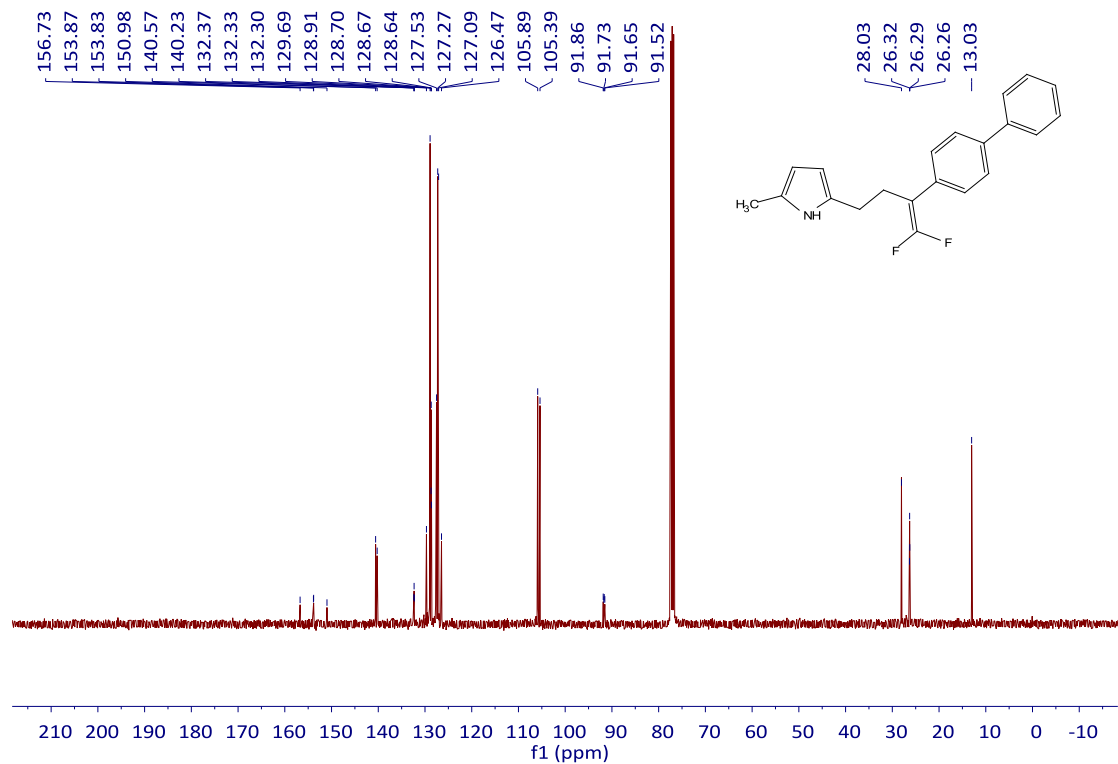

<sup>13</sup>C{<sup>1</sup>H} NMR of **3s** (100 Hz, CDCl<sub>3</sub>)

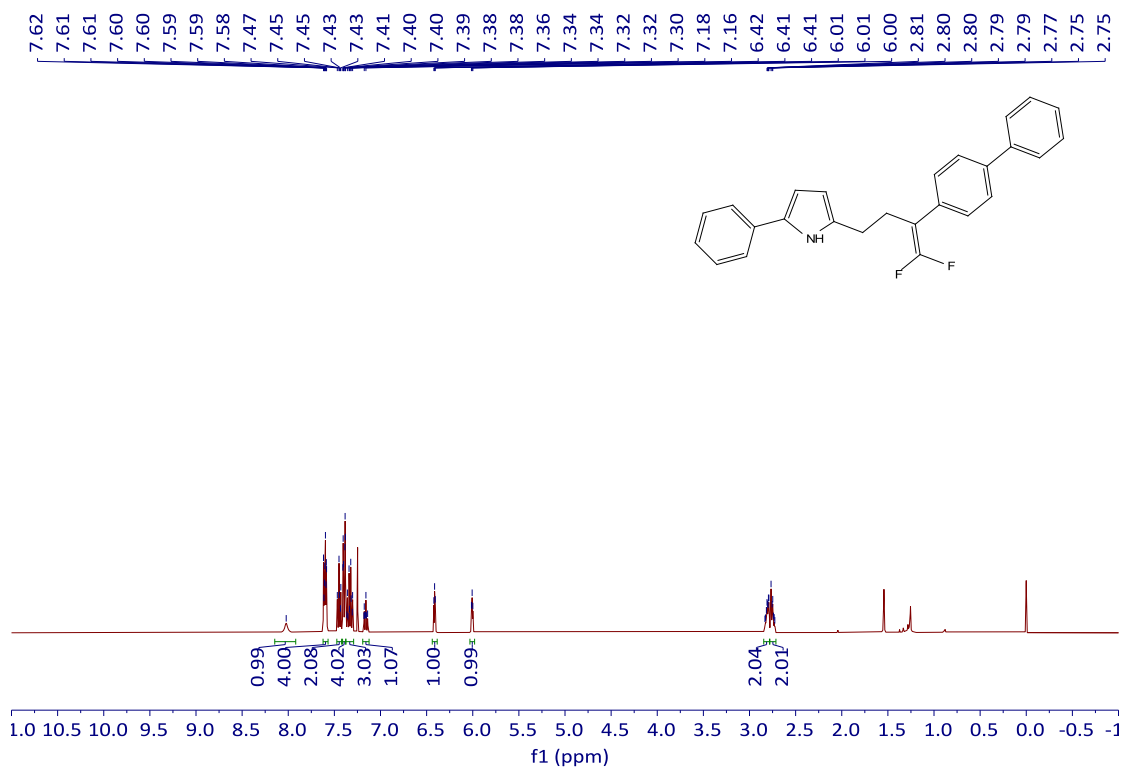

<sup>1</sup>H NMR of **3t** (400 Hz, CDCl<sub>3</sub>)

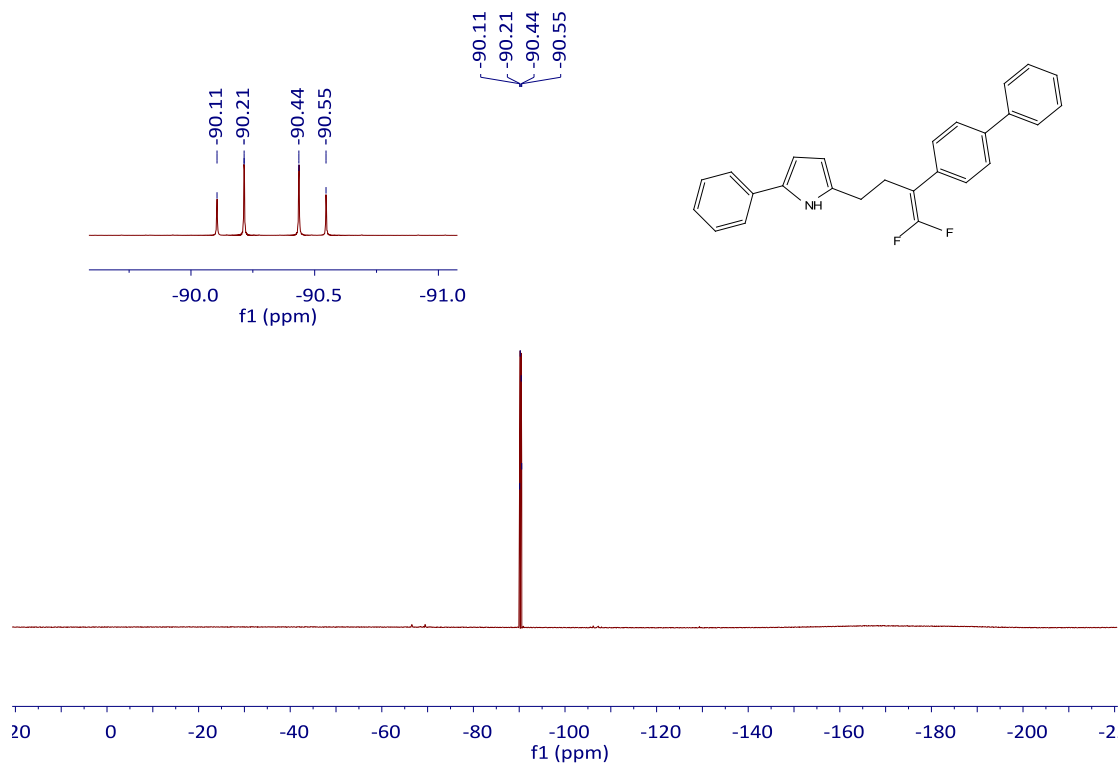

<sup>19</sup>F NMR of **3t** (376 Hz, CDCl<sub>3</sub>)

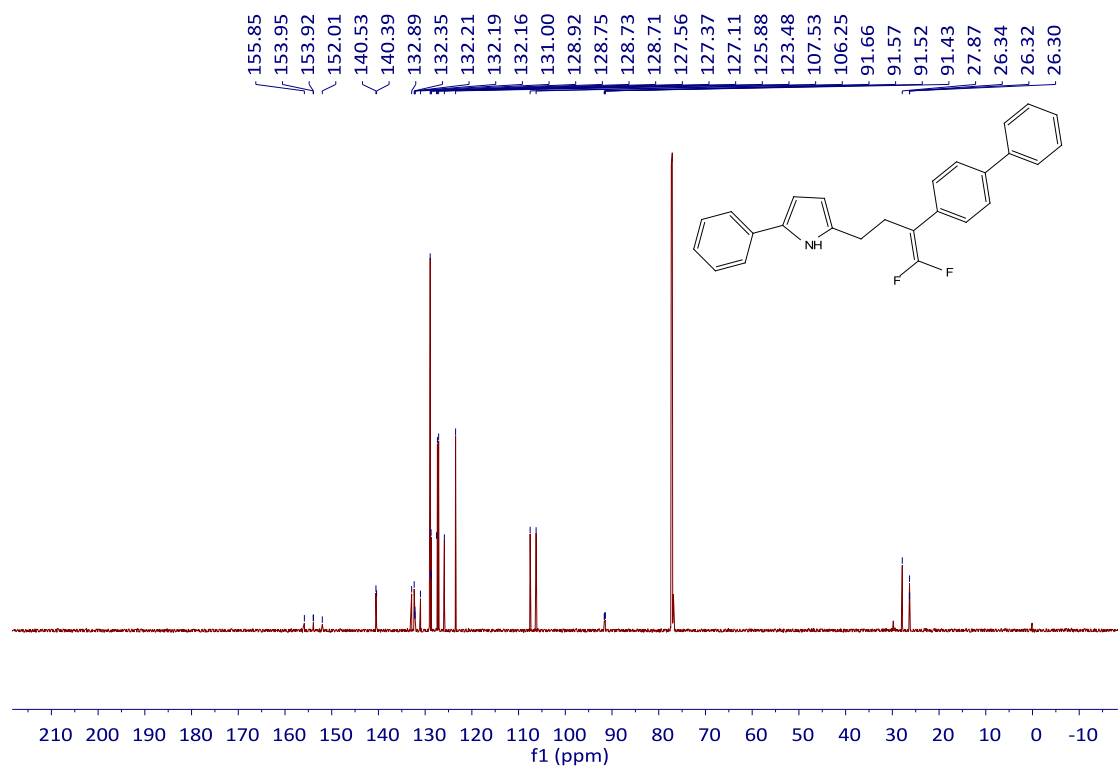

<sup>13</sup>C{<sup>1</sup>H} NMR of **3t** (150 Hz, CDCl<sub>3</sub>)



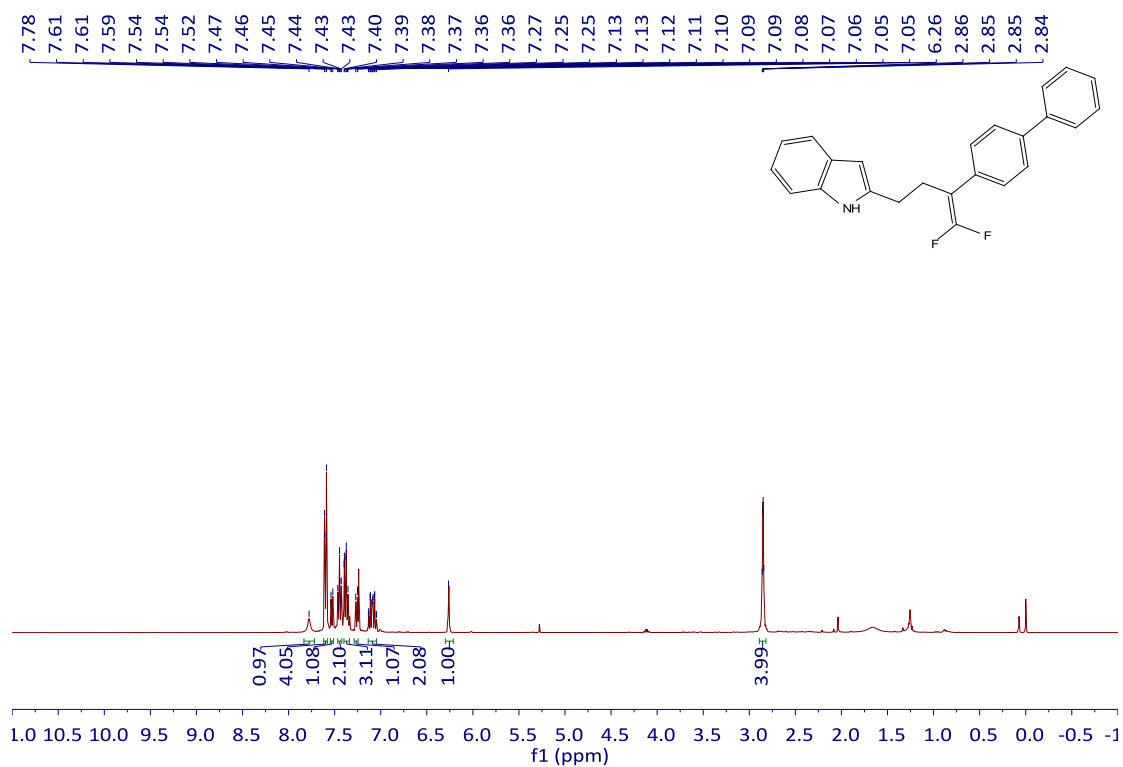

<sup>1</sup>H NMR of **3u** (400 Hz, CDCl<sub>3</sub>)

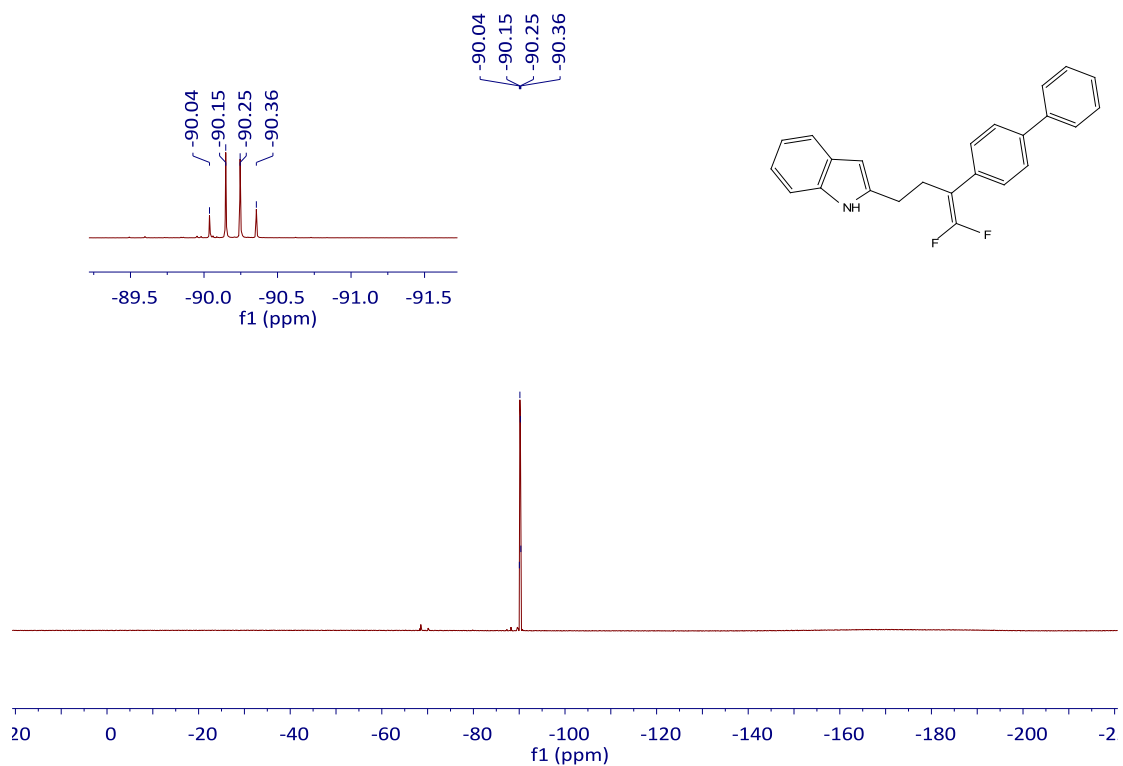

<sup>19</sup>F NMR of **3u** (376 Hz, CDCl<sub>3</sub>)

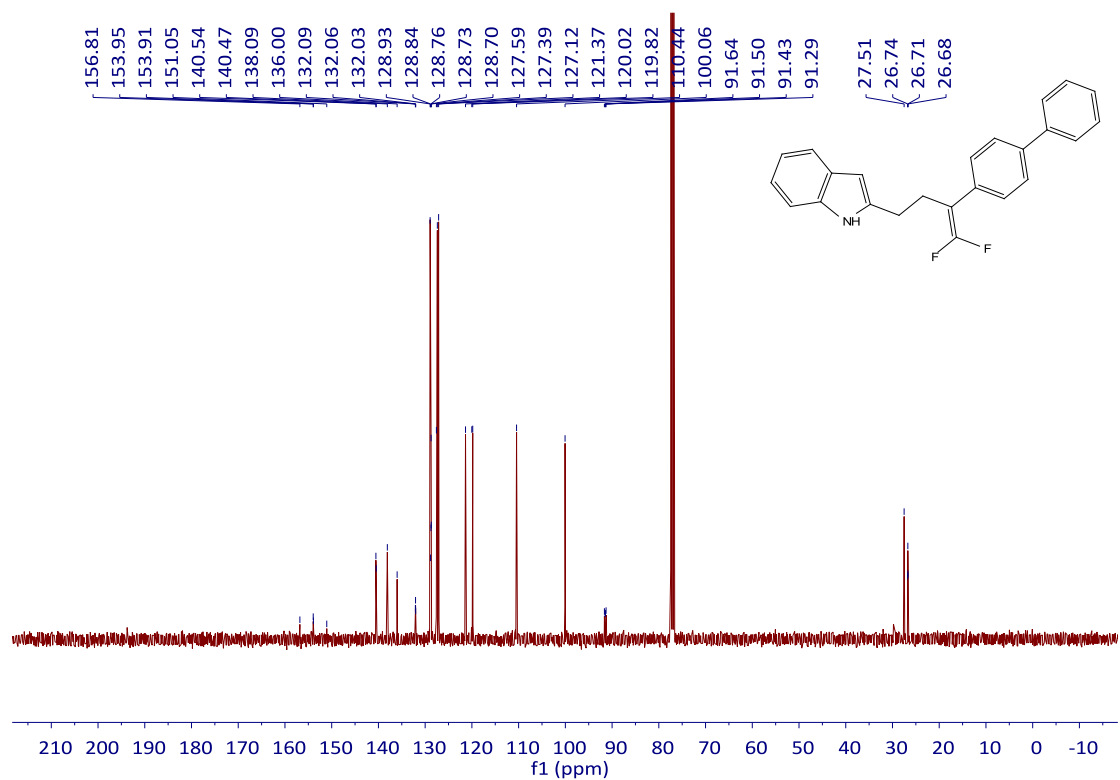

$^{13}\text{C}\{^1\text{H}\}$  NMR of **3u** (100 Hz,  $\text{CDCl}_3$ )

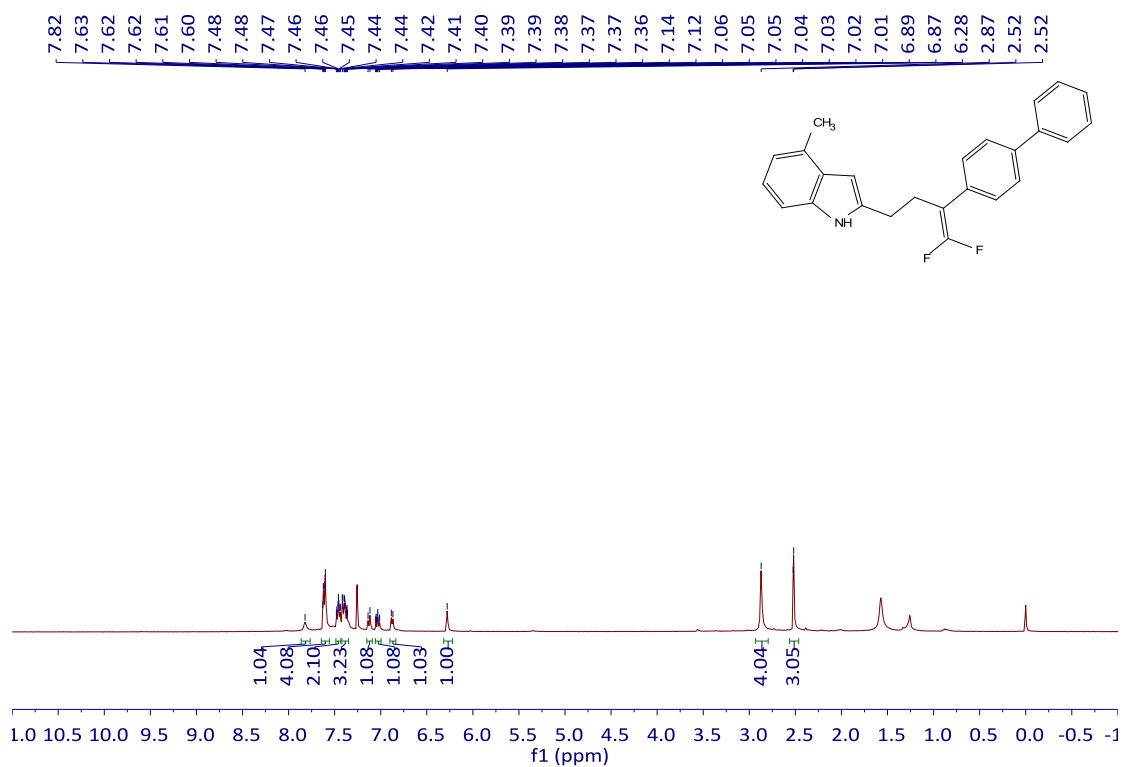

$^1\text{H}$  NMR of **3v** (400 Hz,  $\text{CDCl}_3$ )

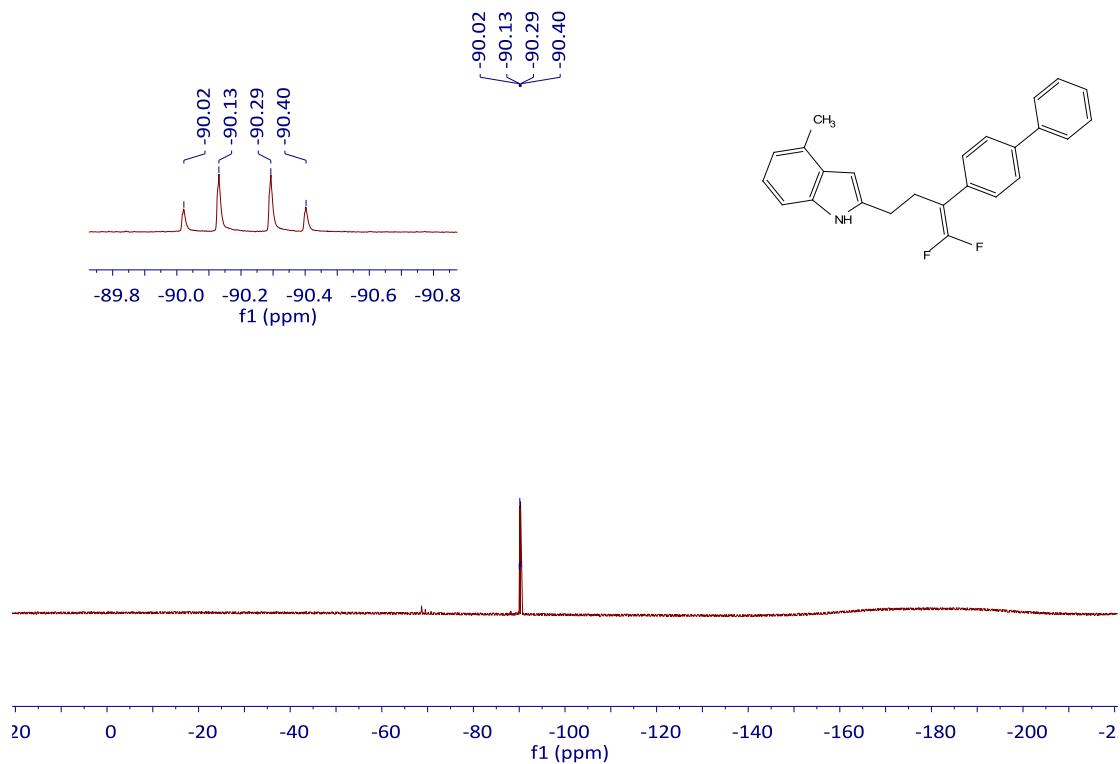

<sup>19</sup>F NMR of **3v** (376 Hz, CDCl<sub>3</sub>)

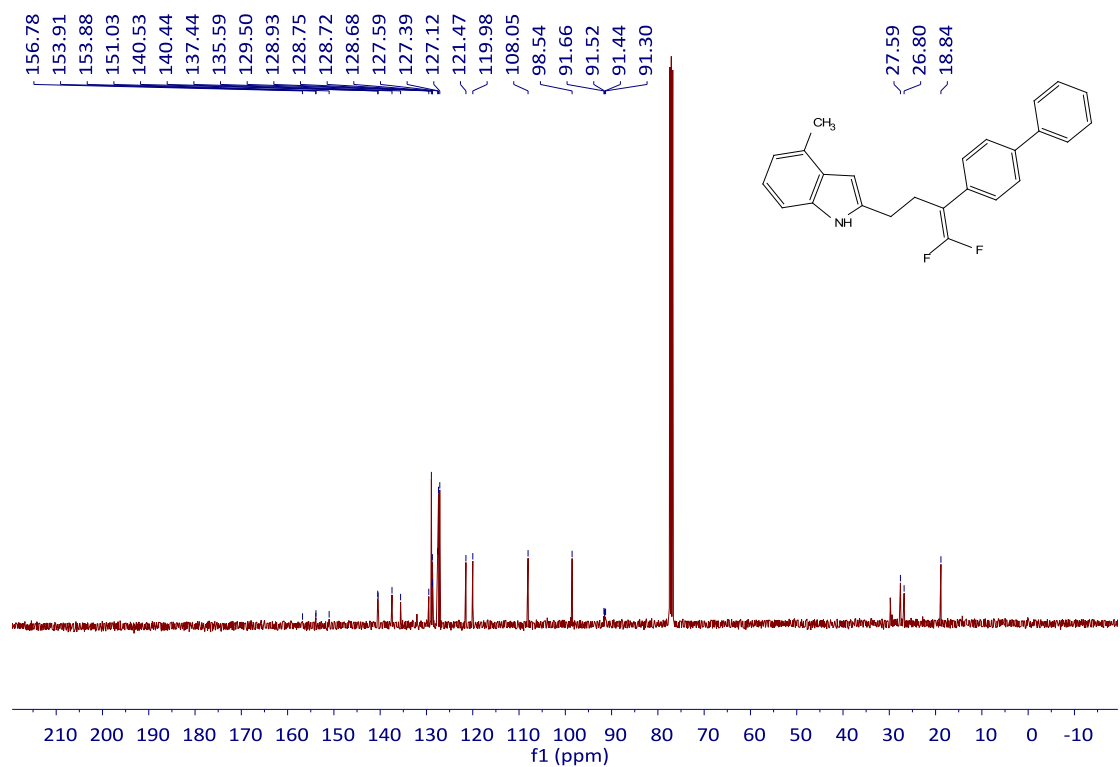

<sup>13</sup>C{<sup>1</sup>H} NMR of **3v** (100 Hz, CDCl<sub>3</sub>)

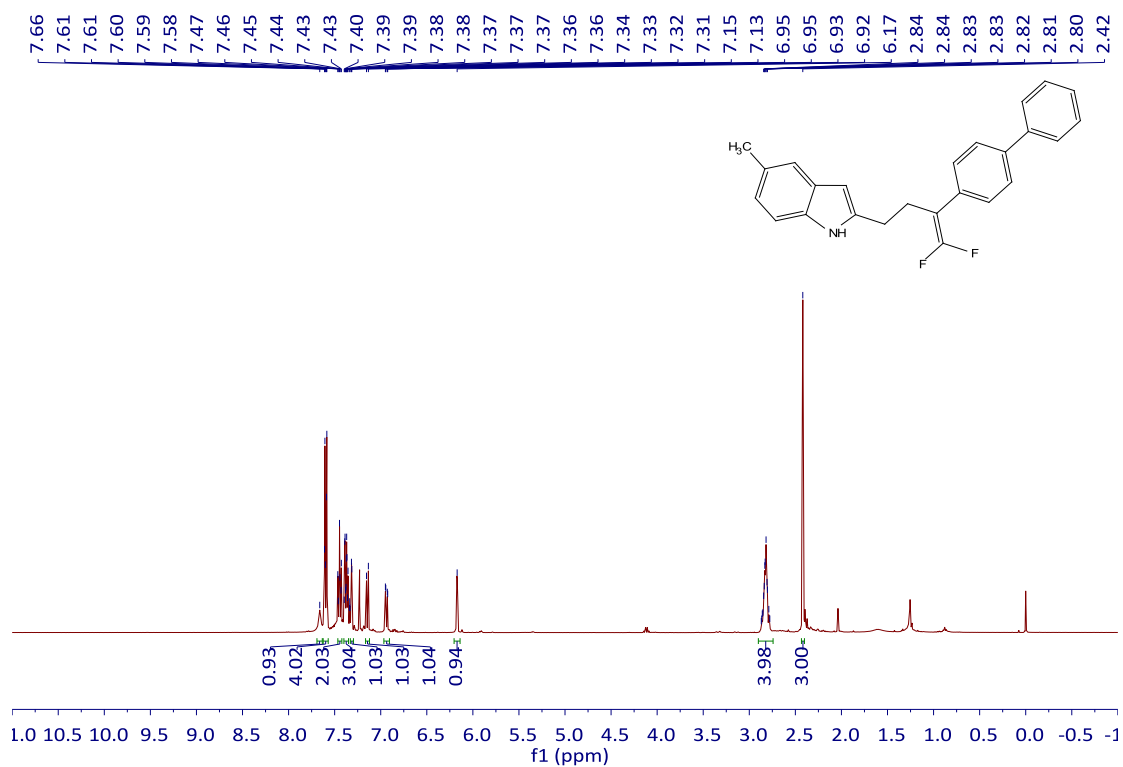

<sup>1</sup>H NMR of **3w** (400 Hz, CDCl<sub>3</sub>)

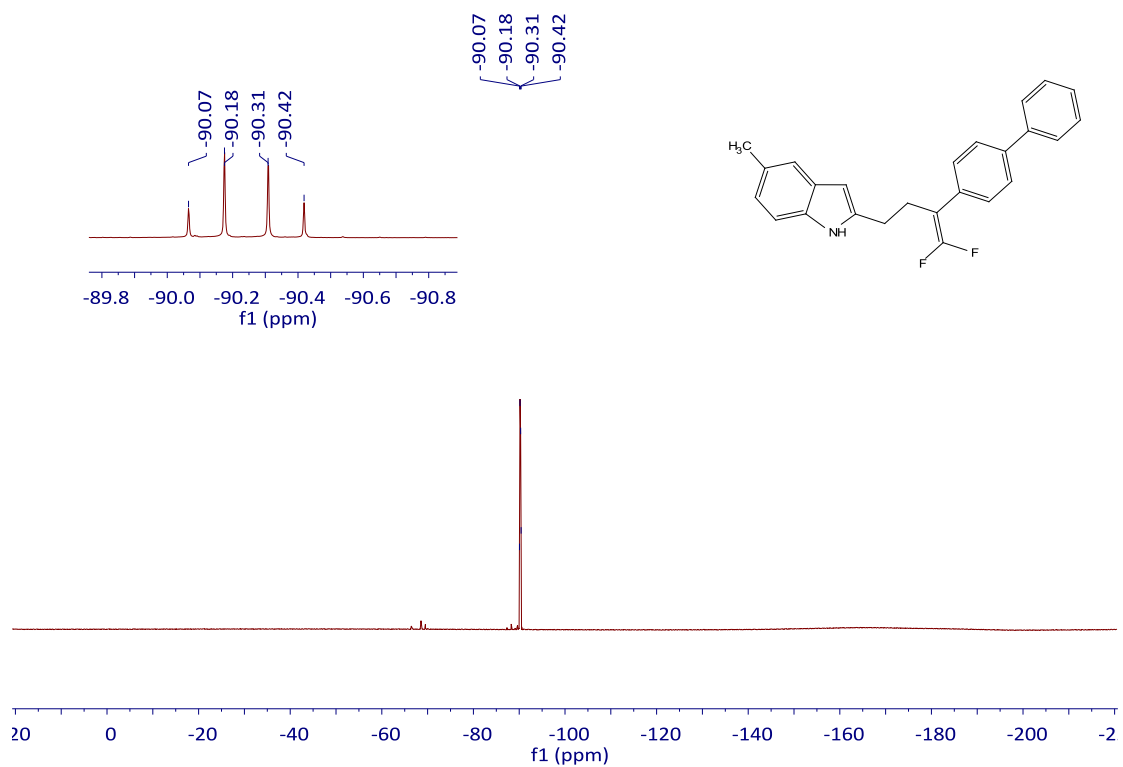

<sup>19</sup>F NMR of **3w** (376 Hz, CDCl<sub>3</sub>)

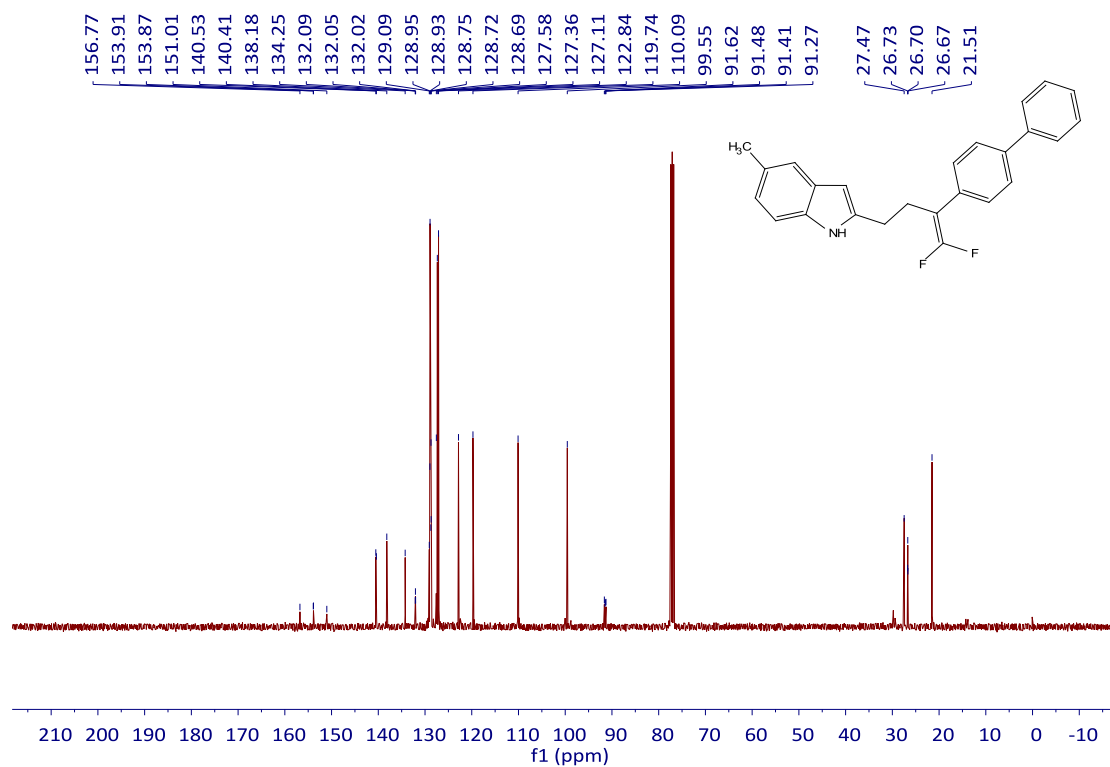

$^{13}\text{C}\{^1\text{H}\}$  NMR of **3w** (100 Hz,  $\text{CDCl}_3$ )

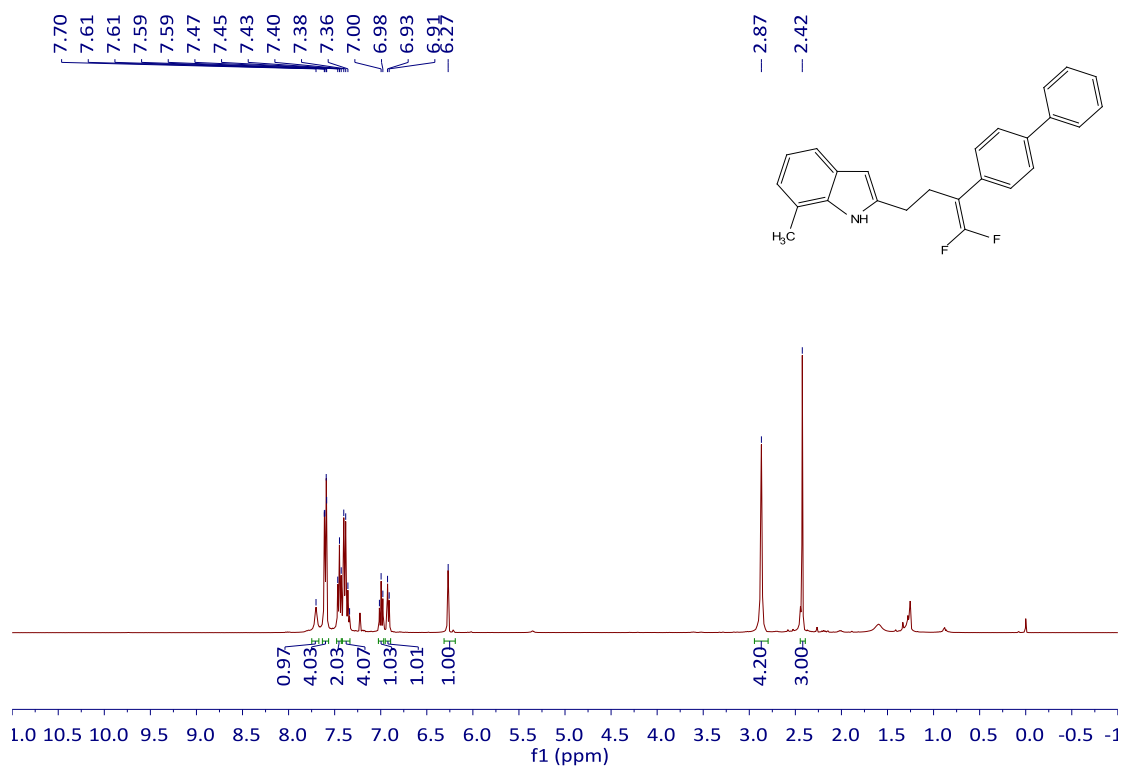

$^1\text{H}$  NMR of **3x** (400 Hz,  $\text{CDCl}_3$ )

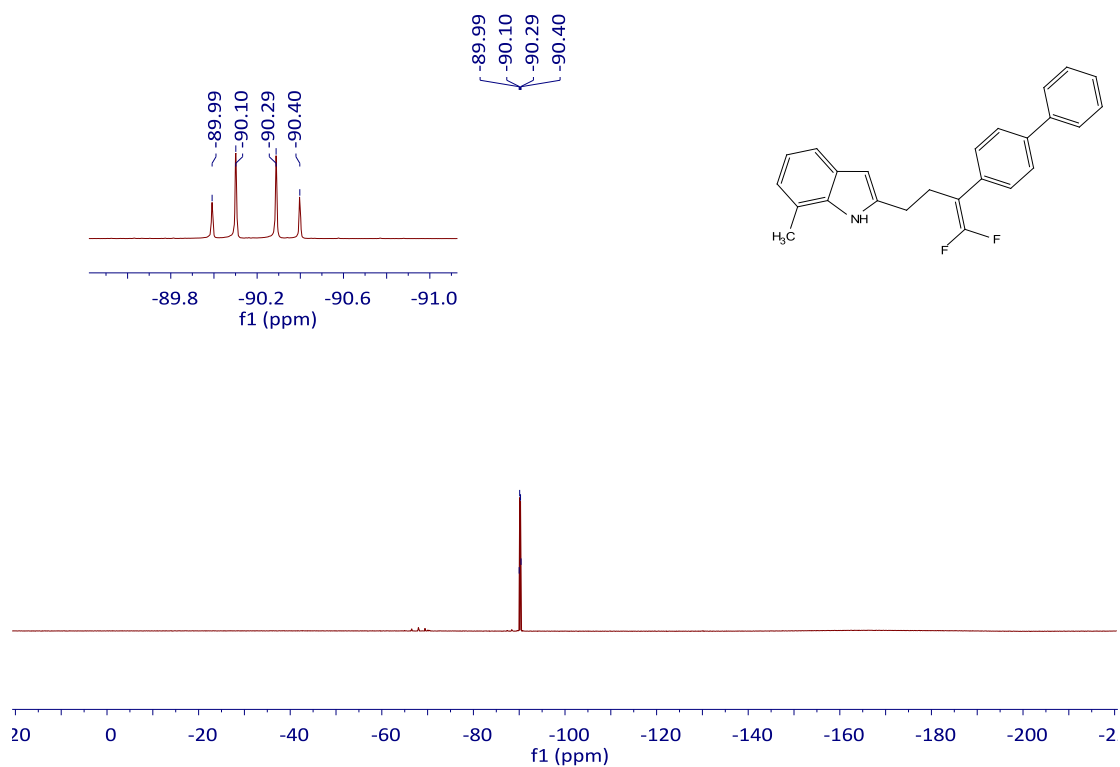

$^{19}\text{F}$  NMR of **3x** (376 Hz,  $\text{CDCl}_3$ )

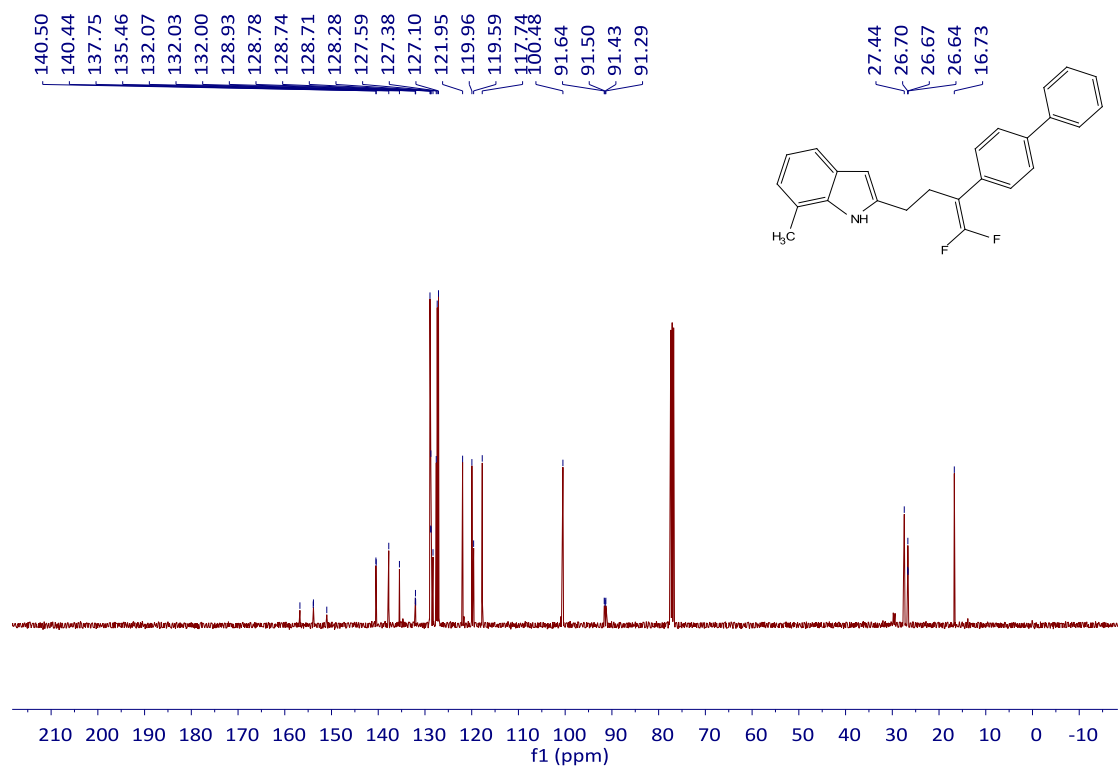

$^{13}\text{C}\{^1\text{H}\}$  NMR of **3x** (100 Hz,  $\text{CDCl}_3$ )

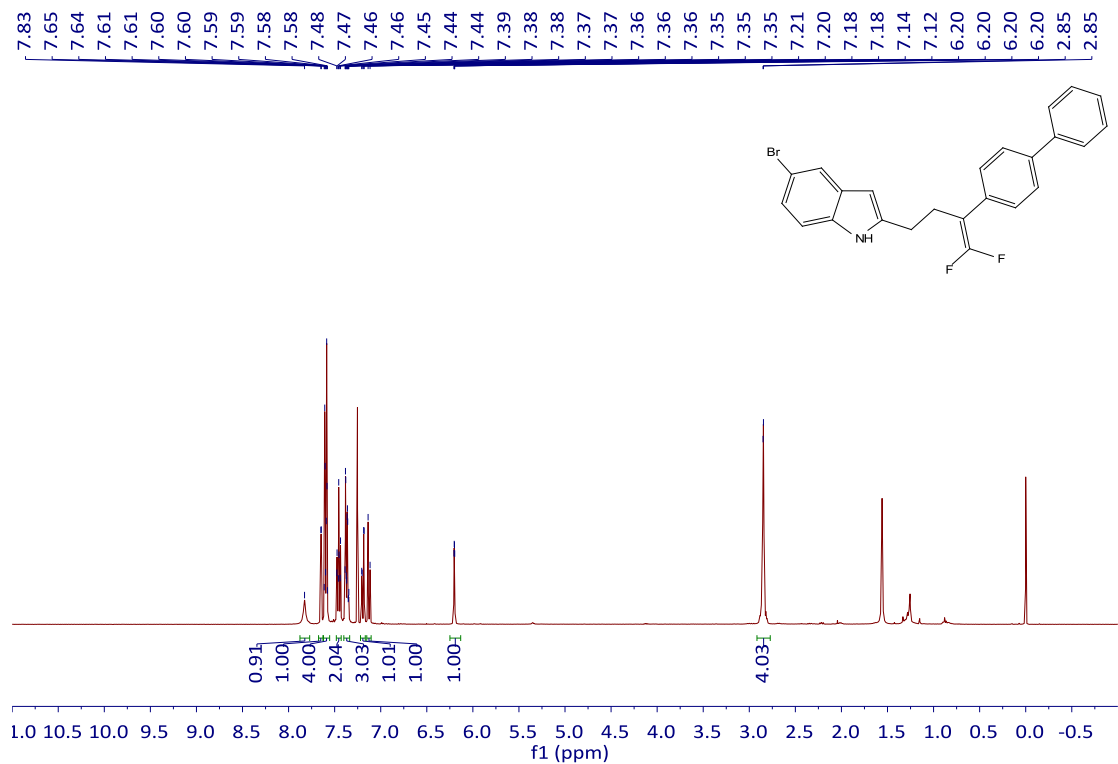

<sup>1</sup>H NMR of **3y** (400 Hz, CDCl<sub>3</sub>)

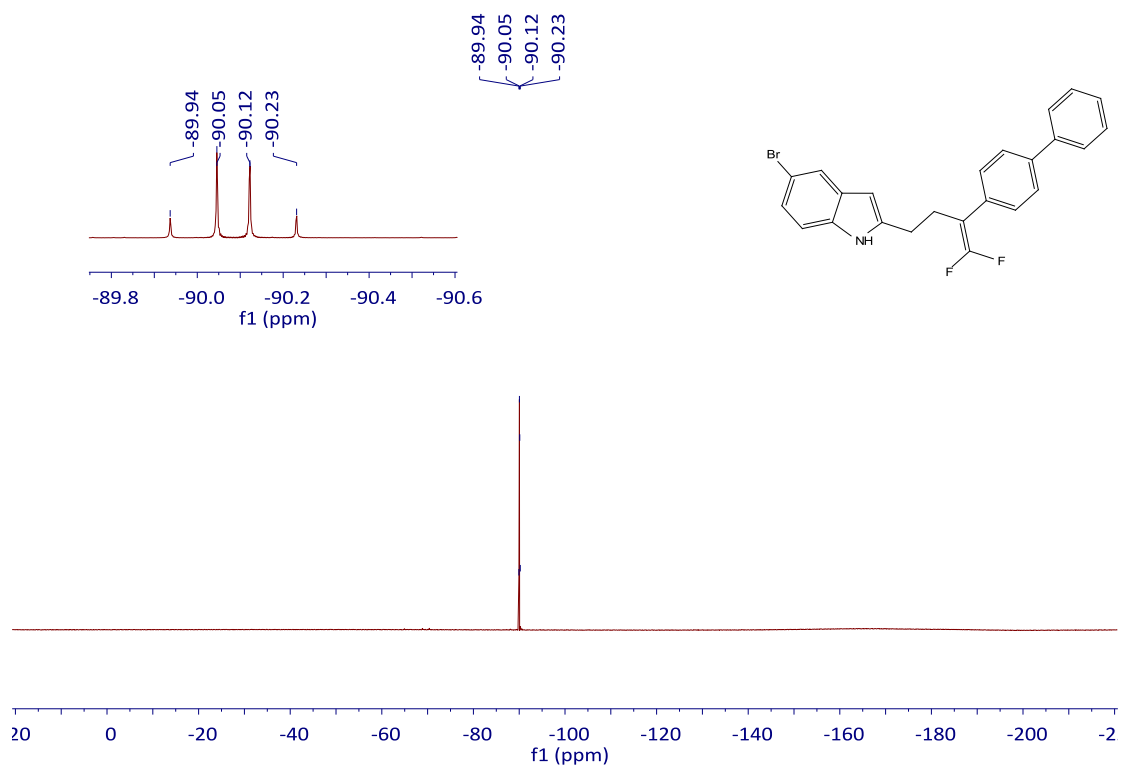

<sup>19</sup>F NMR of **3y** (376 Hz, CDCl<sub>3</sub>)

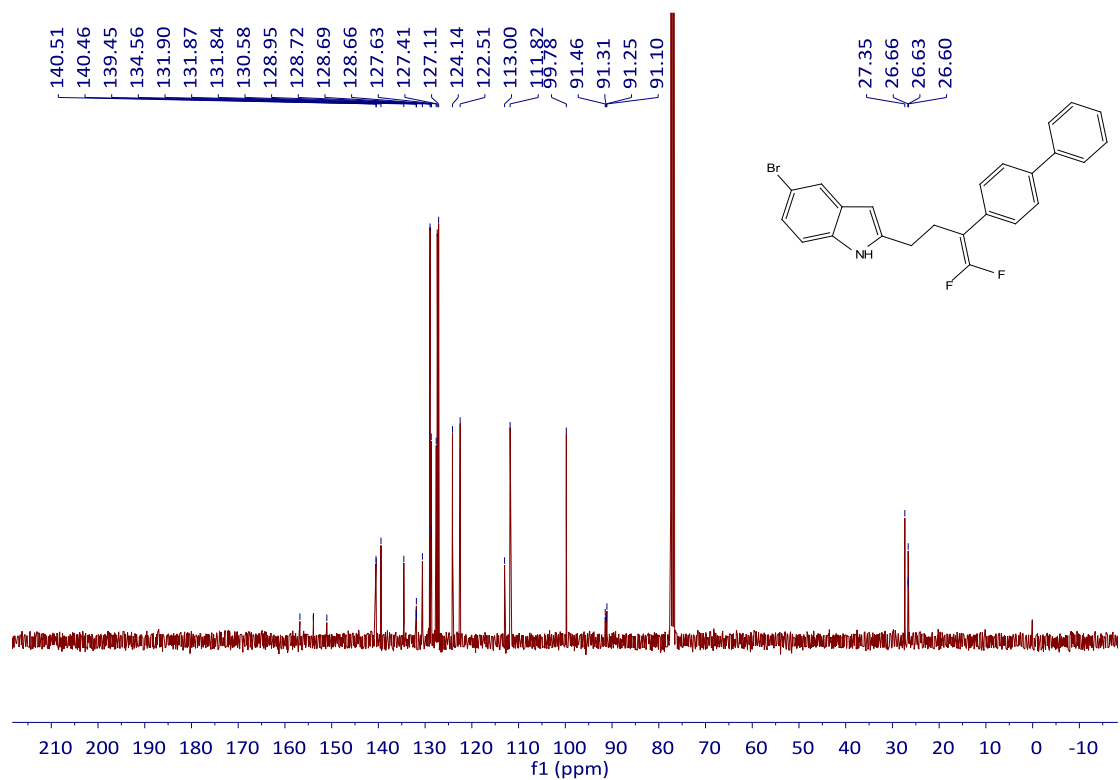

<sup>13</sup>C{<sup>1</sup>H} NMR of **3y** (100 Hz, CDCl<sub>3</sub>)

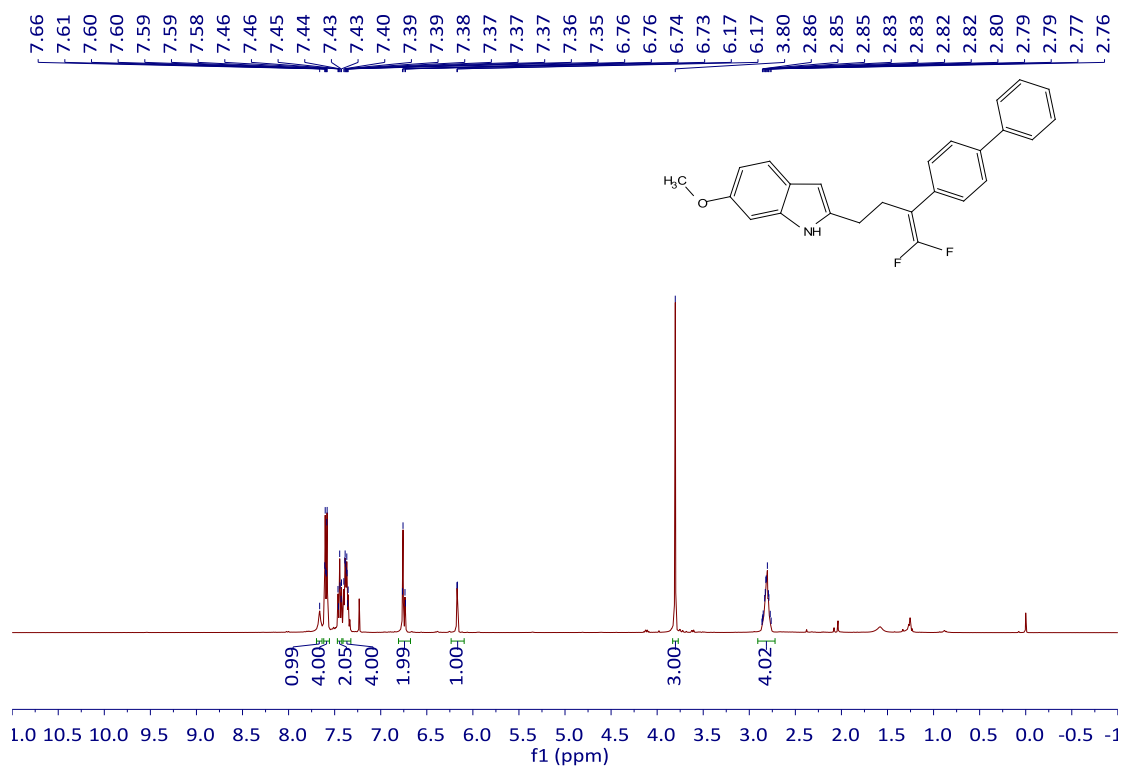

<sup>1</sup>H NMR of **3z** (400 Hz, CDCl<sub>3</sub>)



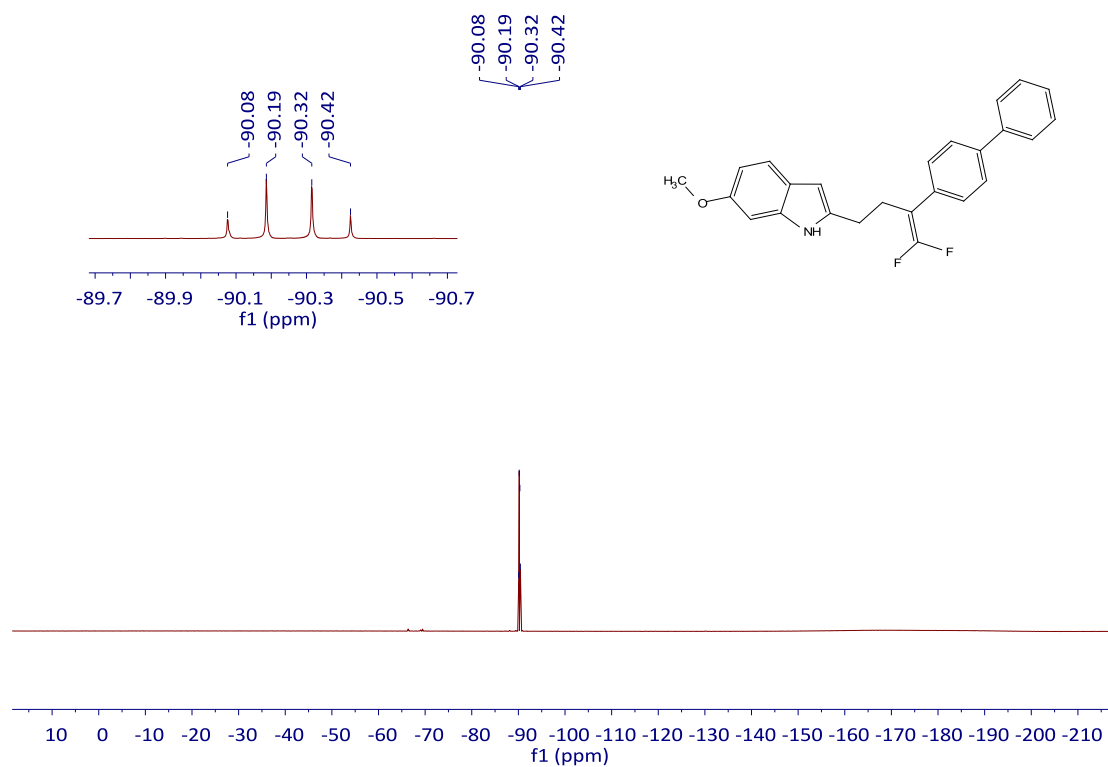

<sup>19</sup>F NMR of **3z** (376 Hz, CDCl<sub>3</sub>)

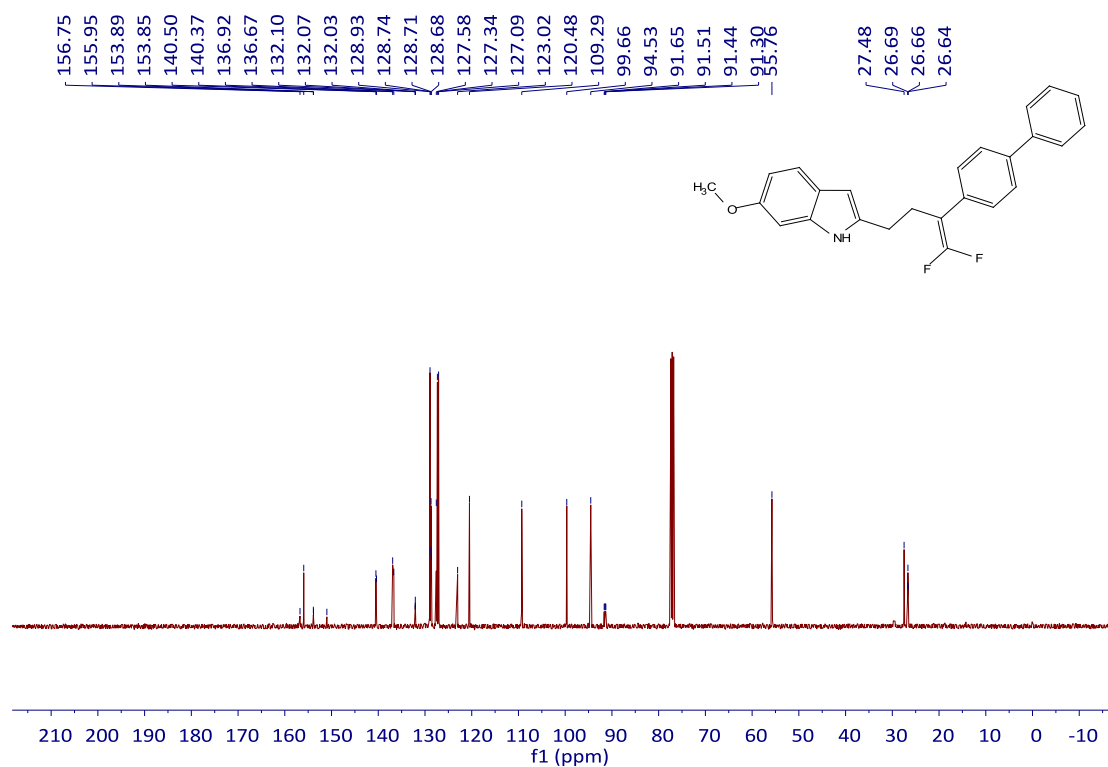

<sup>13</sup>C{<sup>1</sup>H} NMR of **3z** (100 Hz, CDCl<sub>3</sub>)

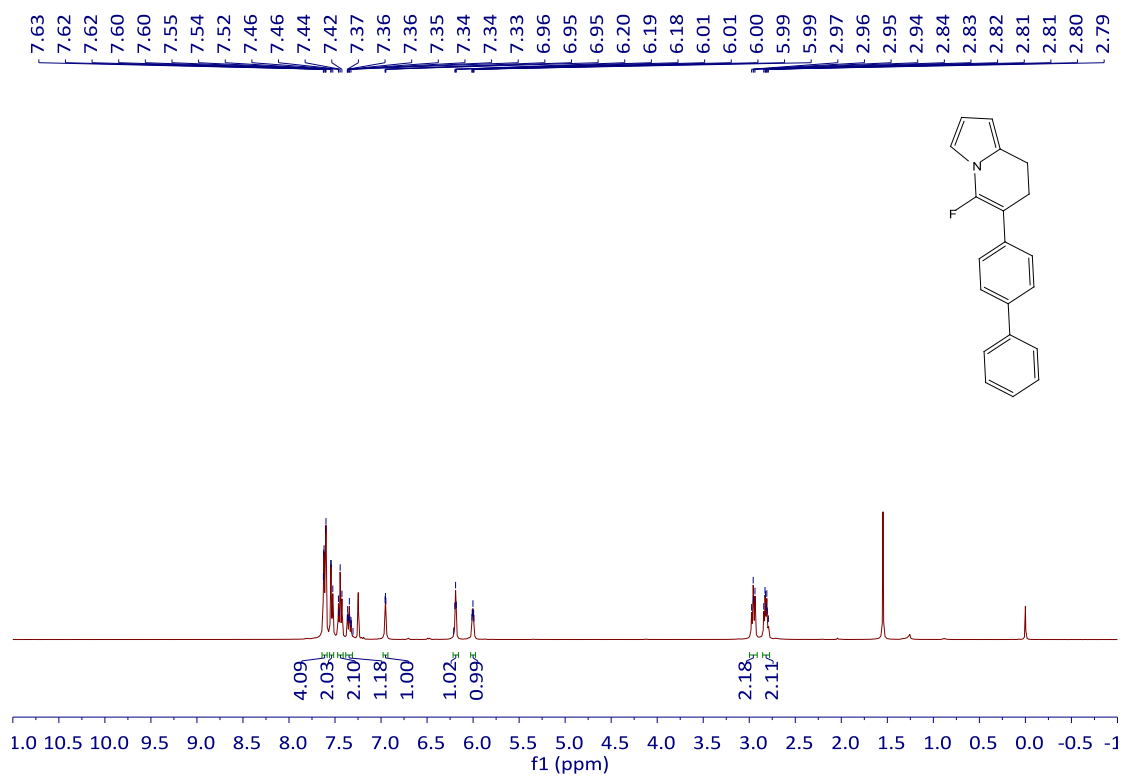

<sup>1</sup>H NMR of **4a** (400 Hz, CDCl<sub>3</sub>)

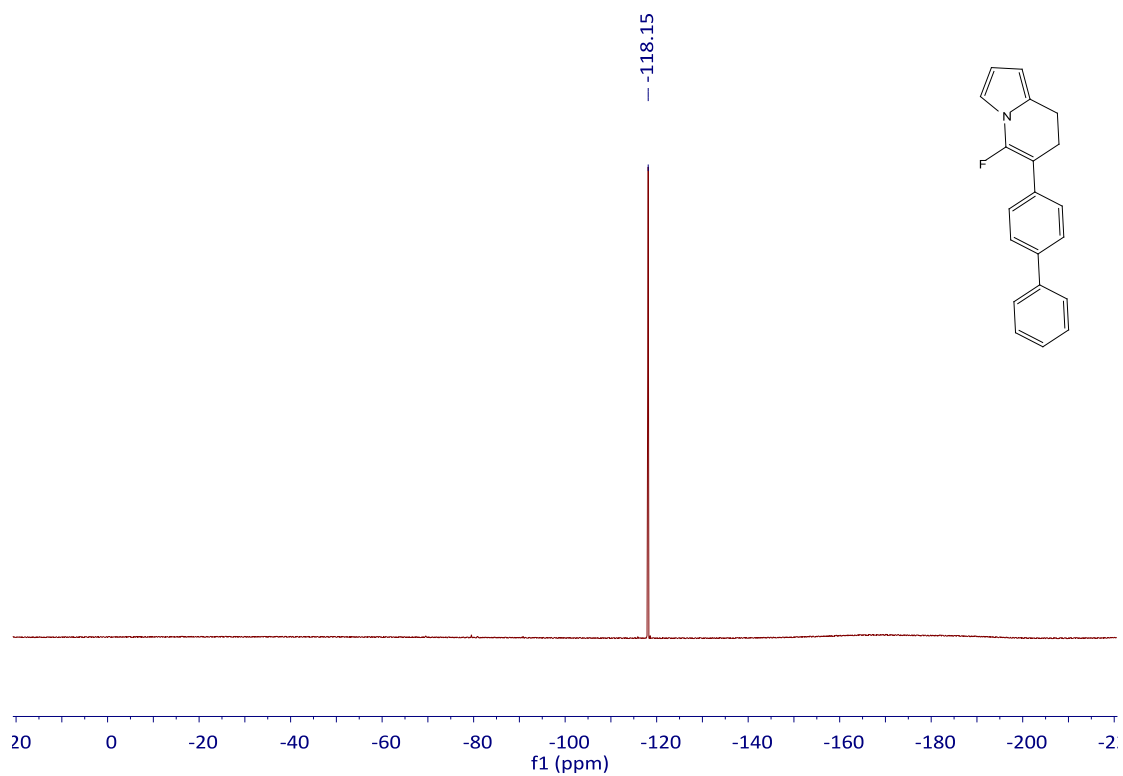

<sup>19</sup>F NMR of **4a** (376 Hz, CDCl<sub>3</sub>)

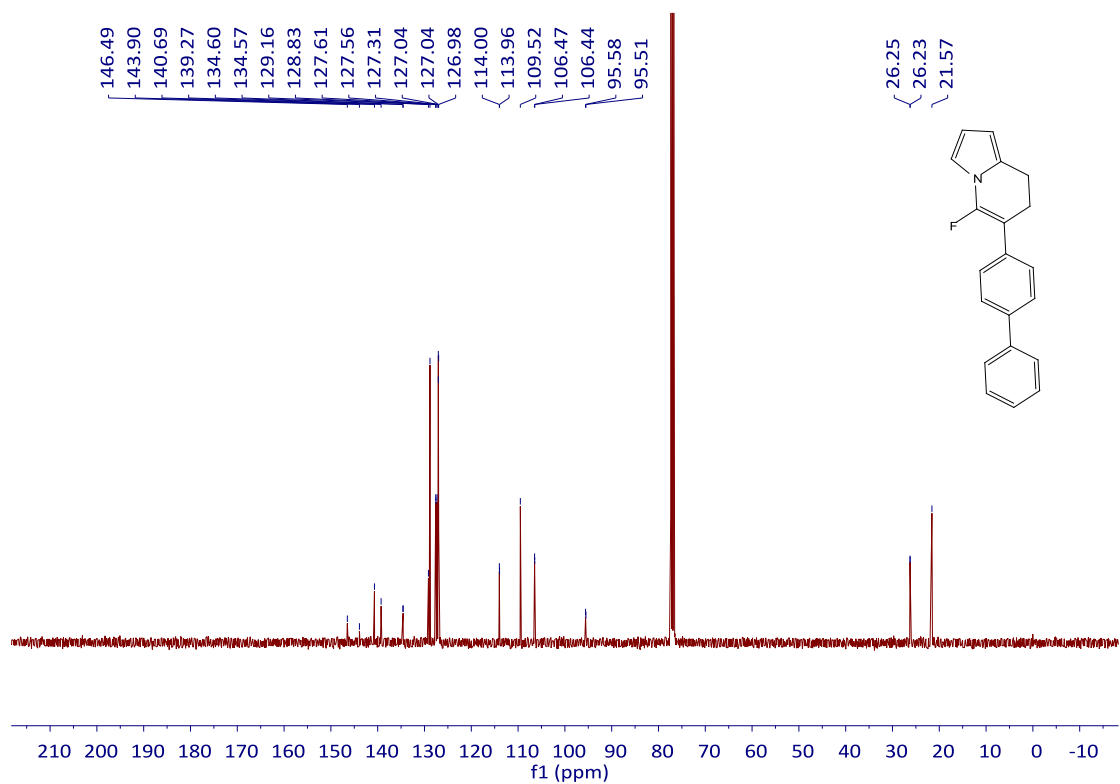

$^{13}\text{C}\{^1\text{H}\}$  NMR of **4a** (100 Hz,  $\text{CDCl}_3$ )

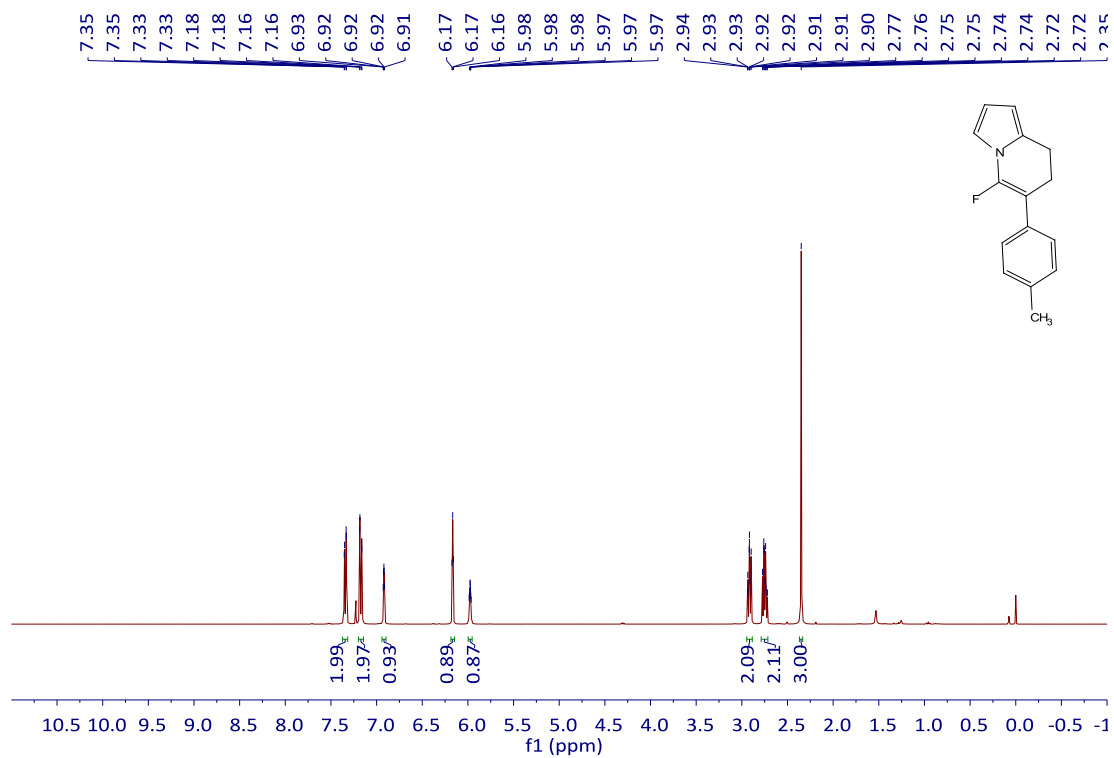

$^1\text{H}$  NMR of **4b** (400 Hz,  $\text{CDCl}_3$ )

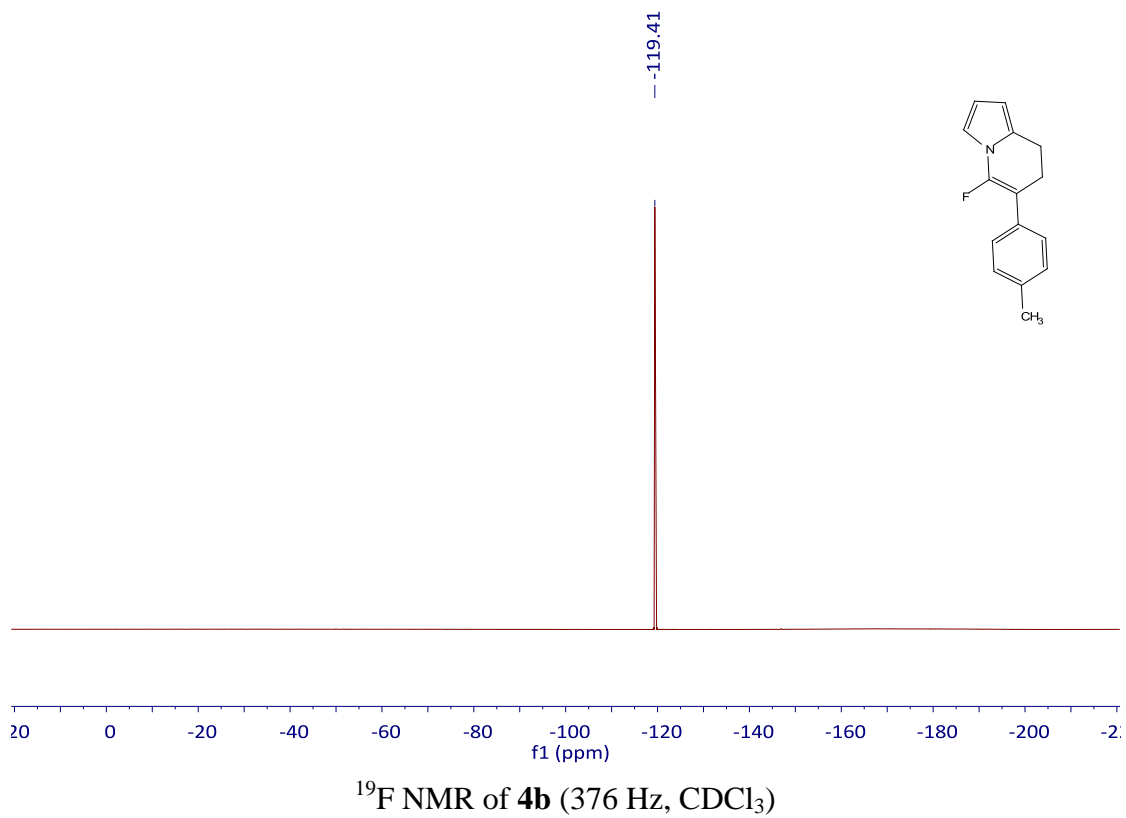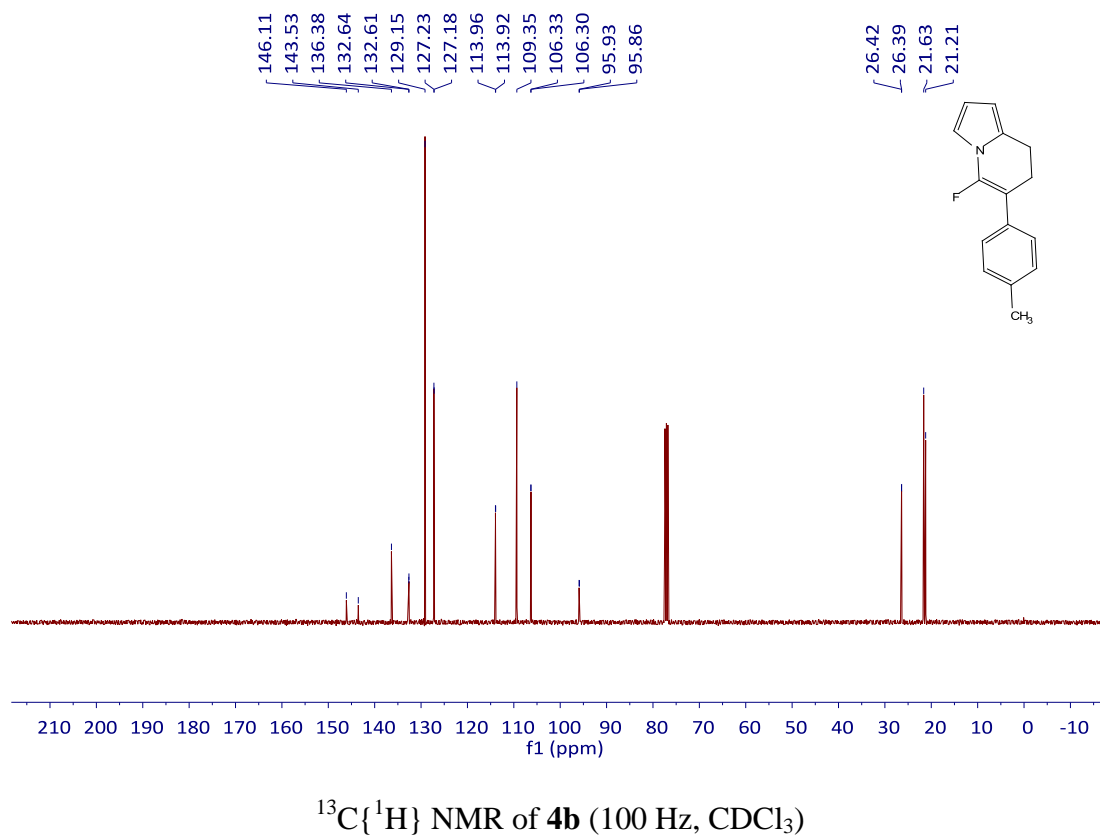

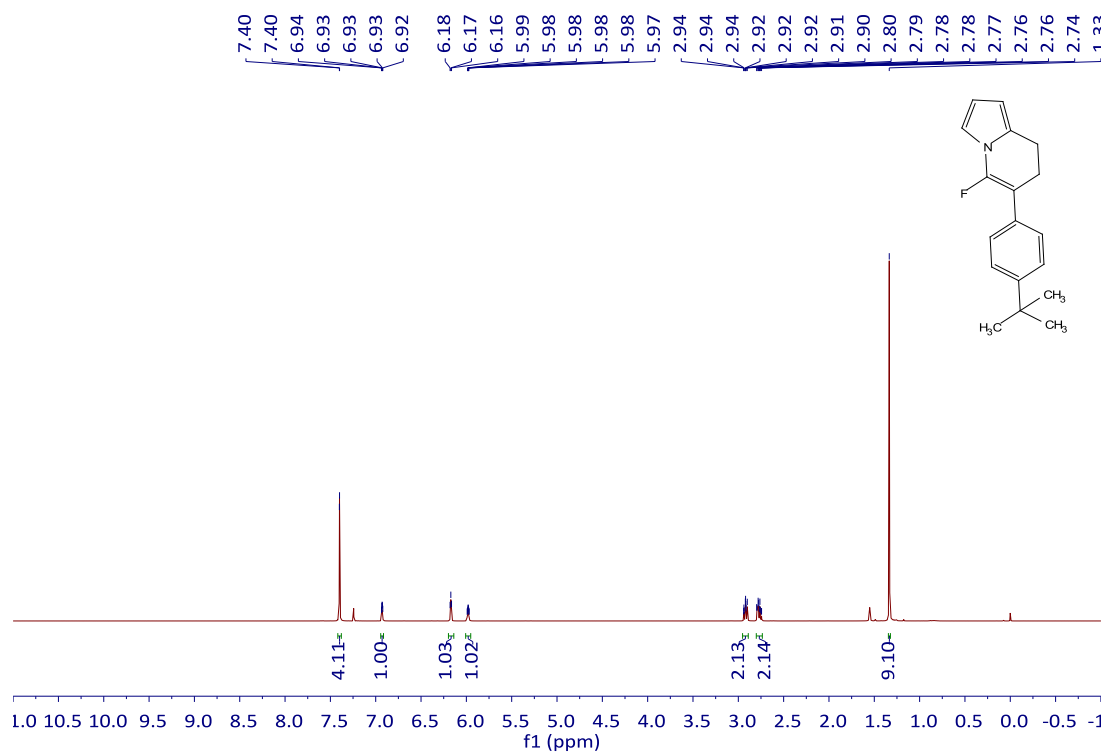

<sup>1</sup>H NMR of **4c** (400 Hz, CDCl<sub>3</sub>)

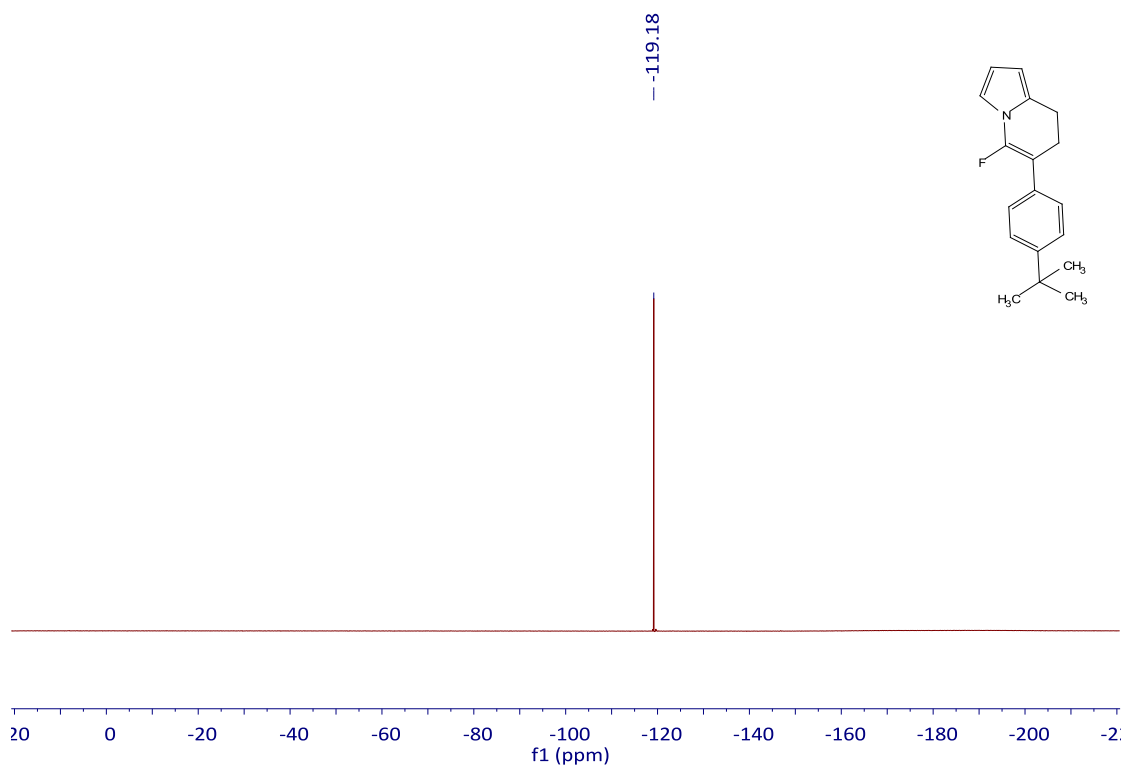

<sup>19</sup>F NMR of **4c** (376 Hz, CDCl<sub>3</sub>)

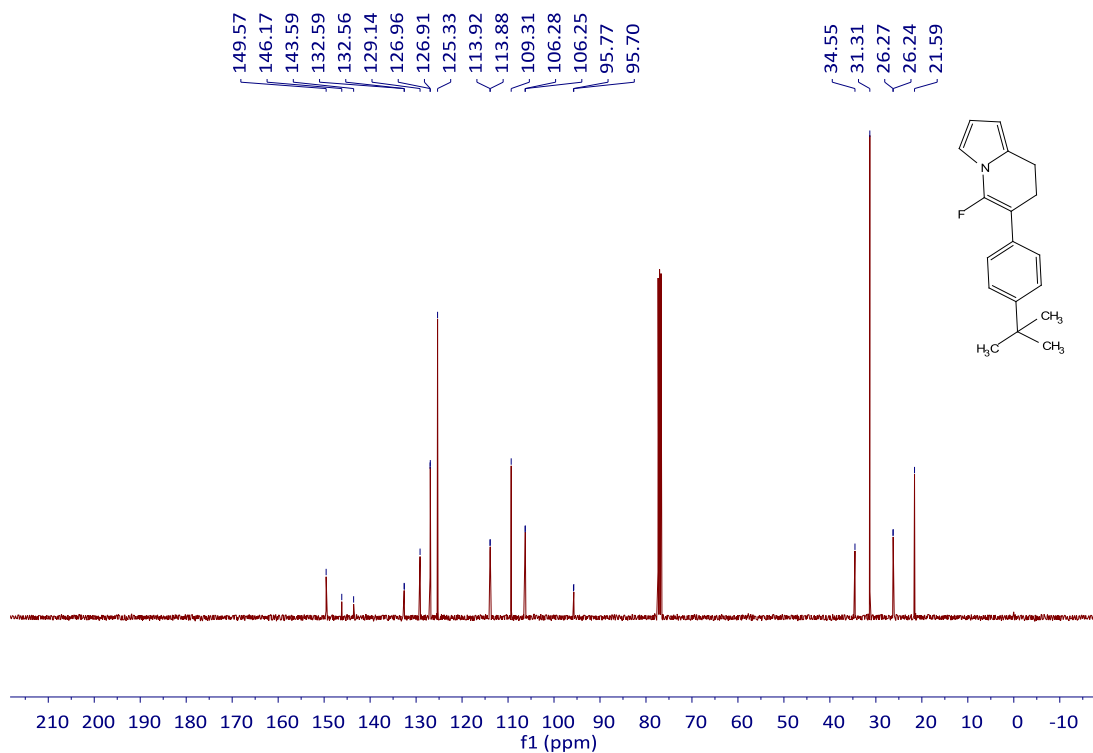

$^{13}\text{C}\{^1\text{H}\}$  NMR of **4c** (100 Hz,  $\text{CDCl}_3$ )

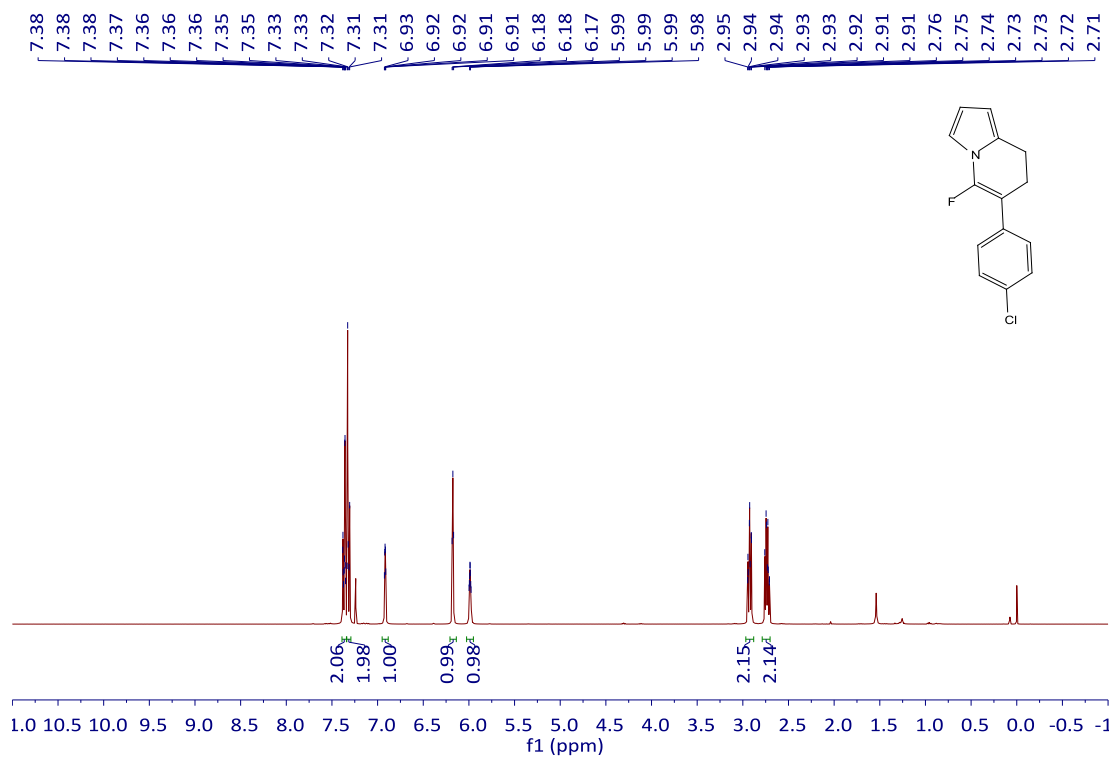

$^1\text{H}$  NMR of **4d** (400 Hz,  $\text{CDCl}_3$ )

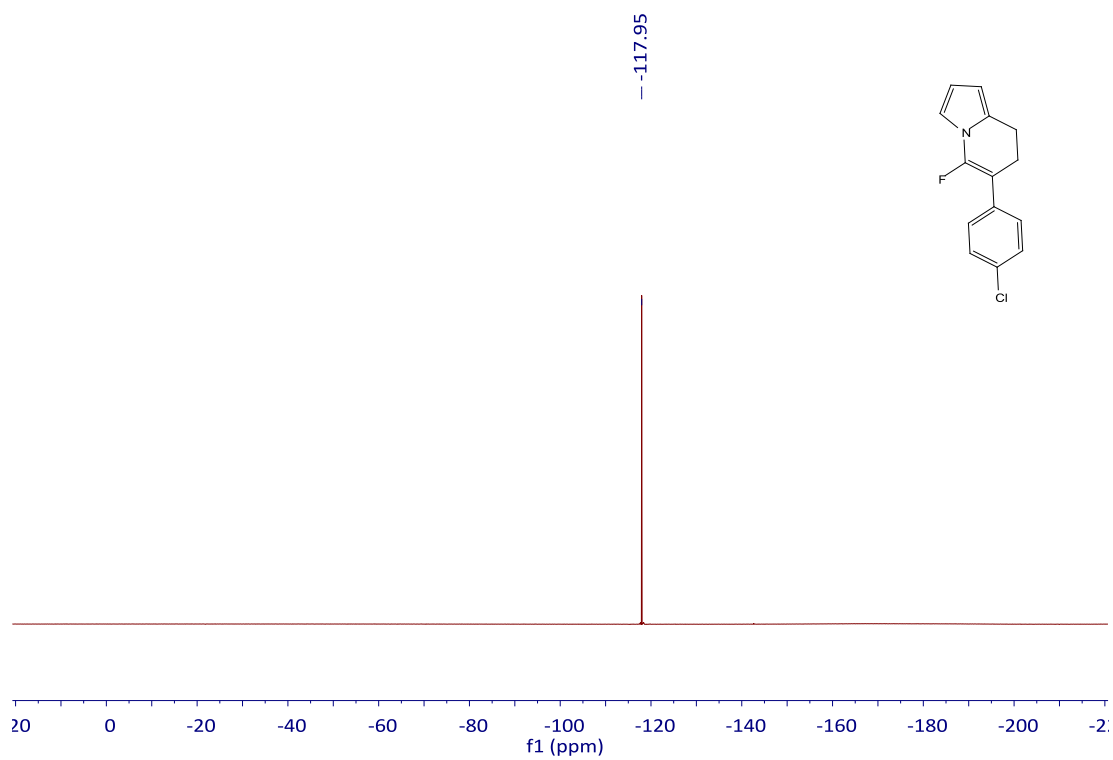

$^{19}\text{F}$  NMR of **4d** (376 Hz,  $\text{CDCl}_3$ )

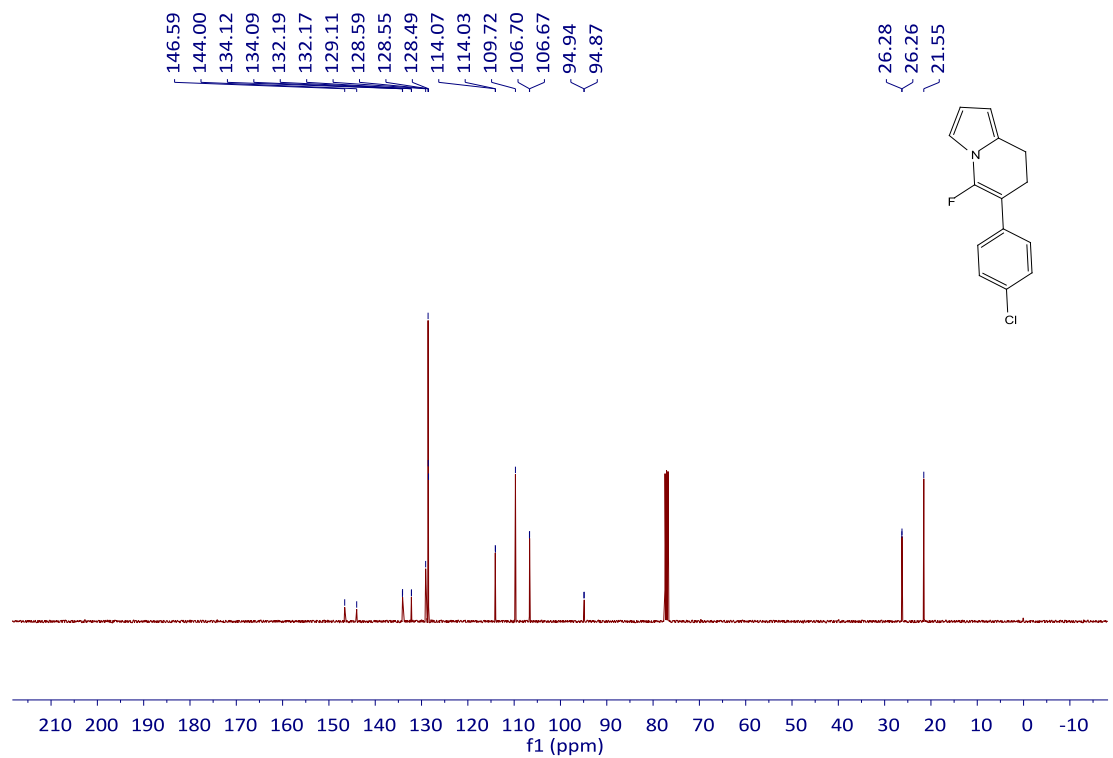

$^{13}\text{C}\{^1\text{H}\}$  NMR of **4d** (100 Hz,  $\text{CDCl}_3$ )

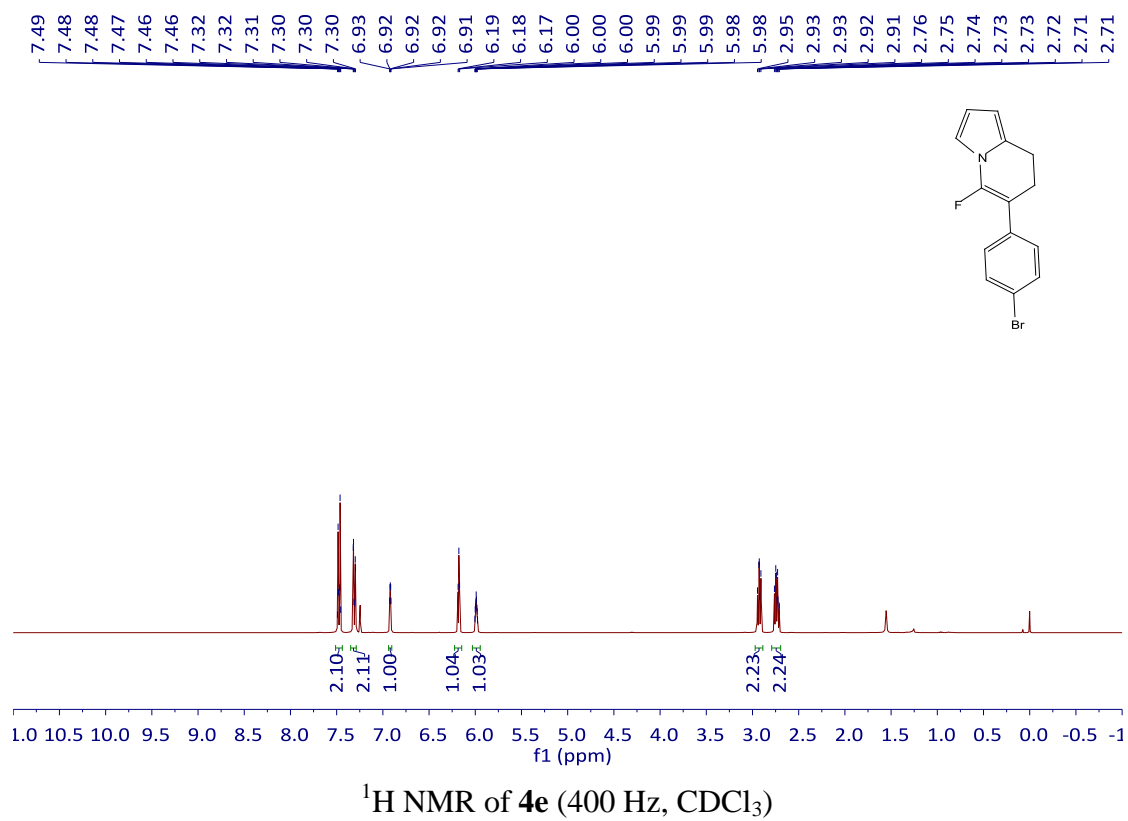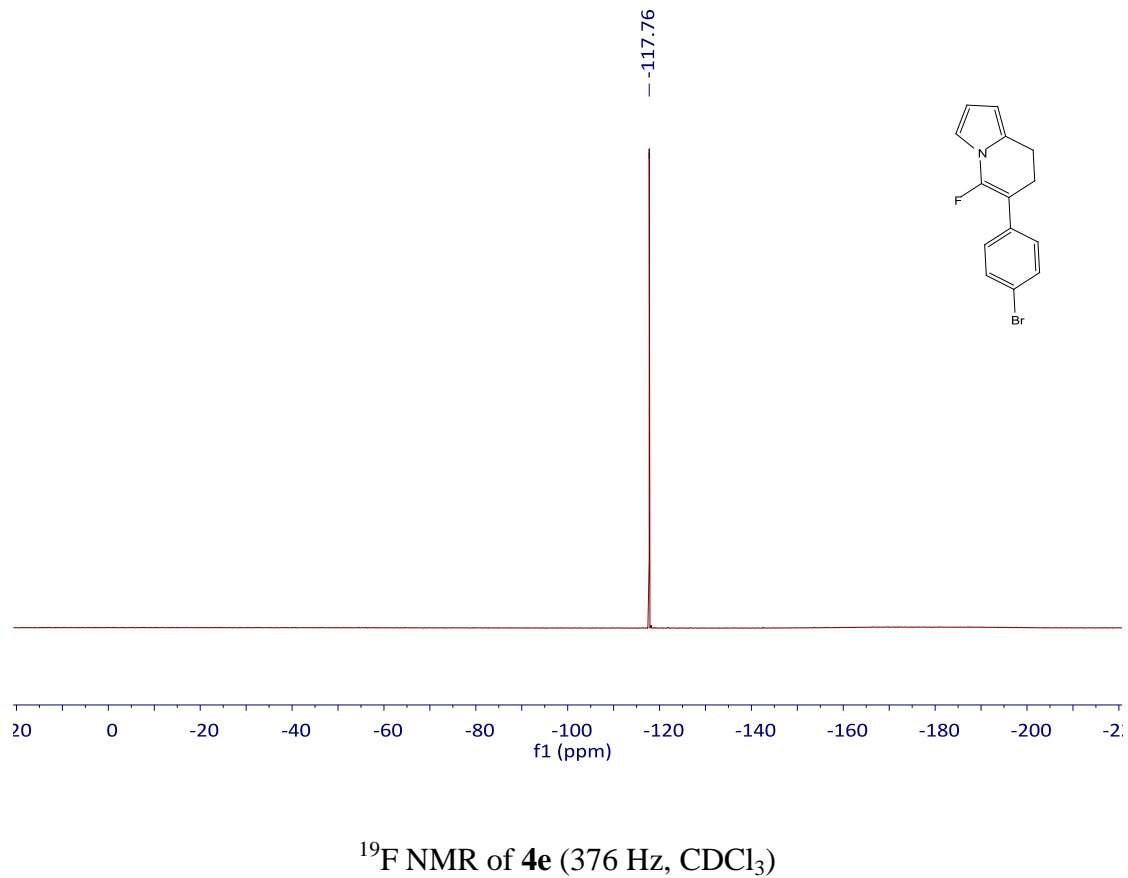



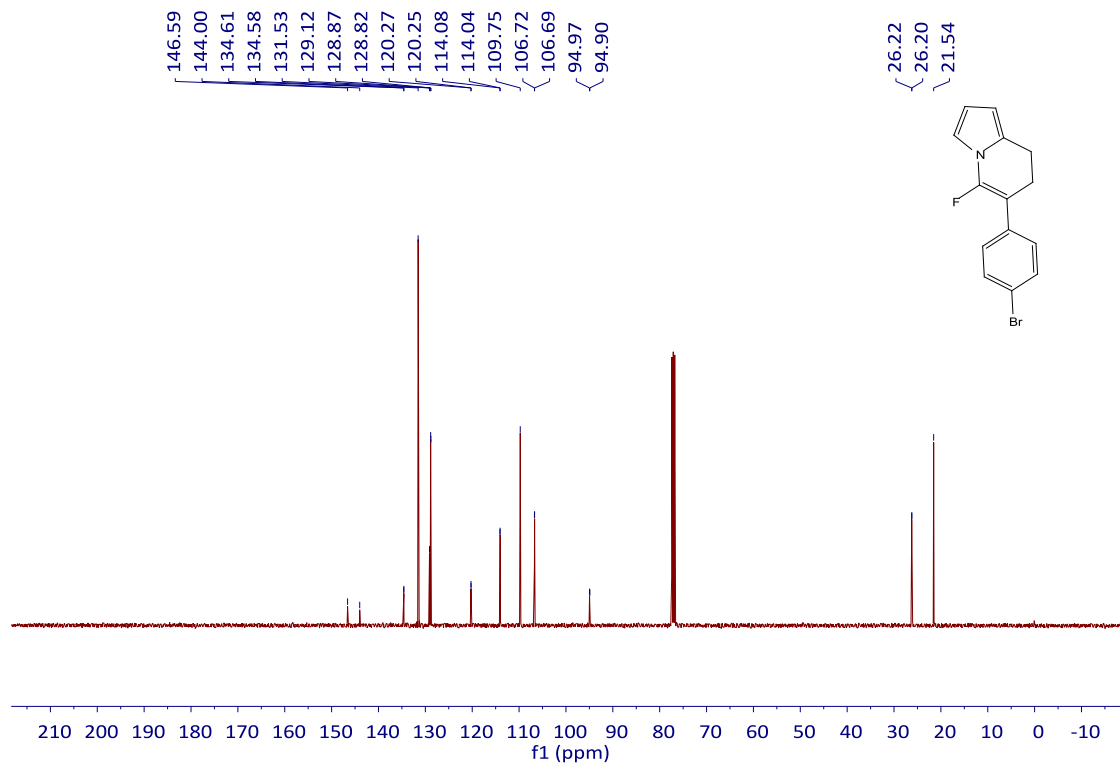

$^{13}\text{C}\{^1\text{H}\}$  NMR of **4e** (100 Hz,  $\text{CDCl}_3$ )

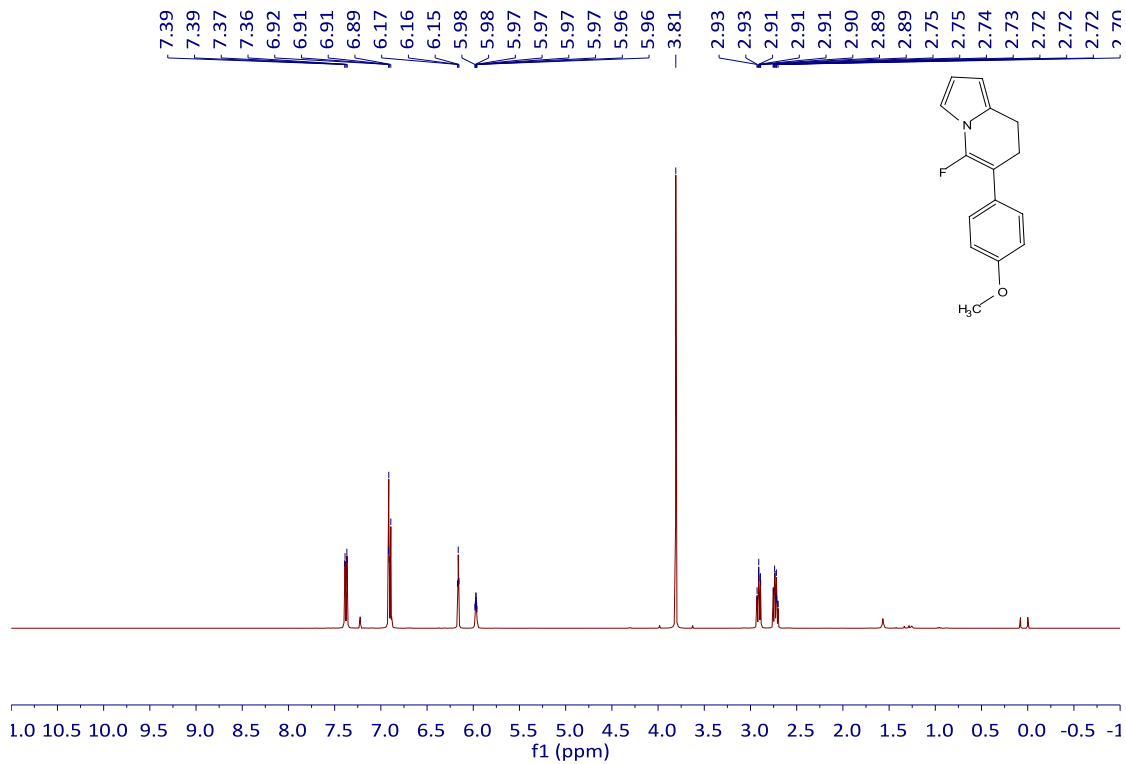

$^1\text{H}$  NMR of **4f** (400 Hz,  $\text{CDCl}_3$ )

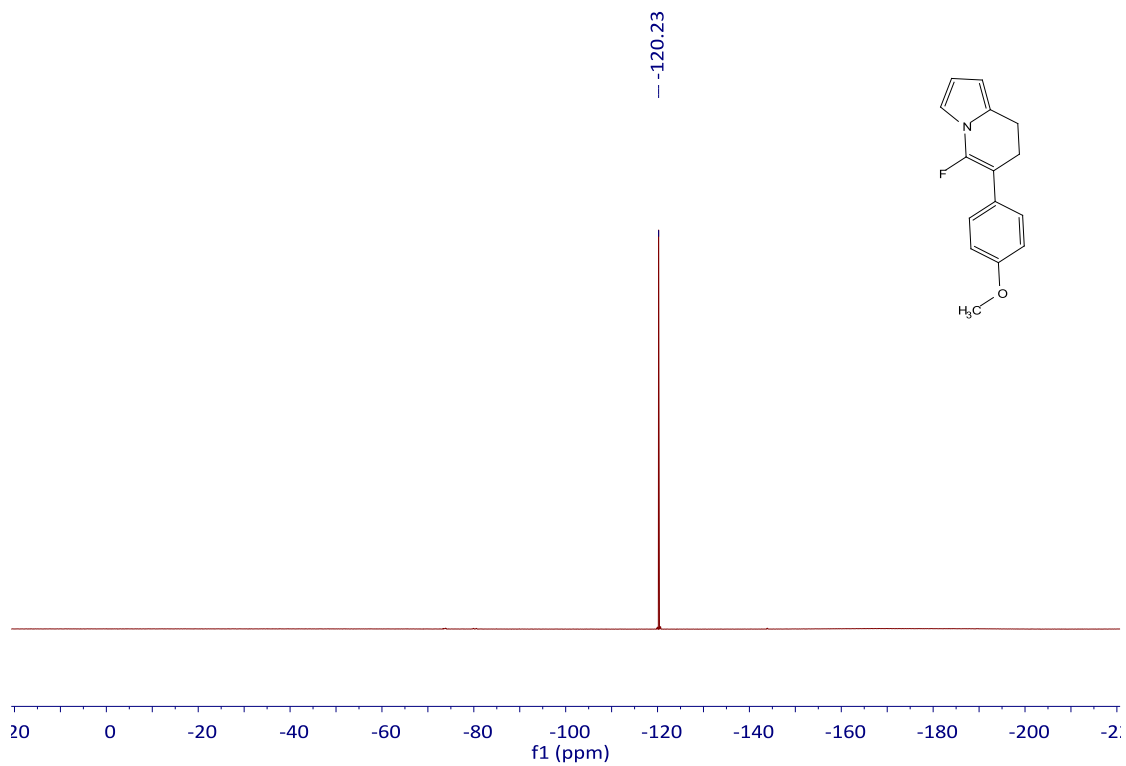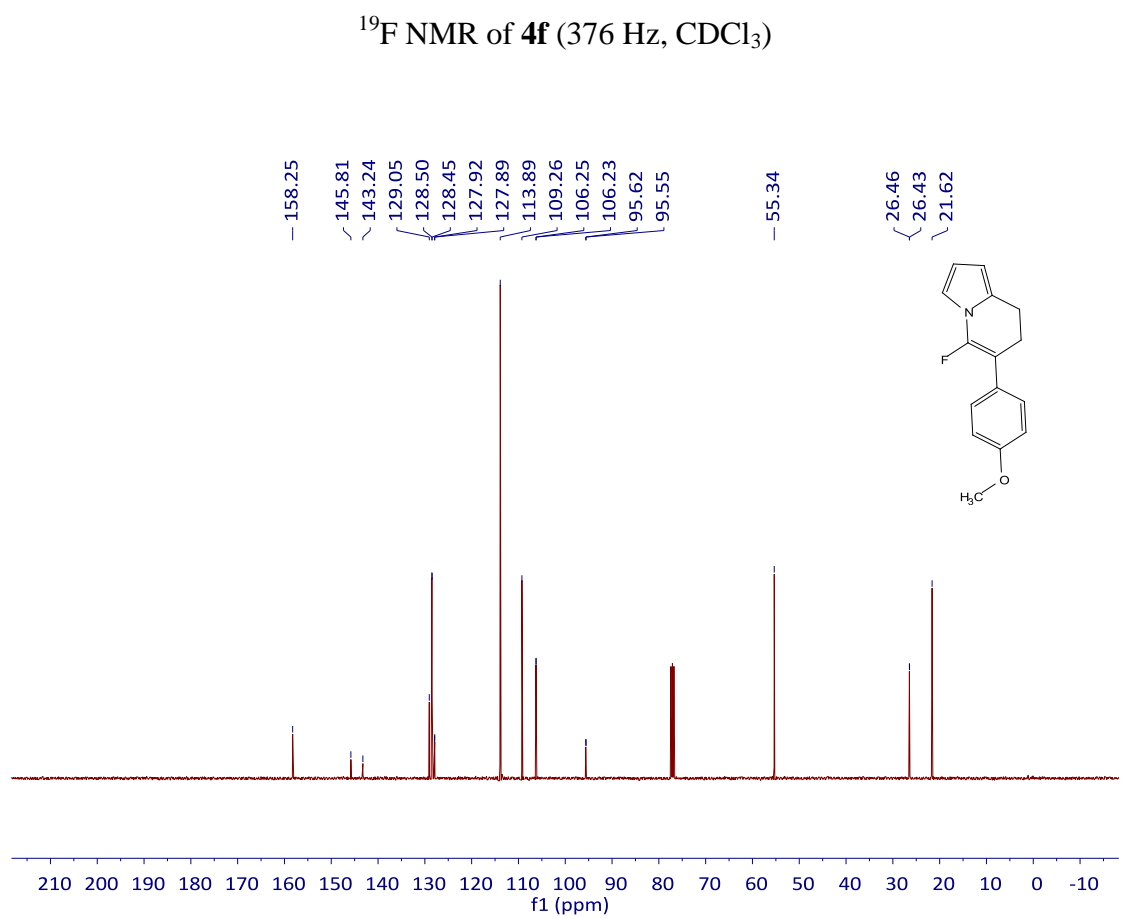

$^{13}\text{C}\{^1\text{H}\}$  NMR of **4f** (100 Hz,  $\text{CDCl}_3$ )

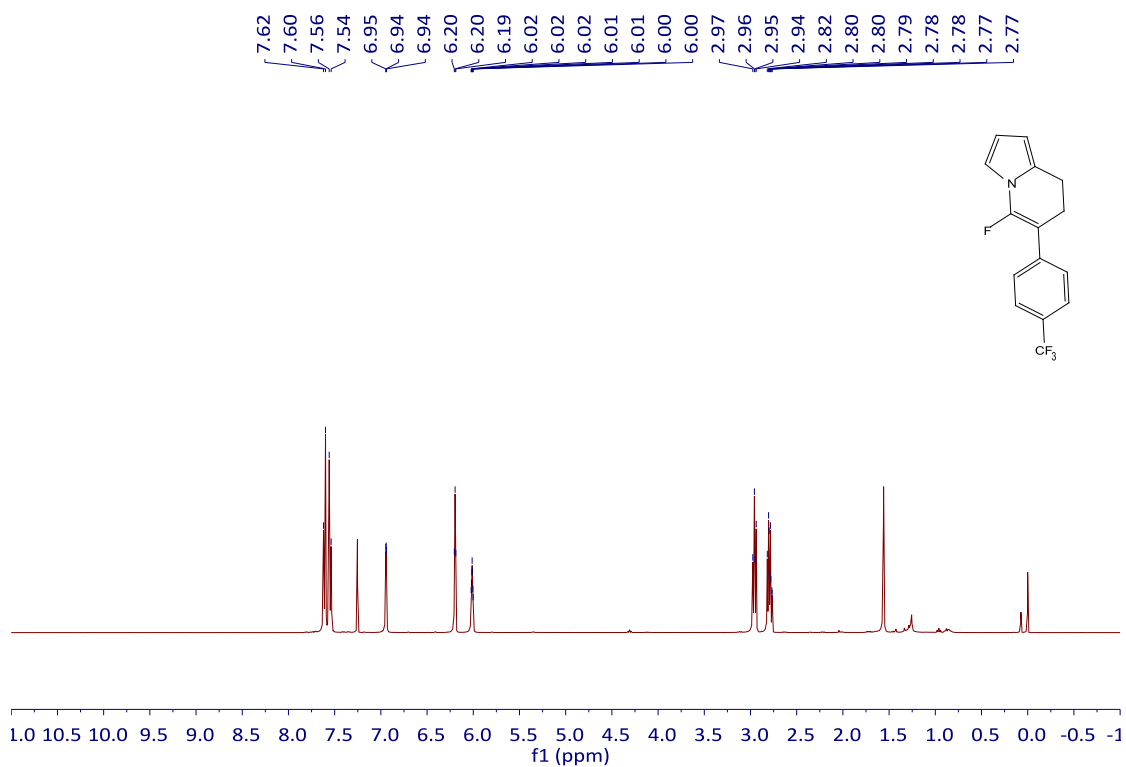

<sup>1</sup>H NMR of **4g** (400 Hz, CDCl<sub>3</sub>)

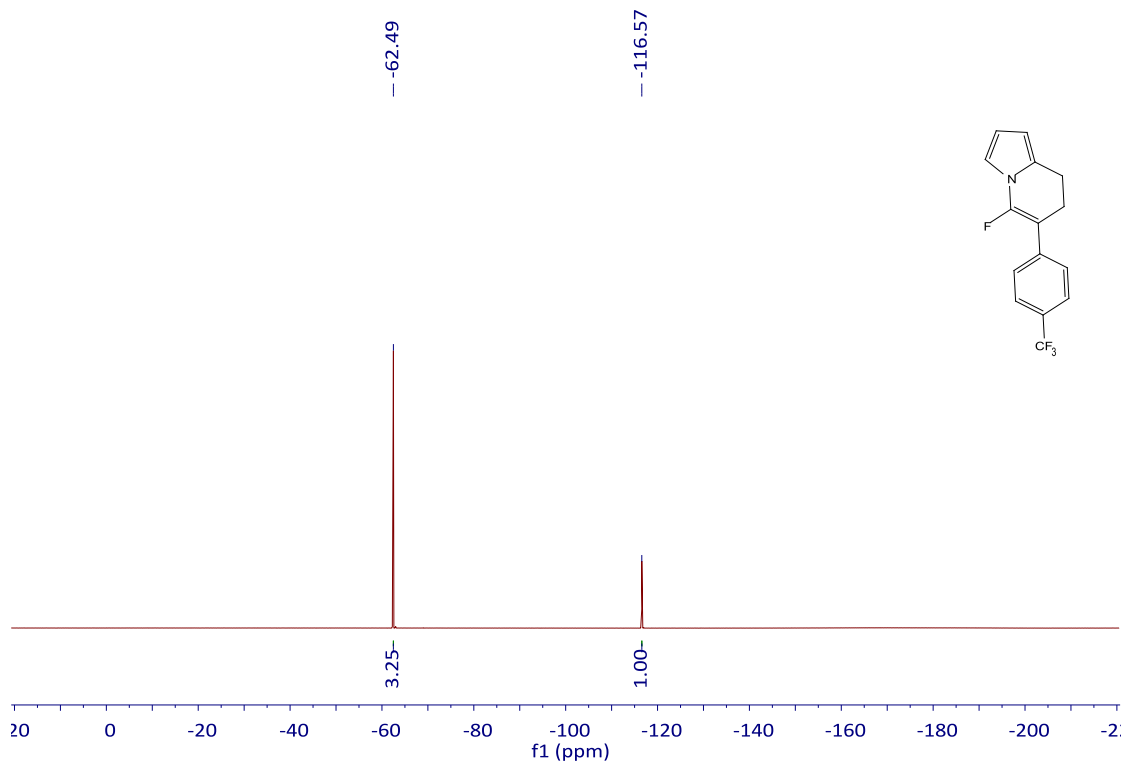

<sup>19</sup>F NMR of **4g** (376 Hz, CDCl<sub>3</sub>)

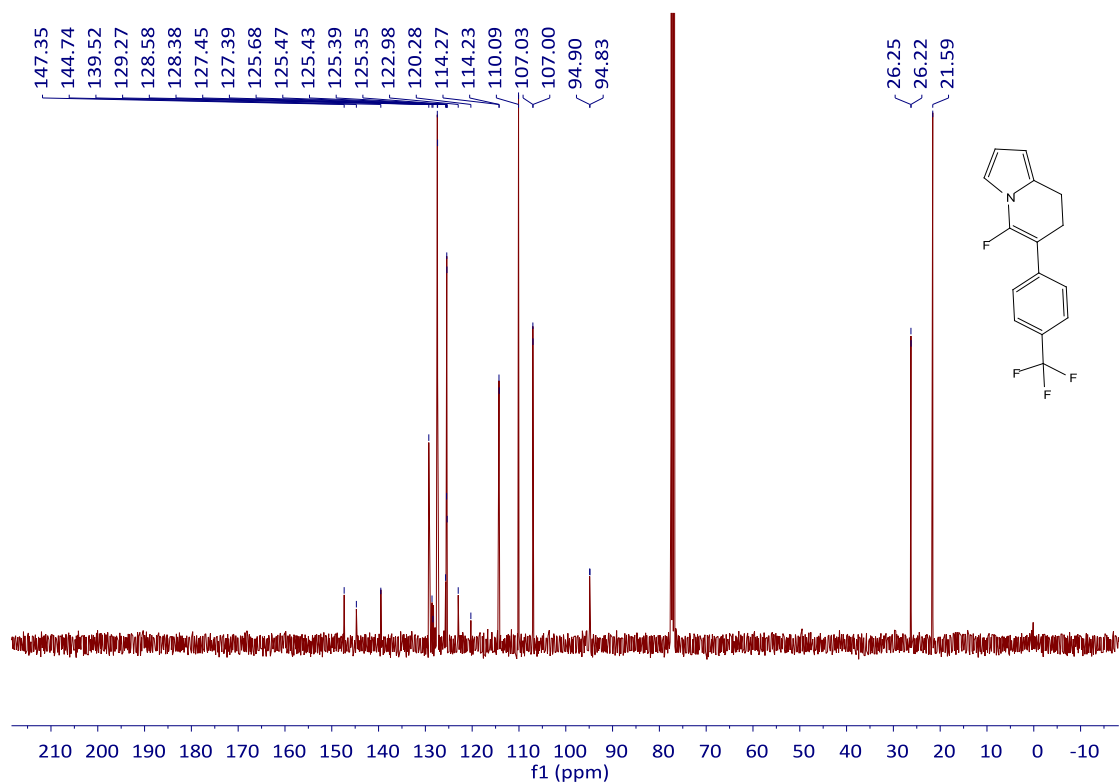

<sup>13</sup>C{<sup>1</sup>H} NMR of **4g** (100 Hz, CDCl<sub>3</sub>)

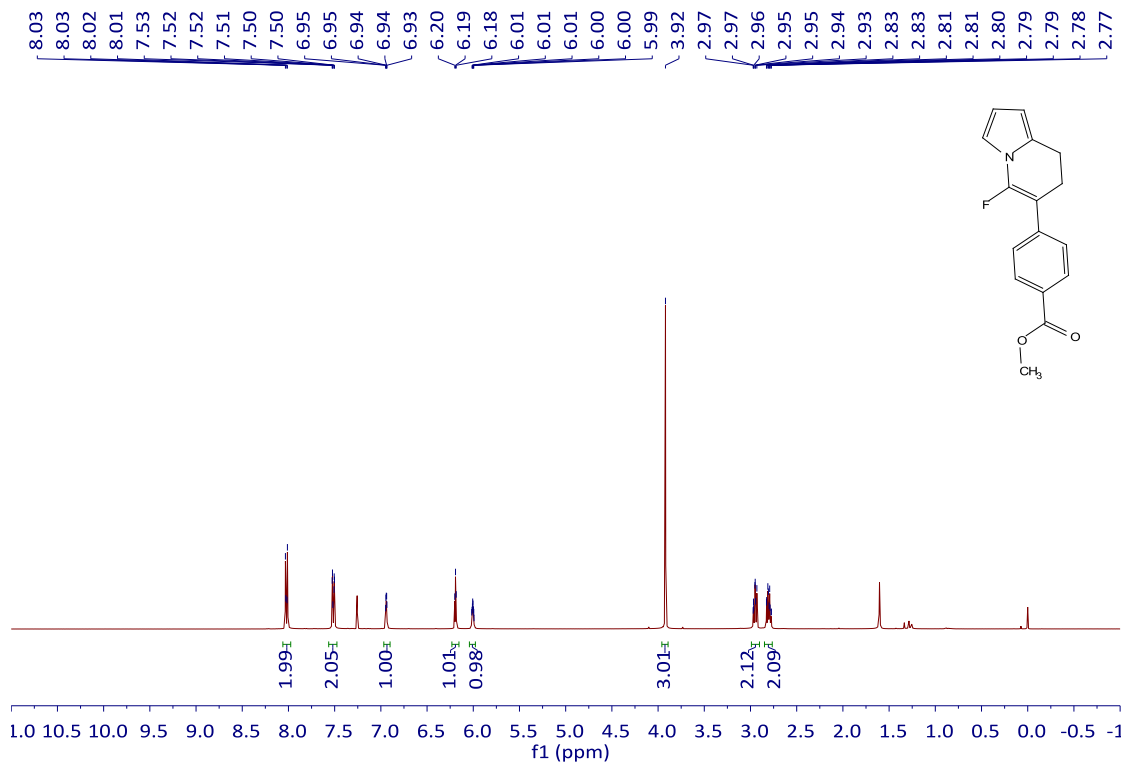

<sup>1</sup>H NMR of **4h** (400 Hz, CDCl<sub>3</sub>)

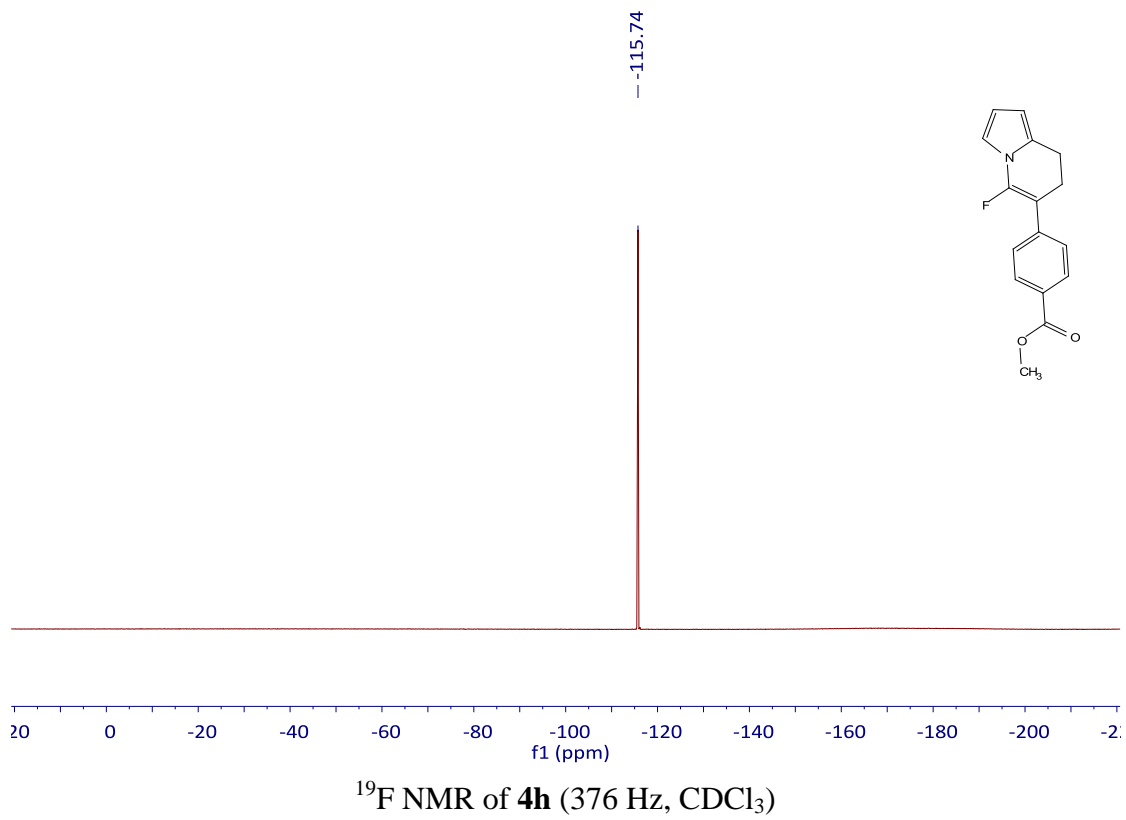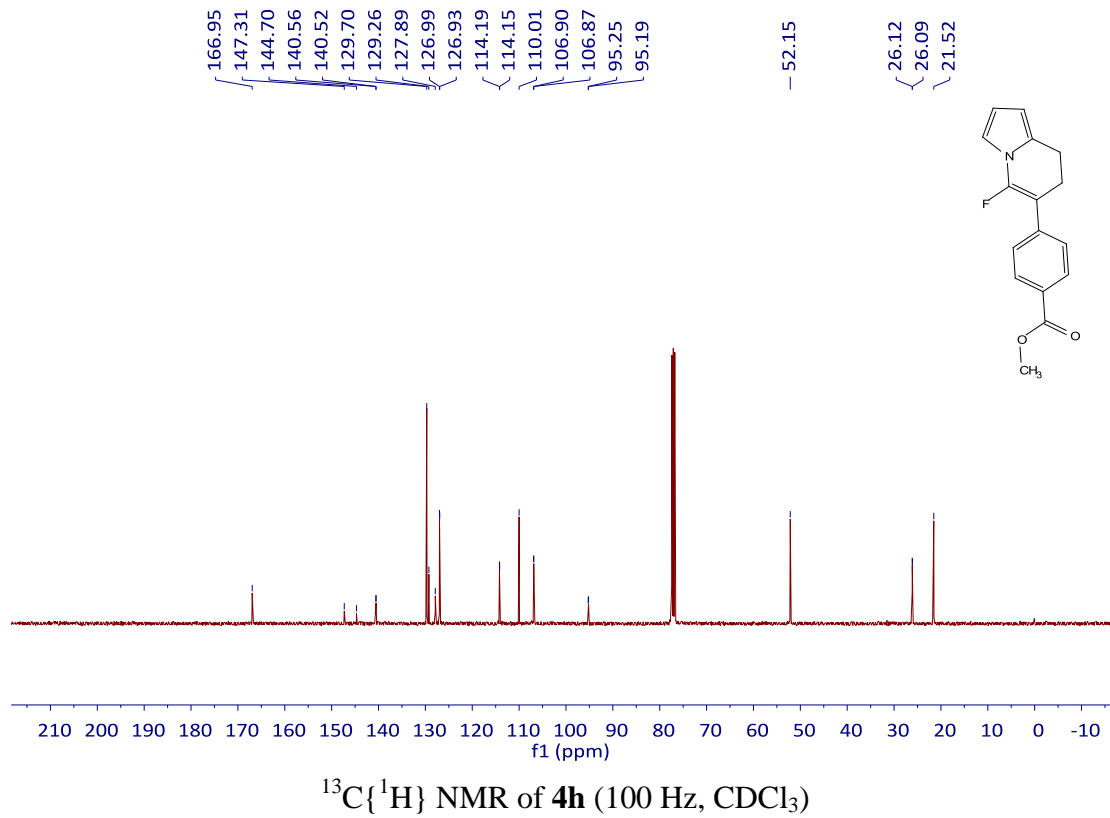

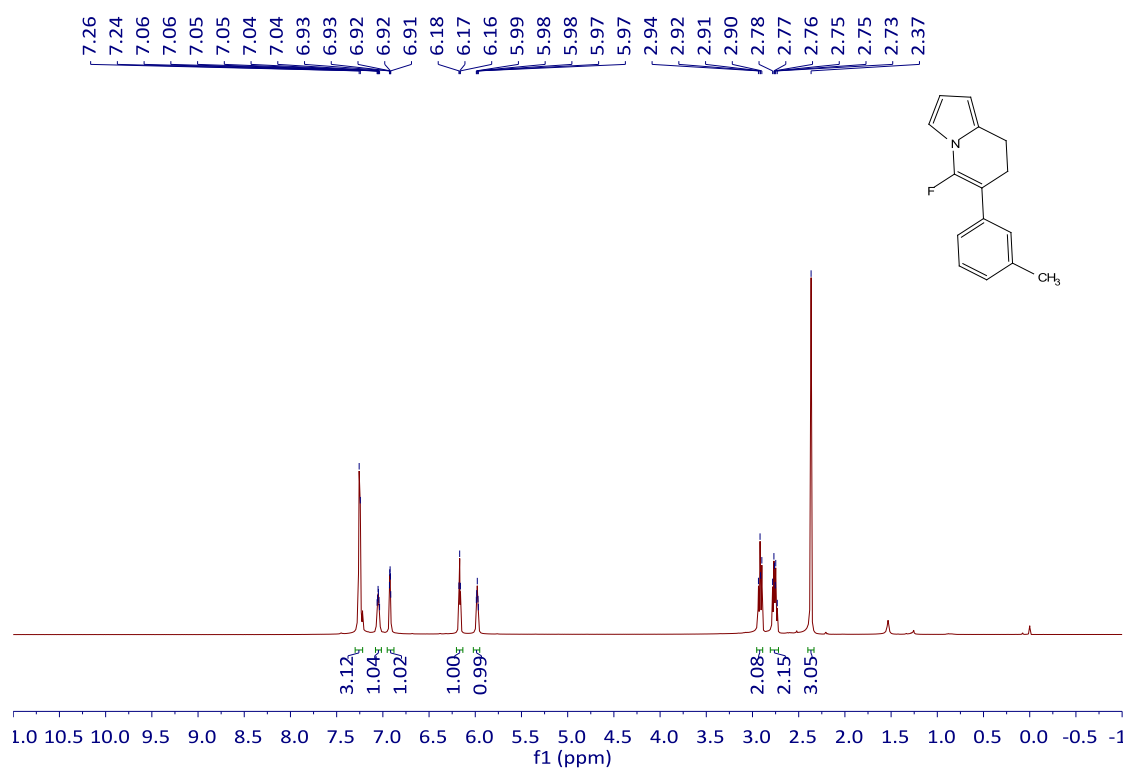

<sup>1</sup>H NMR of **4i** (400 Hz, CDCl<sub>3</sub>)

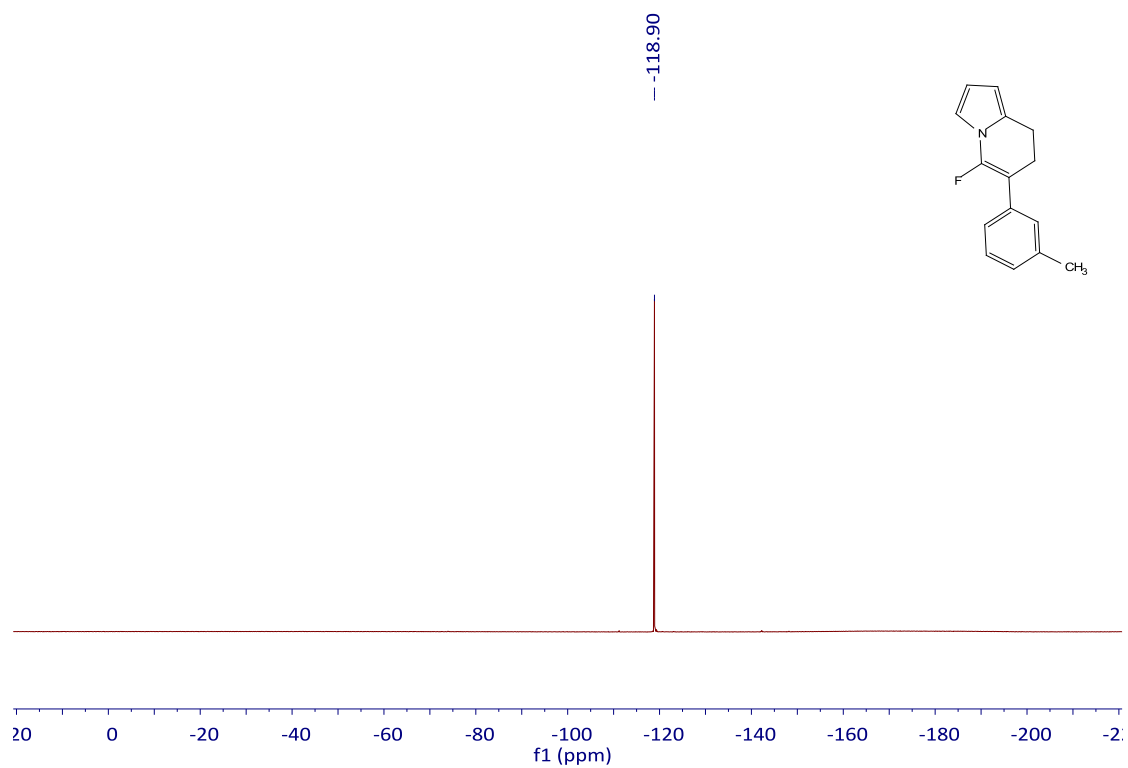

<sup>19</sup>F NMR of **4i** (376 Hz, CDCl<sub>3</sub>)

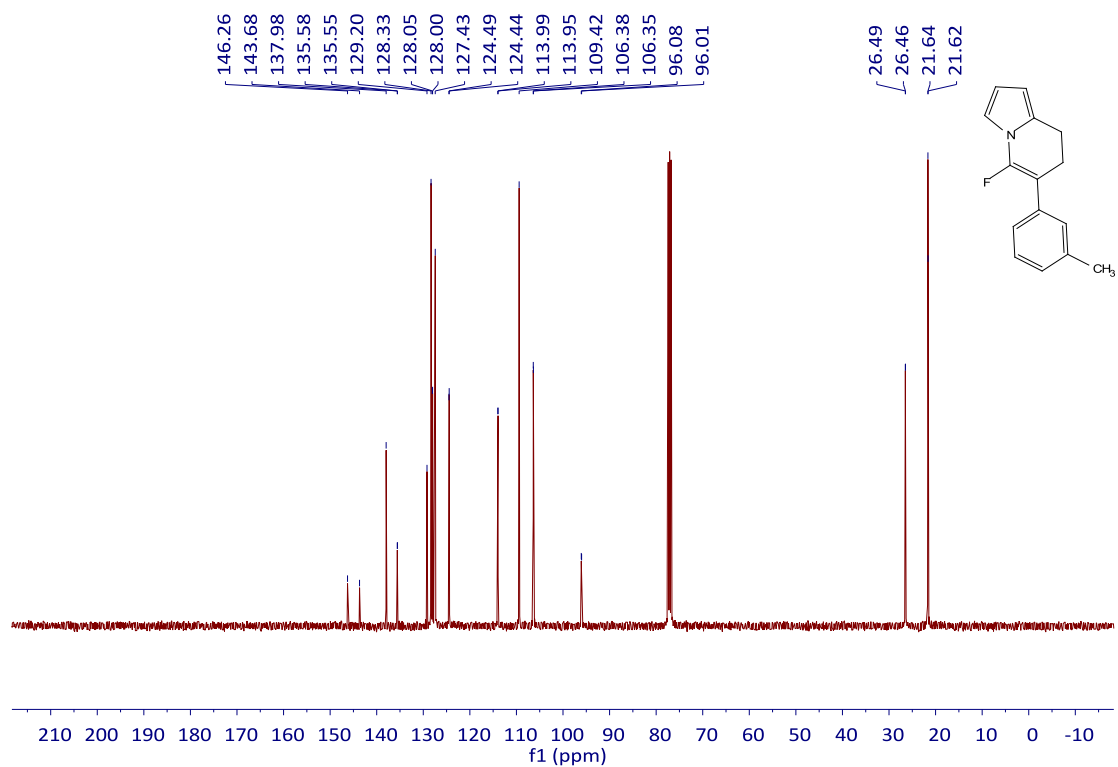

<sup>13</sup>C{<sup>1</sup>H} NMR of **4i** (100 Hz, CDCl<sub>3</sub>)

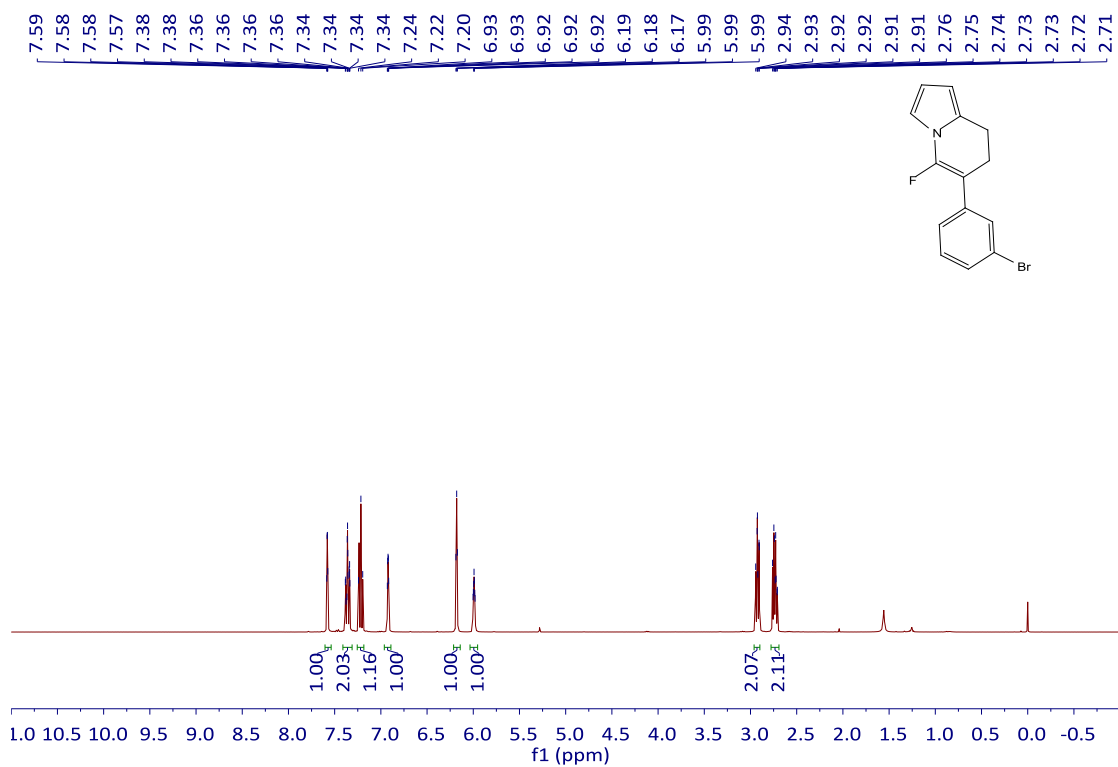

<sup>1</sup>H NMR of **4j** (400 Hz, CDCl<sub>3</sub>)

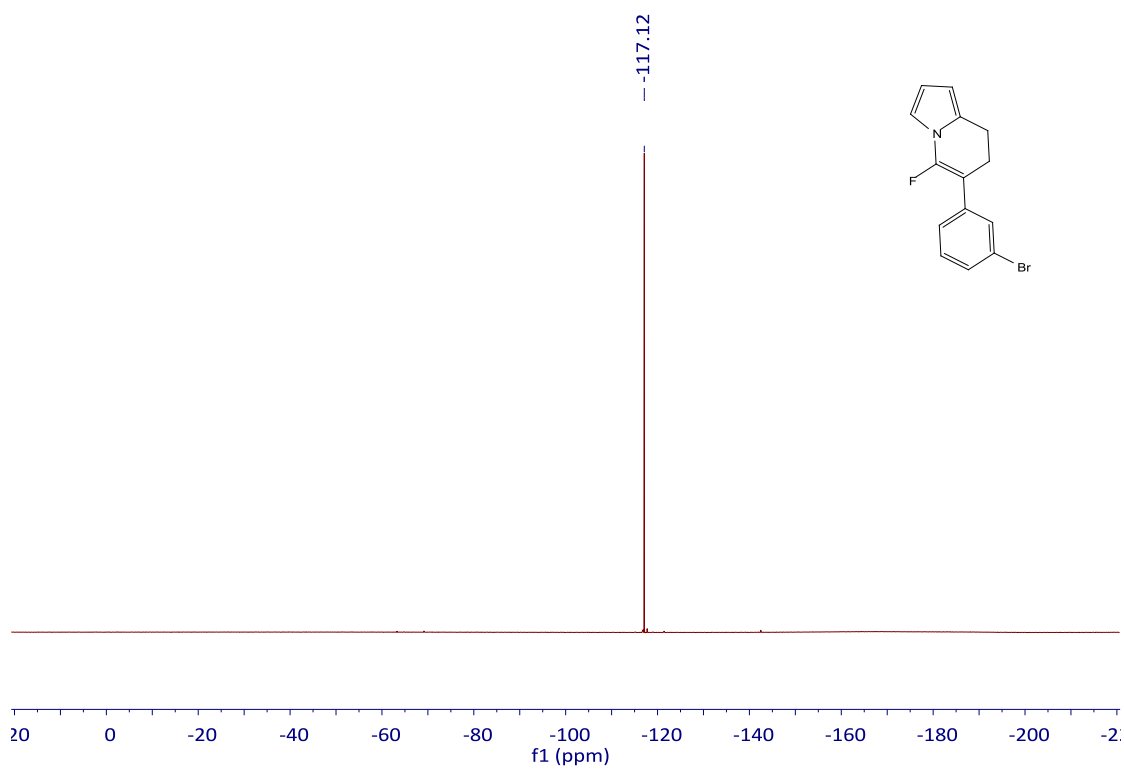

$^{19}\text{F}$  NMR of **4j** (376 Hz,  $\text{CDCl}_3$ )

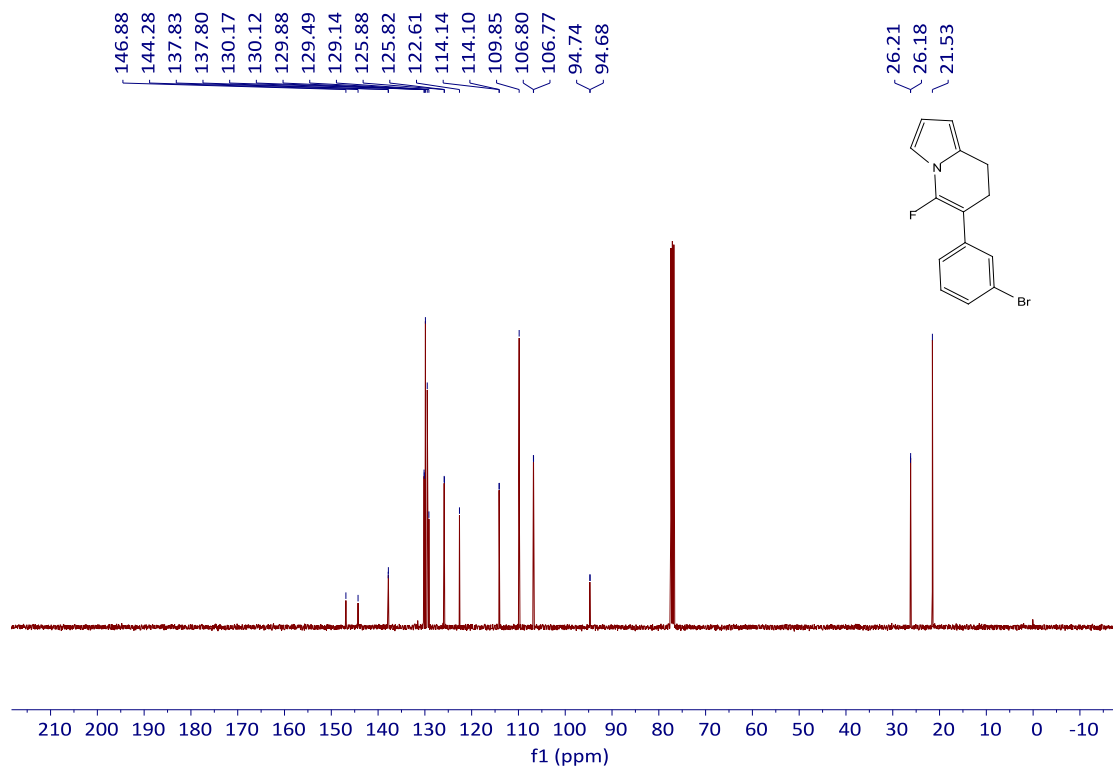

$^{13}\text{C}\{^1\text{H}\}$  NMR of **4j** (100 Hz,  $\text{CDCl}_3$ )



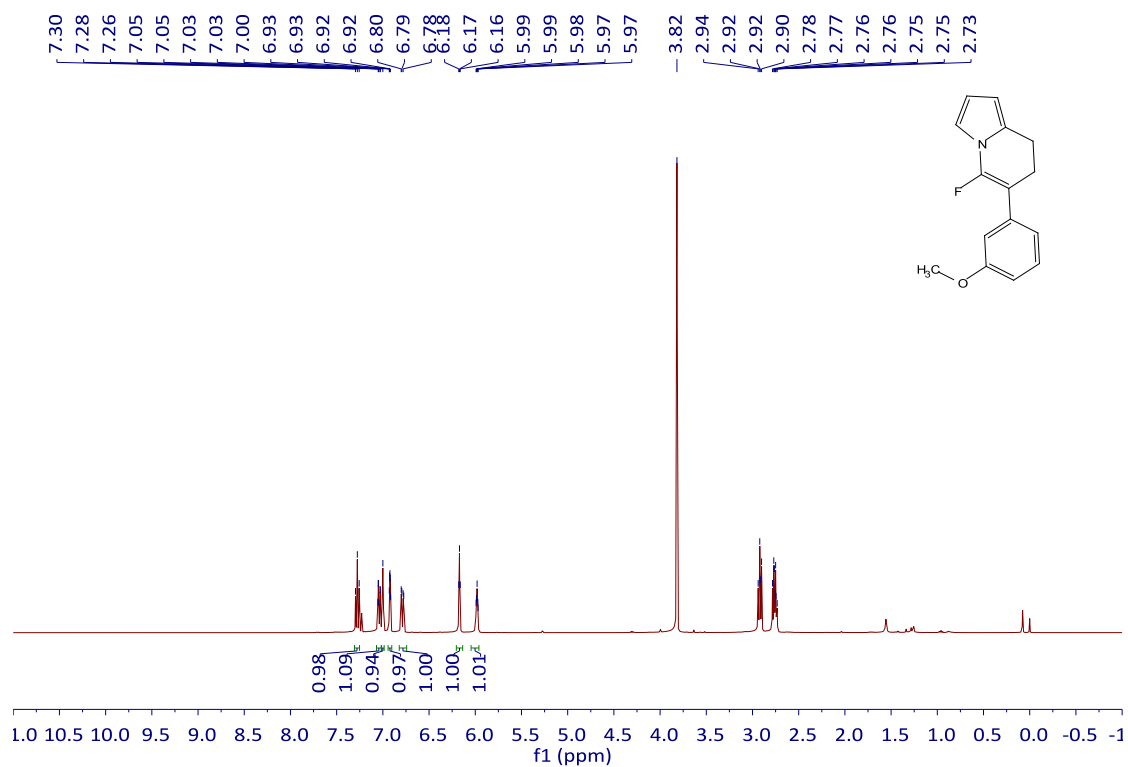

<sup>1</sup>H NMR of **4k** (400 Hz, CDCl<sub>3</sub>)

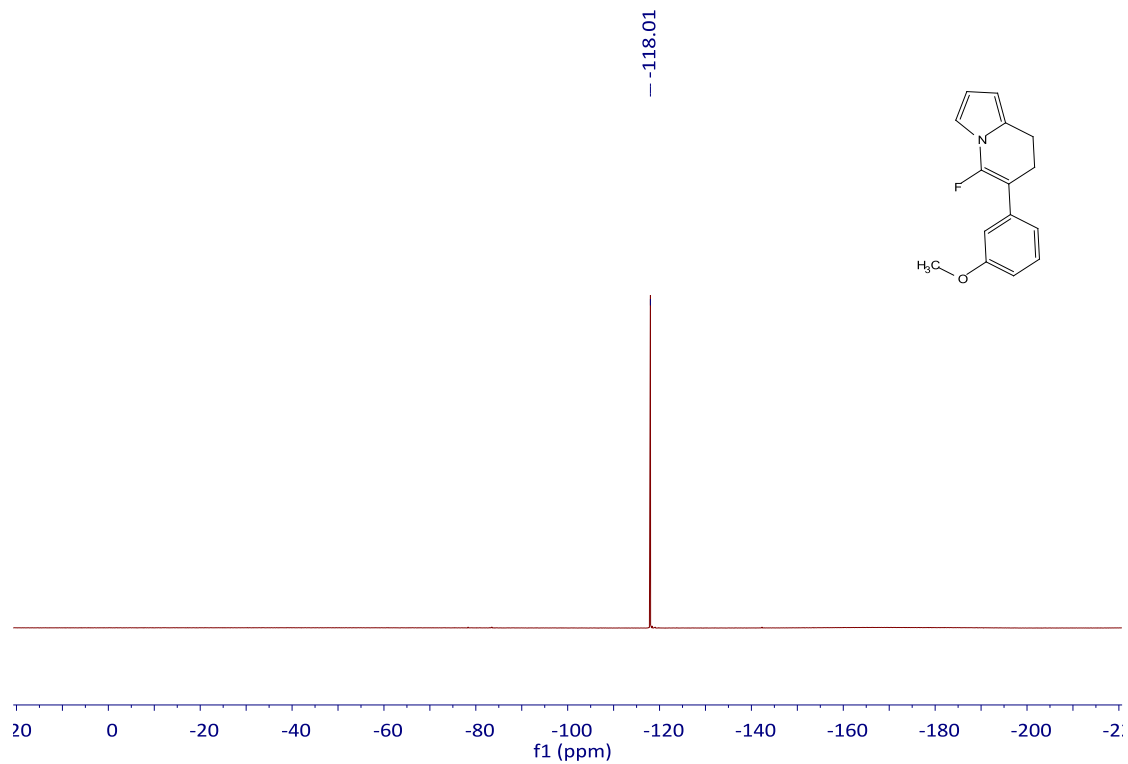

<sup>19</sup>F NMR of **4k** (376 Hz, CDCl<sub>3</sub>)

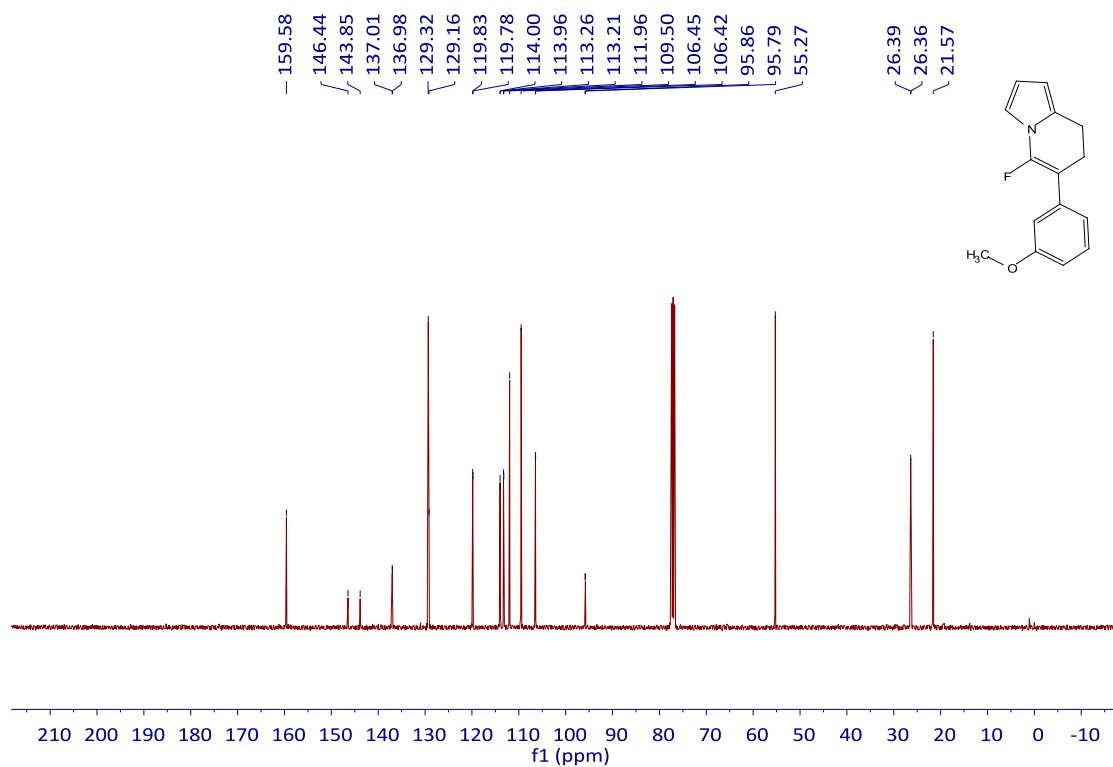

$^{13}\text{C}\{^1\text{H}\}$  NMR of **4k** (100 Hz,  $\text{CDCl}_3$ )

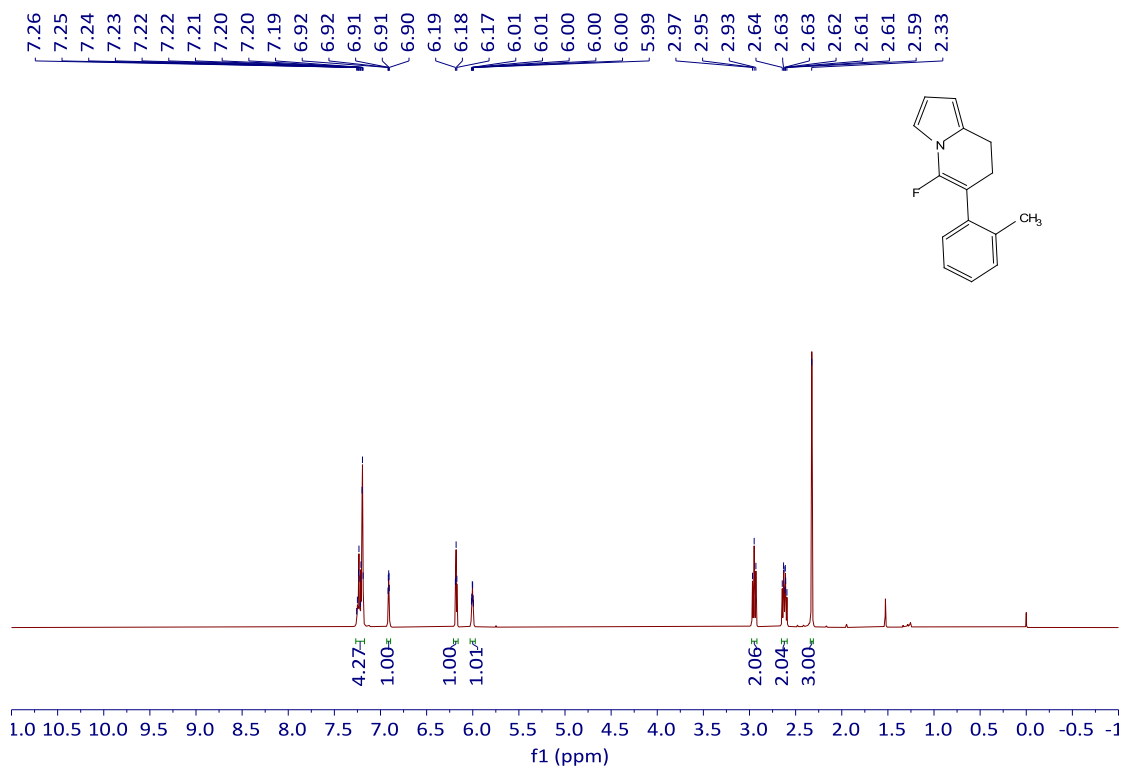

$^1\text{H}$  NMR of **4l** (400 Hz,  $\text{CDCl}_3$ )

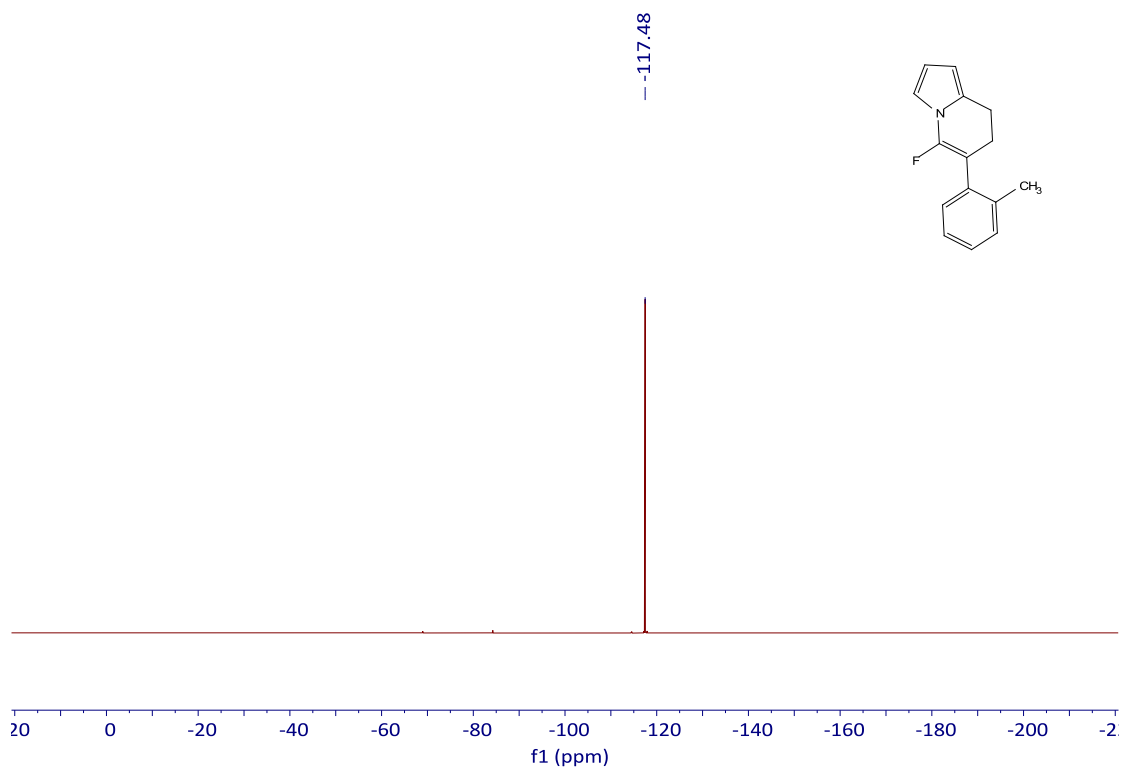

$^{19}\text{F}$  NMR of **4I** (376 Hz,  $\text{CDCl}_3$ )

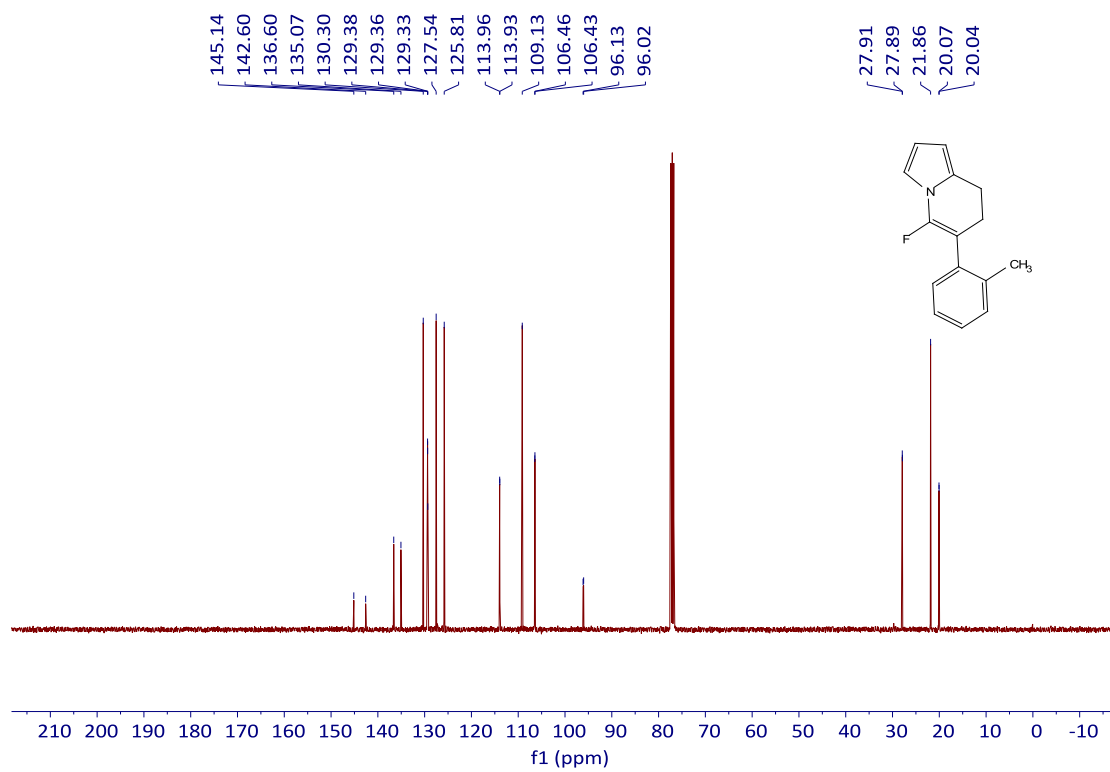

$^{13}\text{C}\{^1\text{H}\}$  NMR of **4I** (100 Hz,  $\text{CDCl}_3$ )

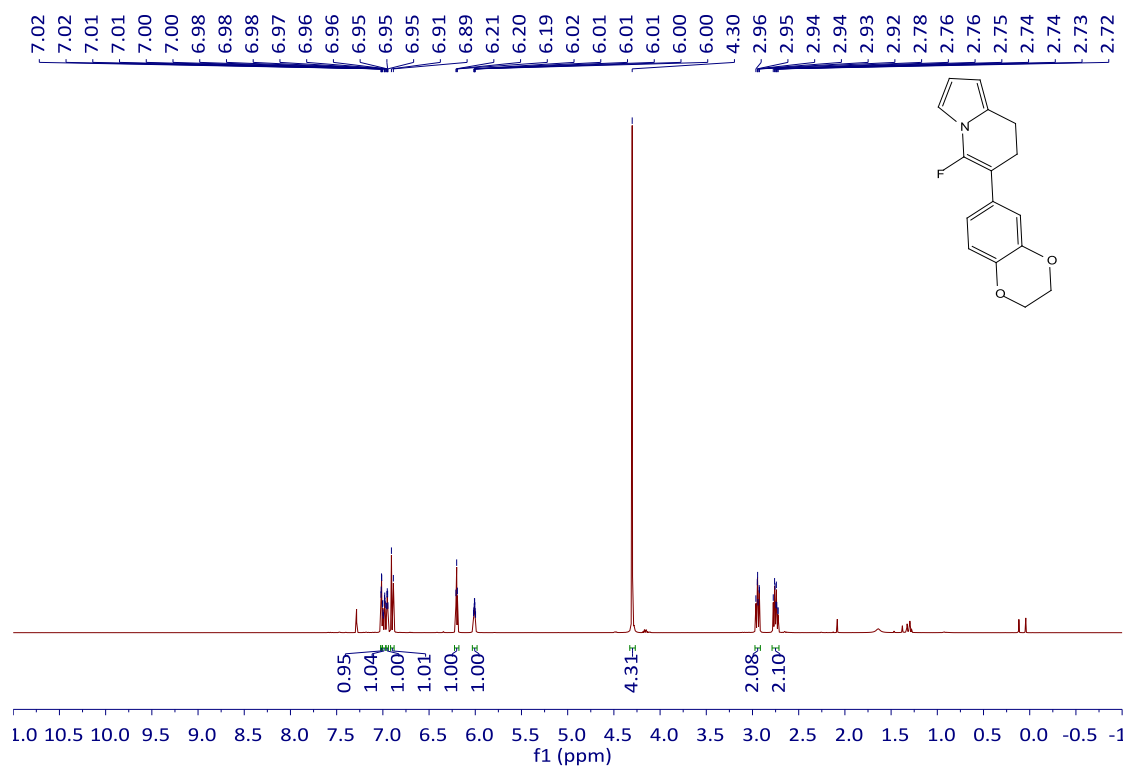

<sup>1</sup>H NMR of **4m** (400 Hz, CDCl<sub>3</sub>)

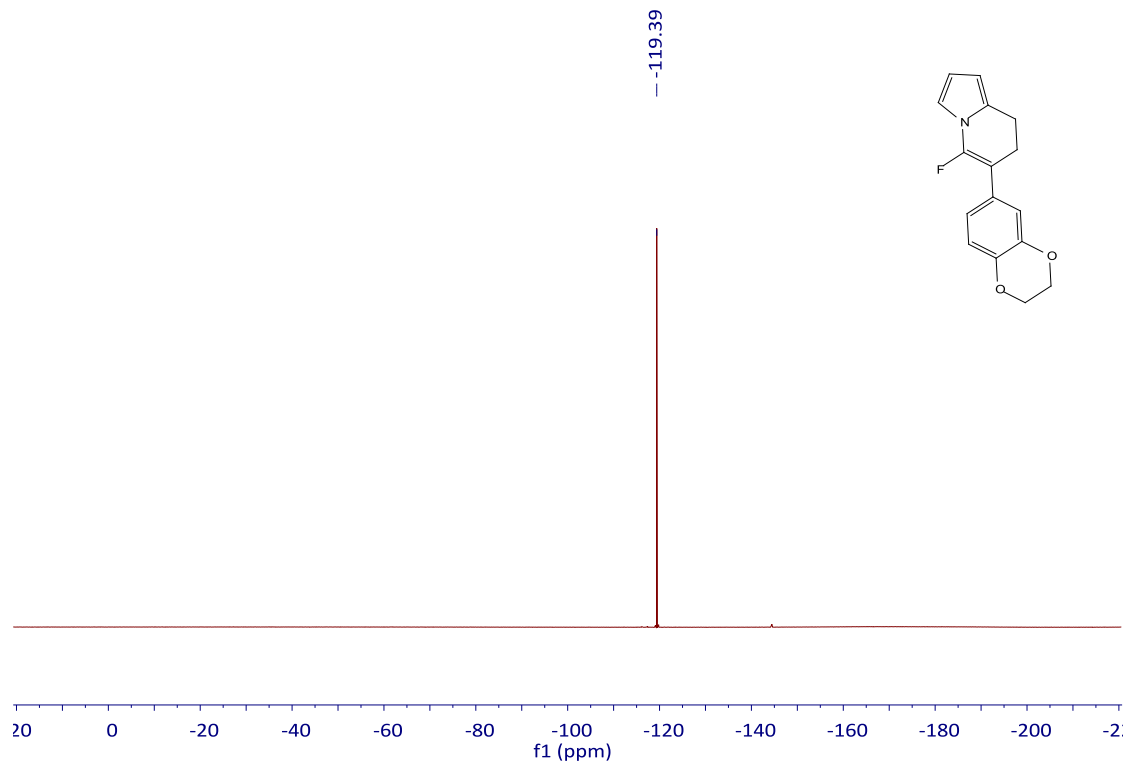

<sup>19</sup>F NMR of **4m** (376 Hz, CDCl<sub>3</sub>)

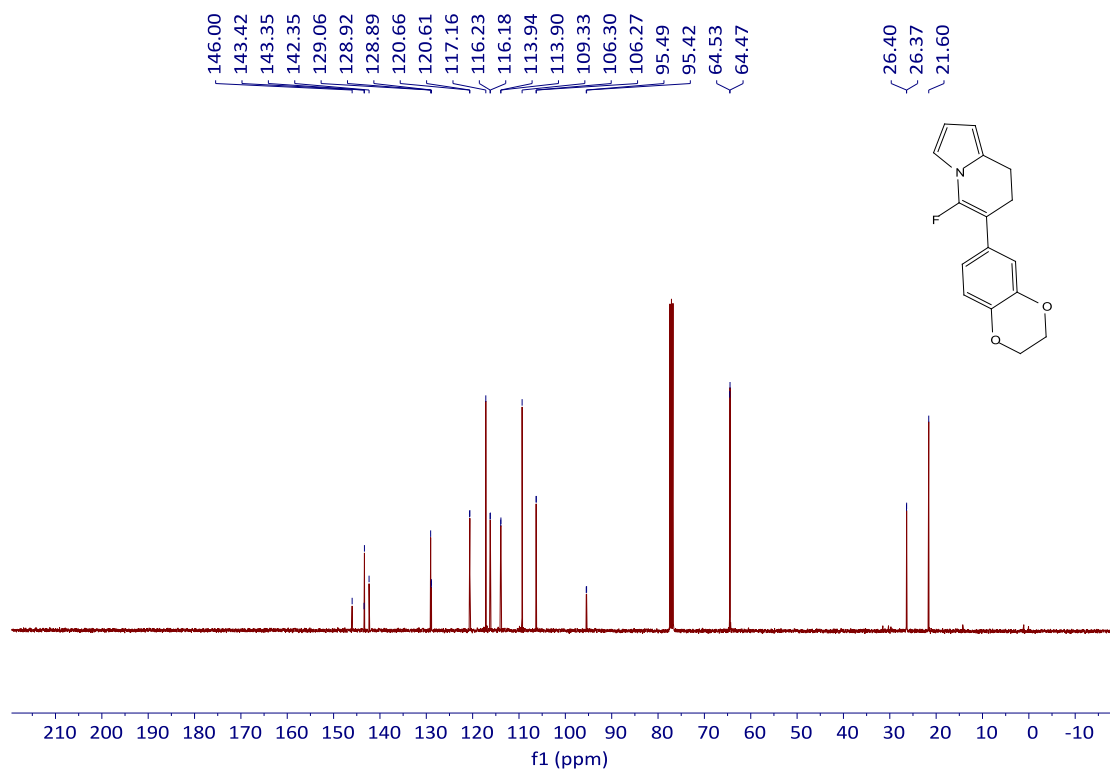

<sup>13</sup>C{<sup>1</sup>H} NMR of **4m** (100 Hz, CDCl<sub>3</sub>)

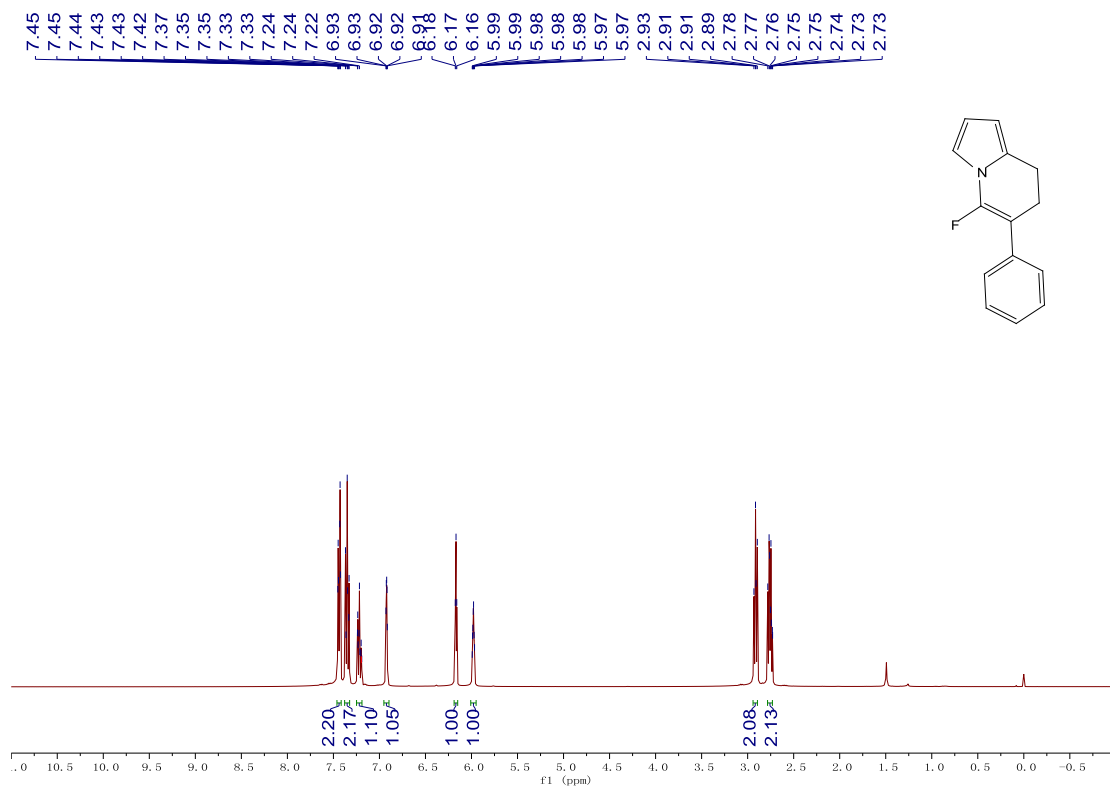

<sup>1</sup>H NMR of **4n** (400 Hz, CDCl<sub>3</sub>)

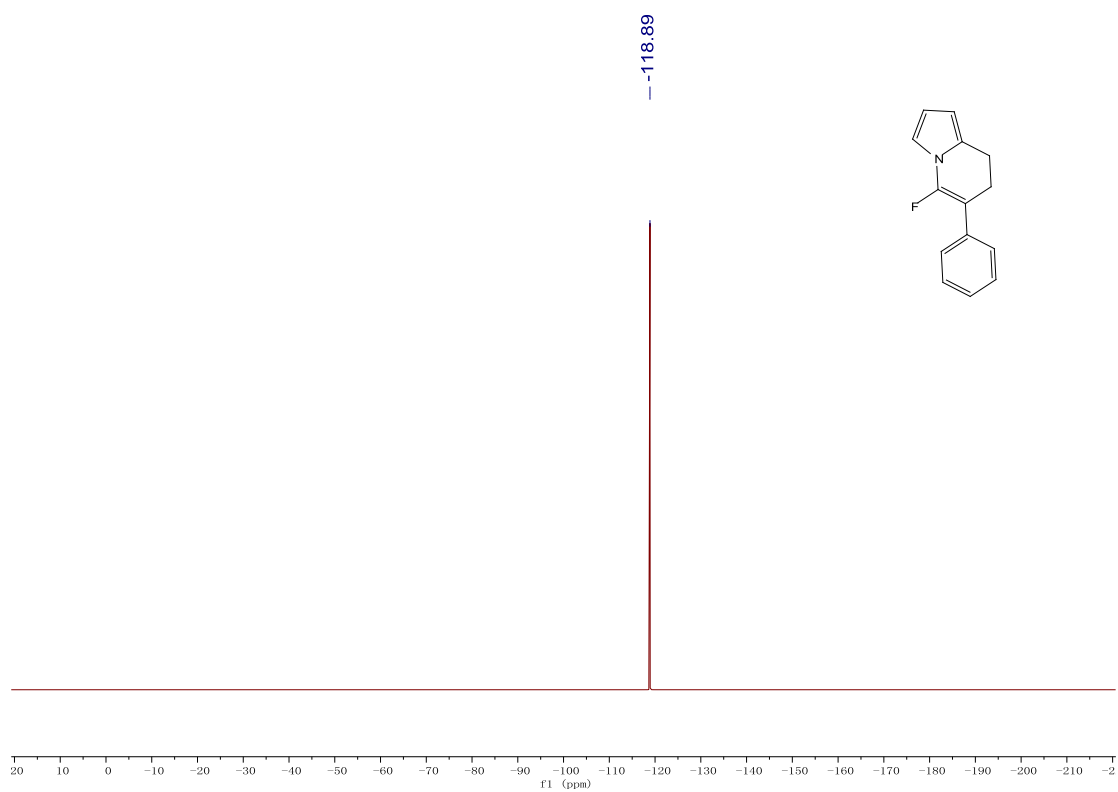

$^{19}\text{F}$  NMR of **4n** (376 Hz,  $\text{CDCl}_3$ )

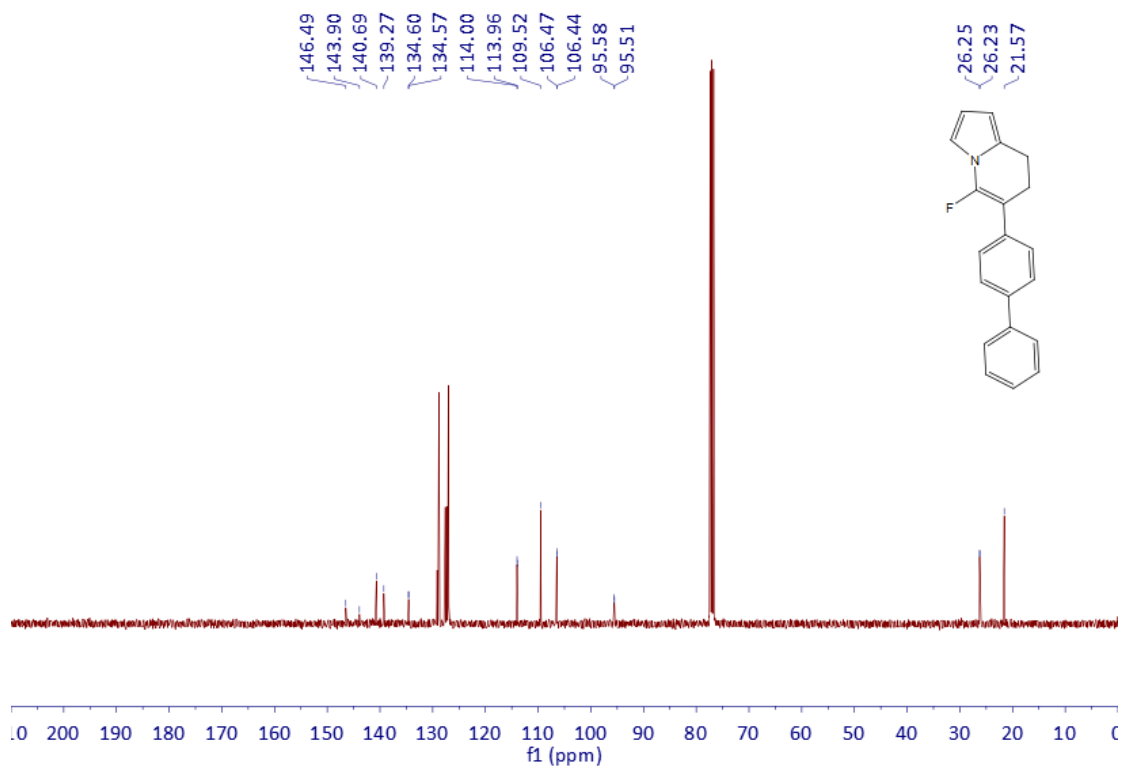

$^{13}\text{C}\{^1\text{H}\}$  NMR of **4n** (100 Hz,  $\text{CDCl}_3$ )

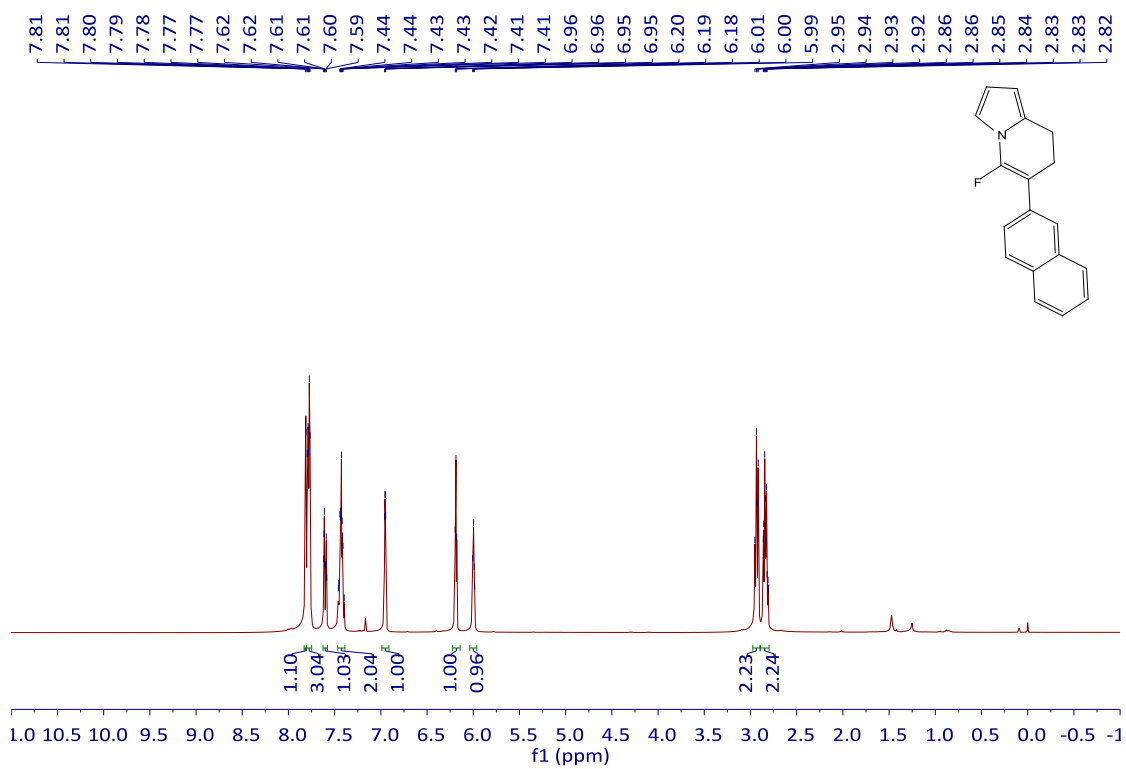

<sup>1</sup>H NMR of **4o** (400 Hz, CDCl<sub>3</sub>)

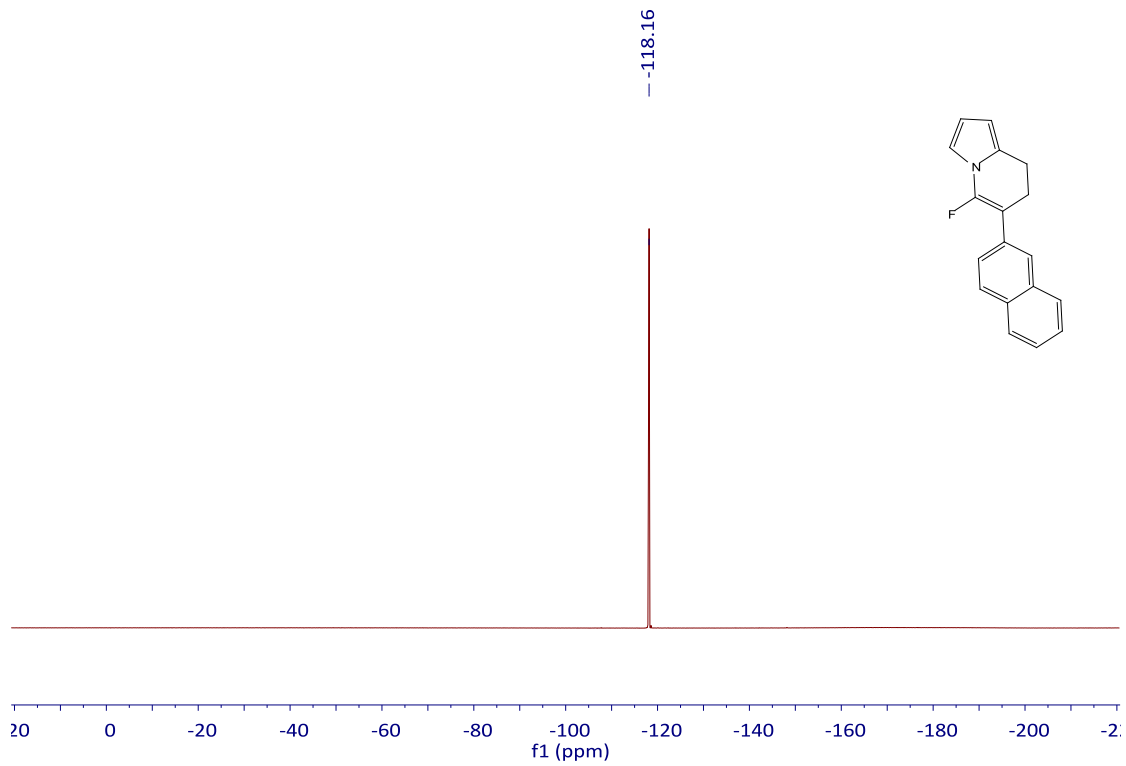

<sup>19</sup>F NMR of **4o** (376 Hz, CDCl<sub>3</sub>)

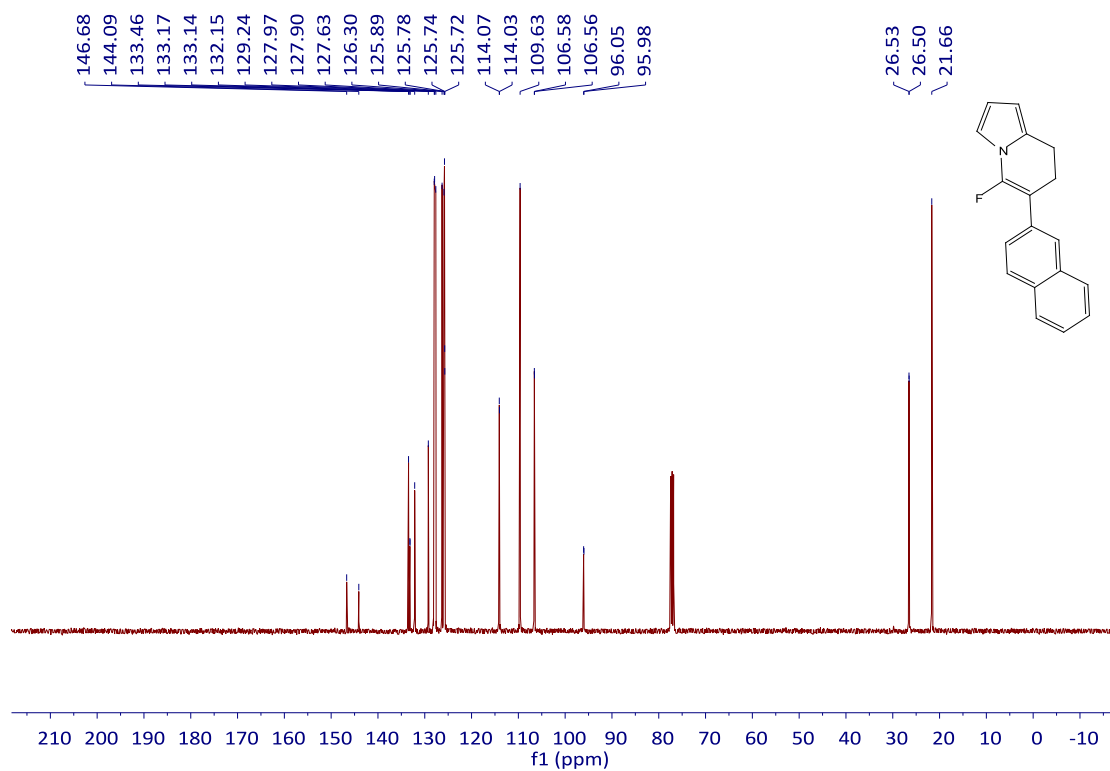

$^{13}\text{C}\{^1\text{H}\}$  NMR of **4o** (100 Hz,  $\text{CDCl}_3$ )

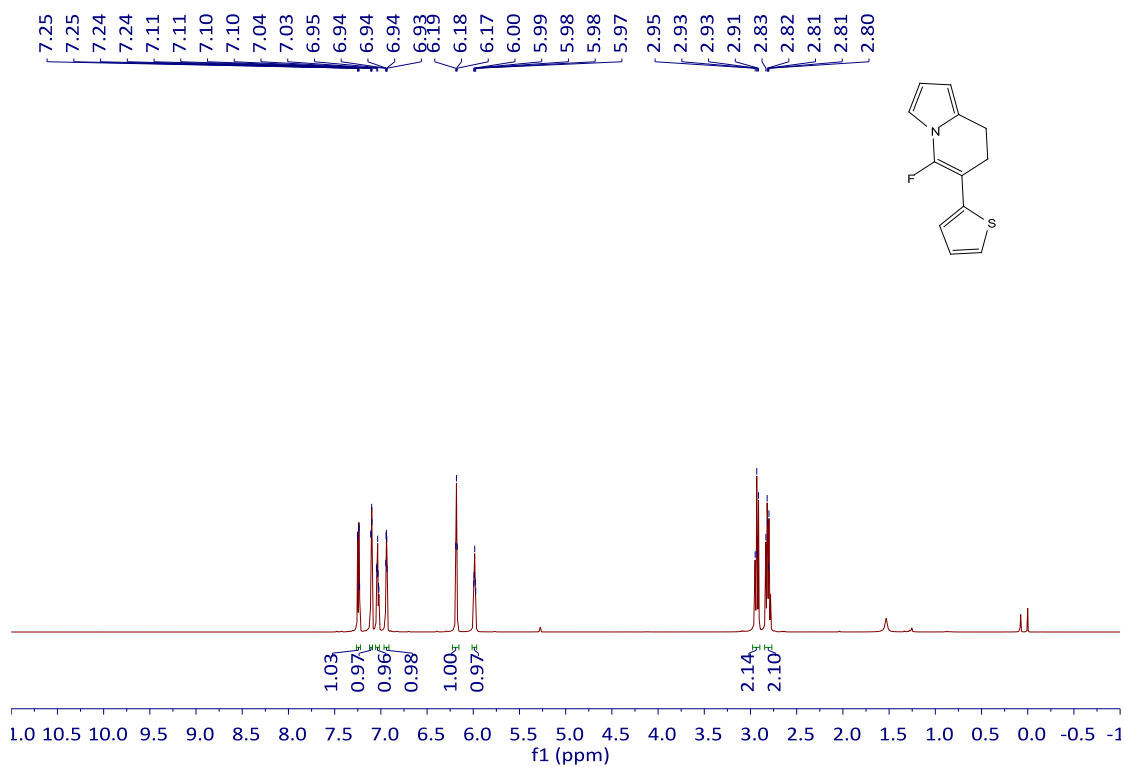

$^1\text{H}$  NMR of **4p** (400 Hz,  $\text{CDCl}_3$ )



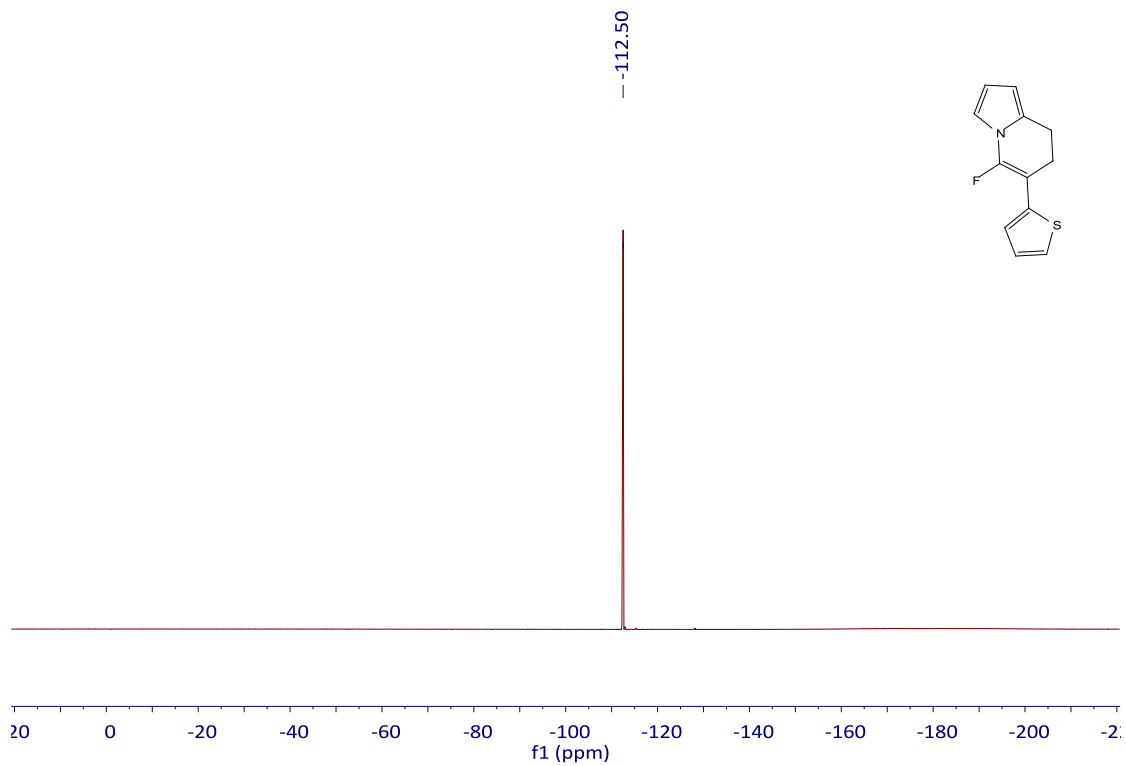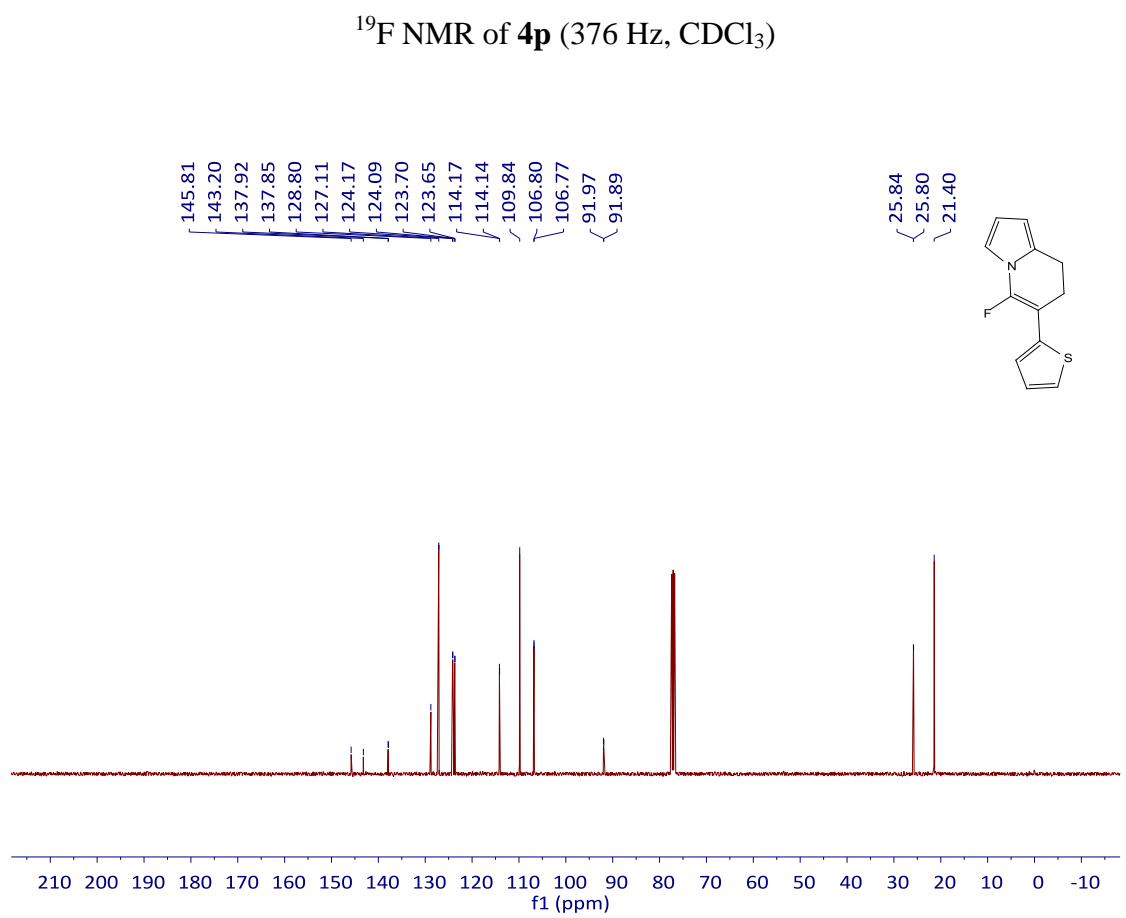

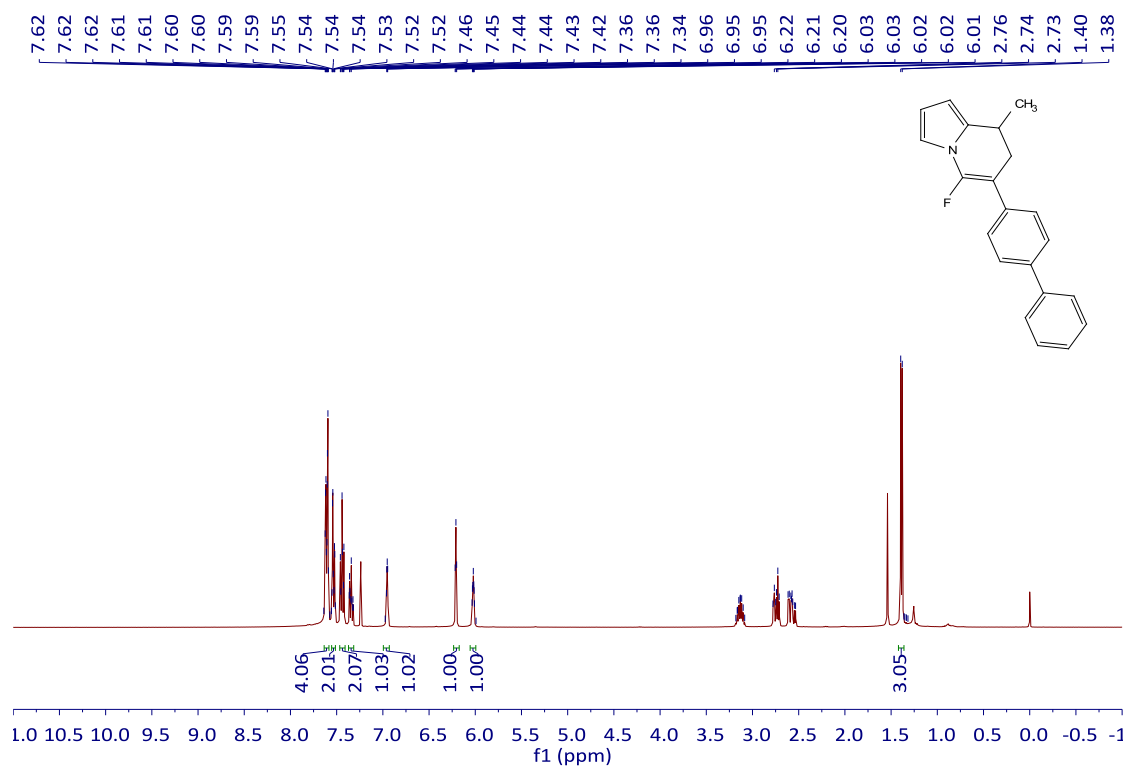

<sup>1</sup>H NMR of **4q** (400 Hz, CDCl<sub>3</sub>)

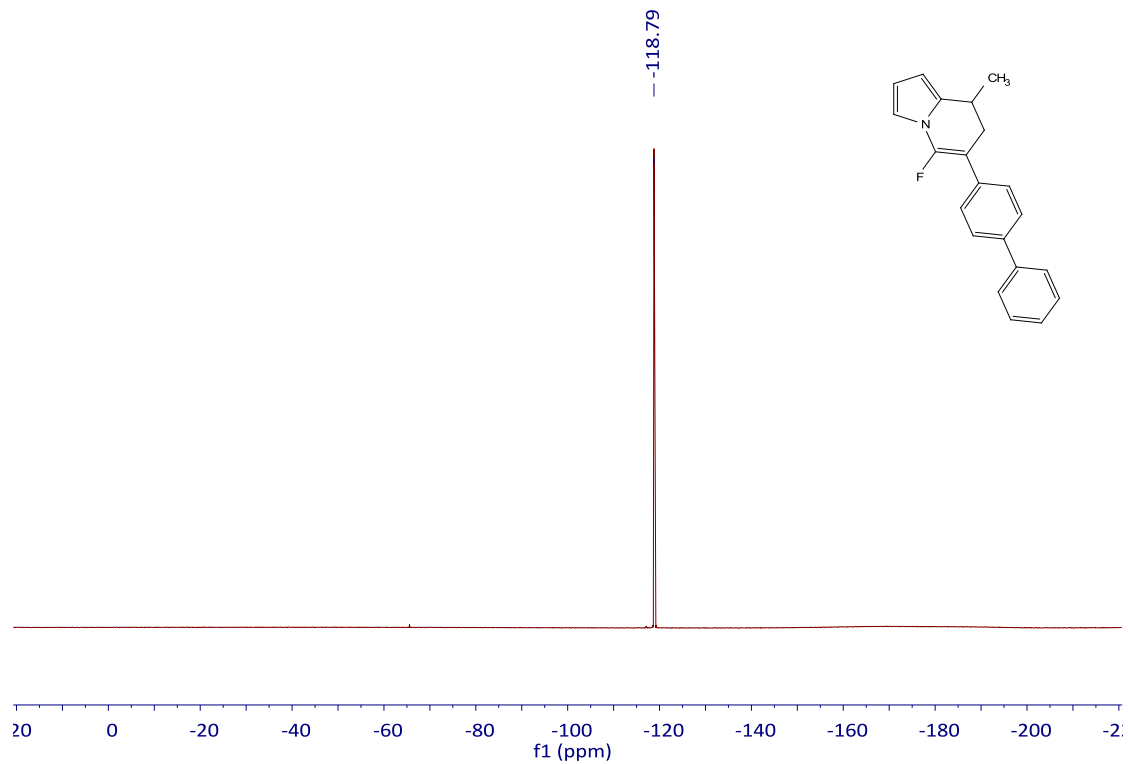

<sup>19</sup>F NMR of **4q** (376 Hz, CDCl<sub>3</sub>)

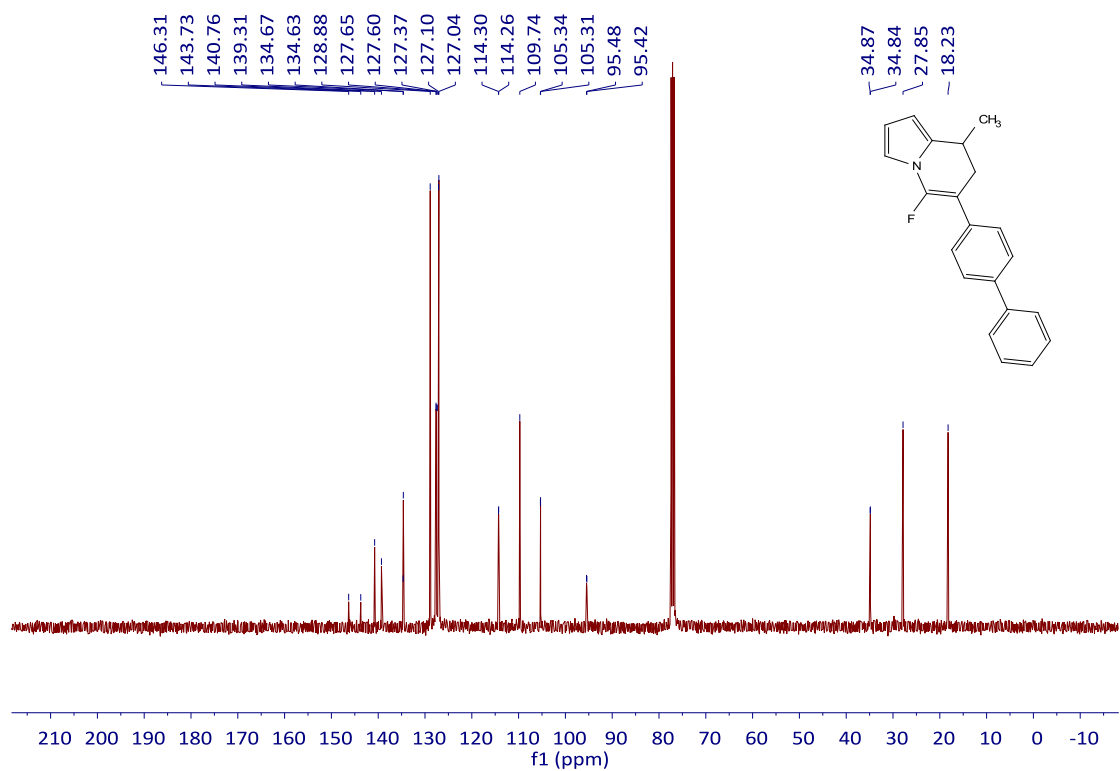

<sup>13</sup>C{<sup>1</sup>H} NMR of **4q** (100 Hz, CDCl<sub>3</sub>)

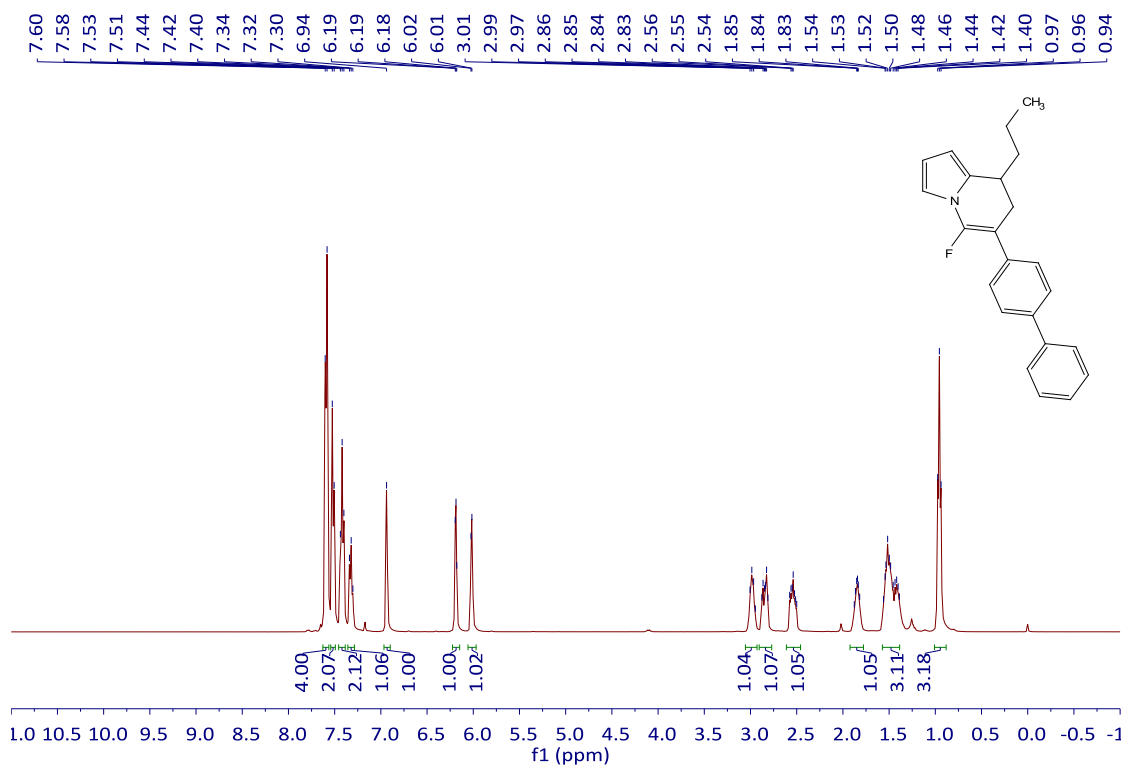

<sup>1</sup>H NMR of **4r** (400 Hz, CDCl<sub>3</sub>)

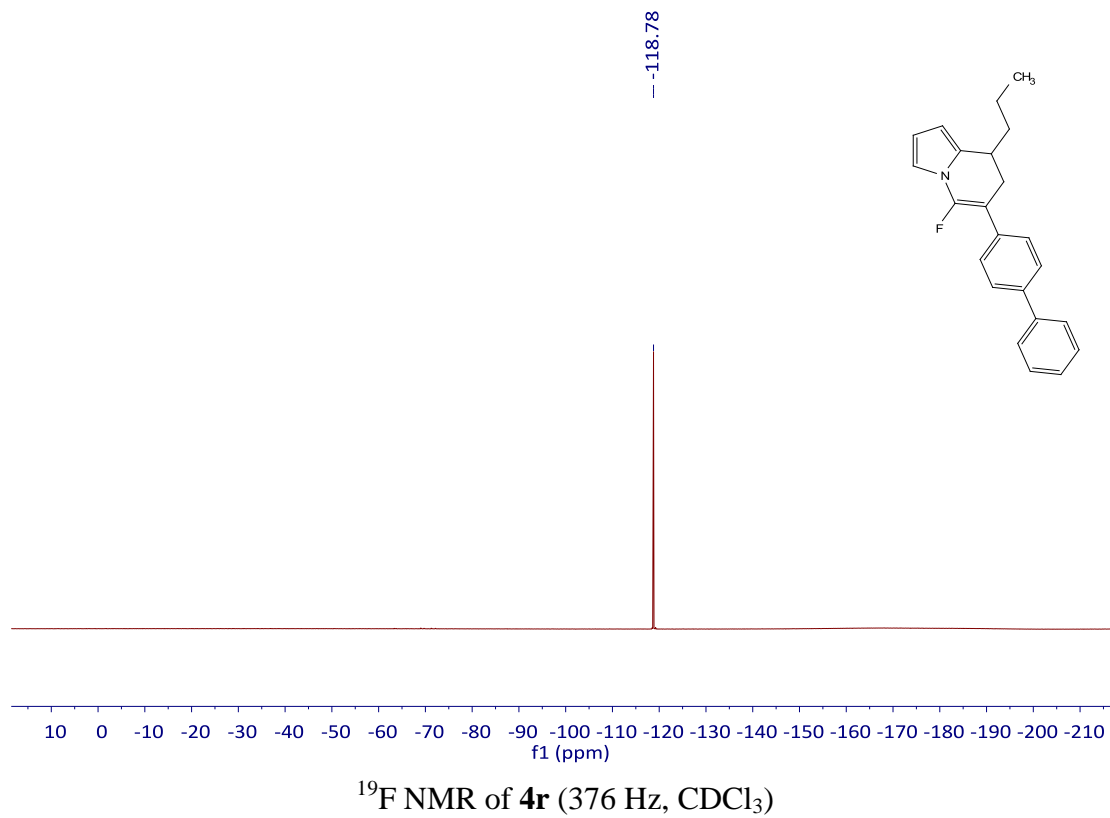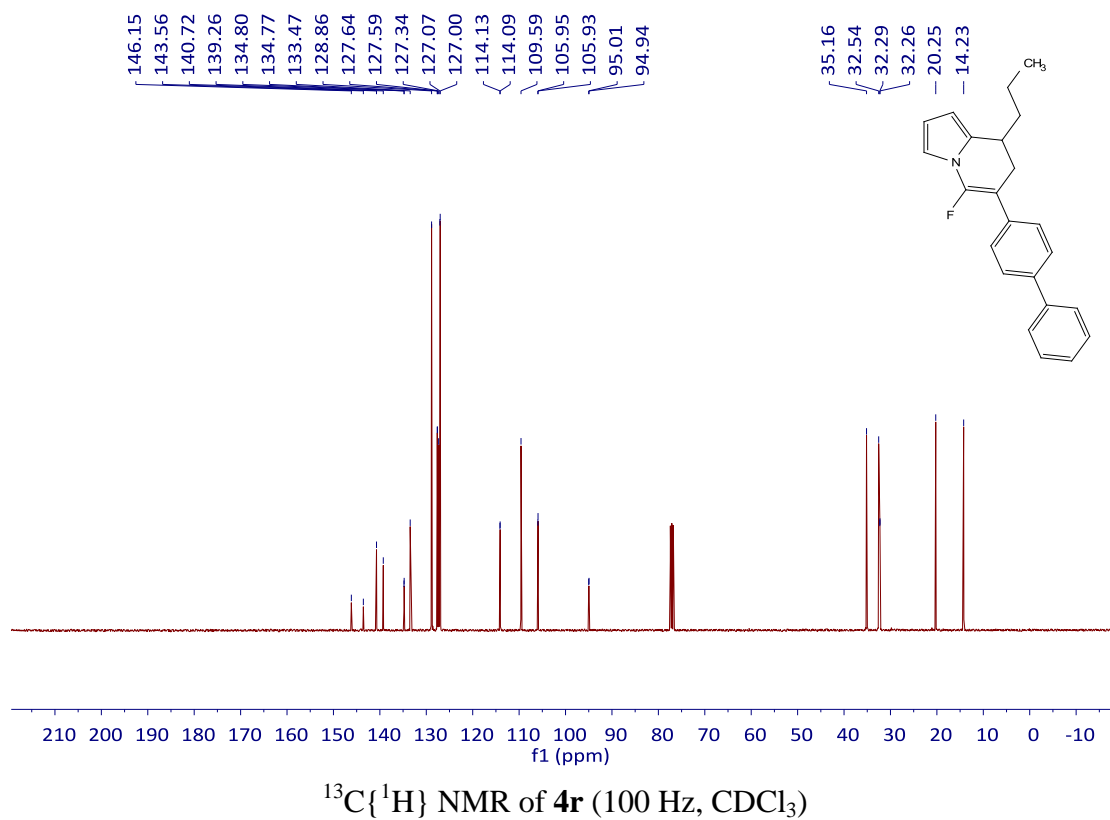

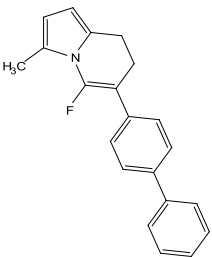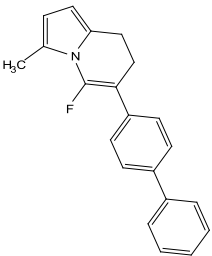

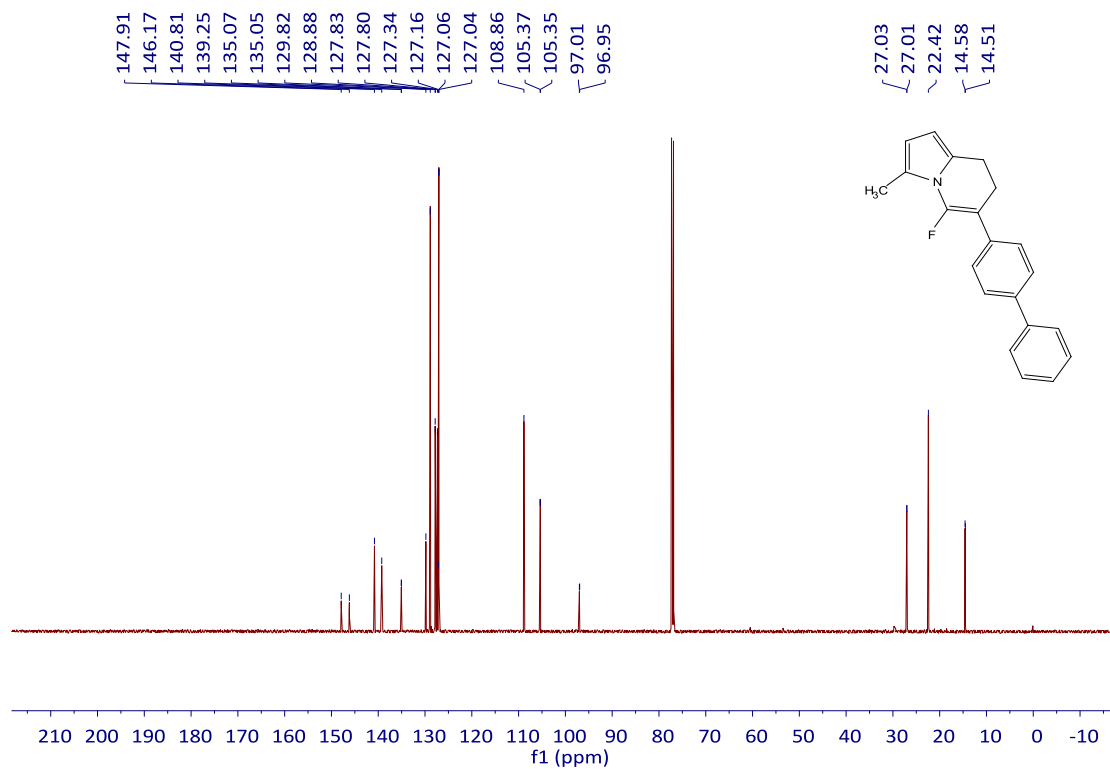

<sup>13</sup>C{<sup>1</sup>H} NMR of **4s** (100 Hz, CDCl<sub>3</sub>)

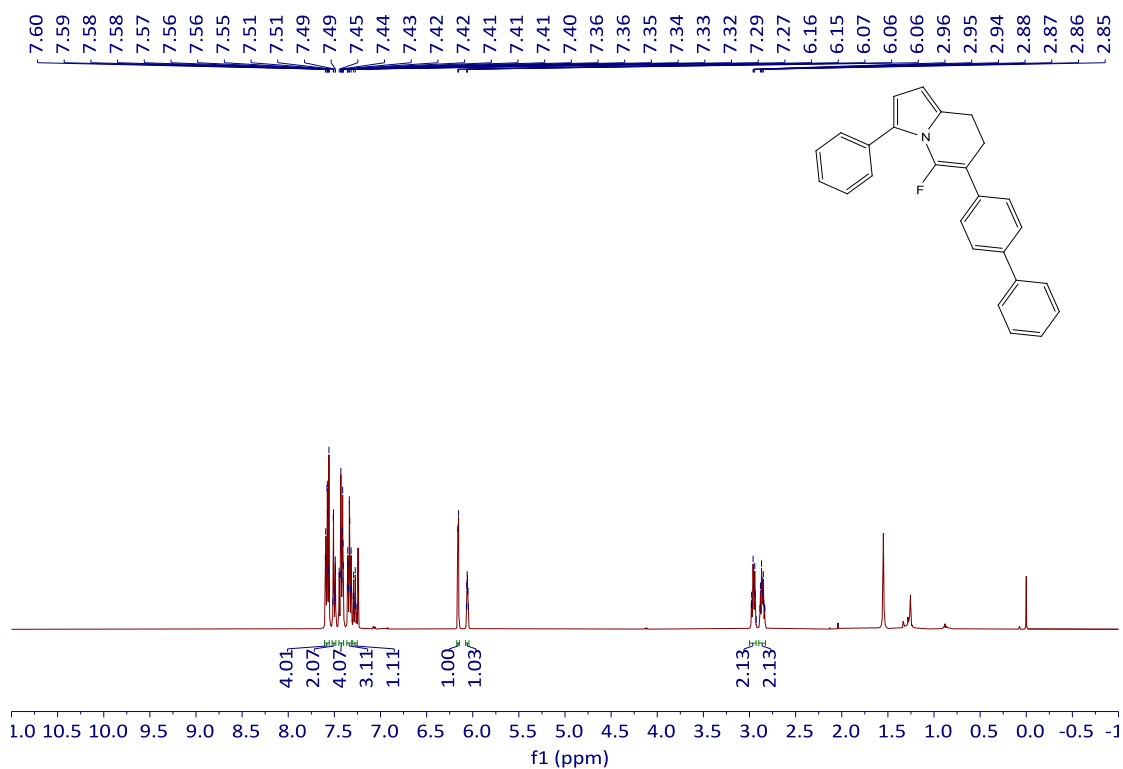

<sup>1</sup>H NMR of **4t** (400 Hz, CDCl<sub>3</sub>)

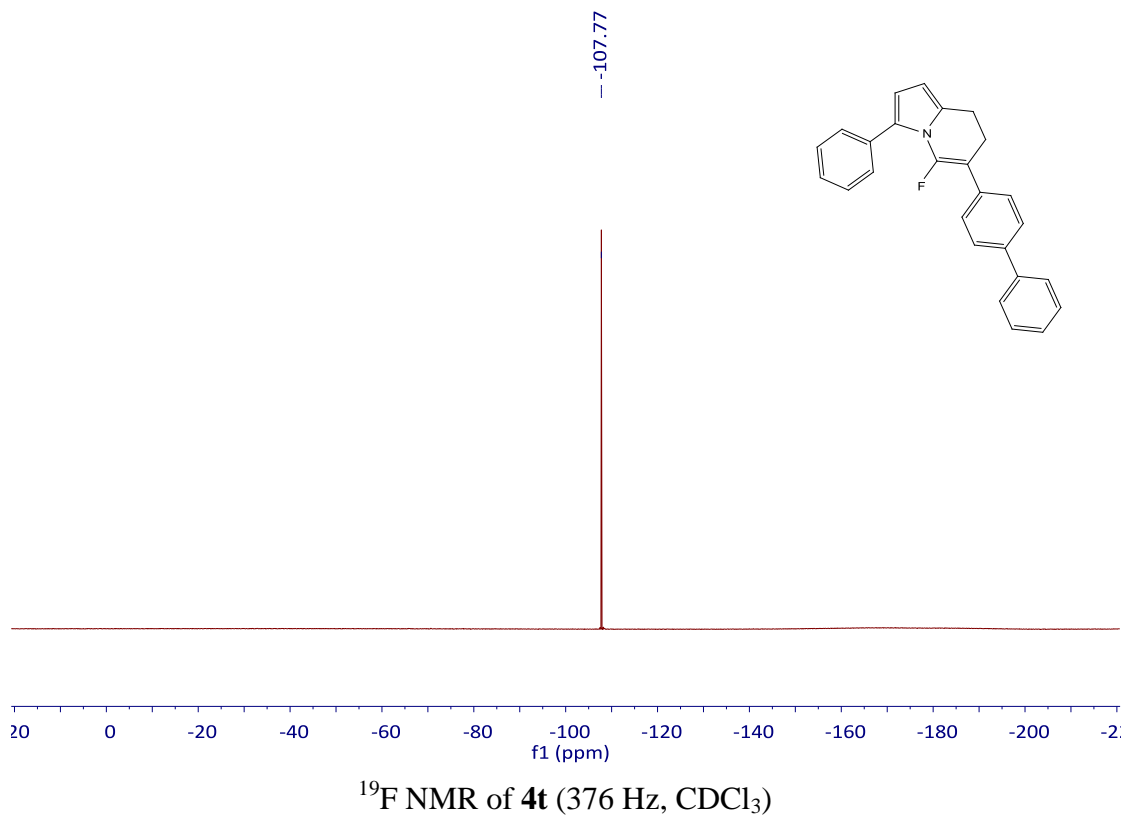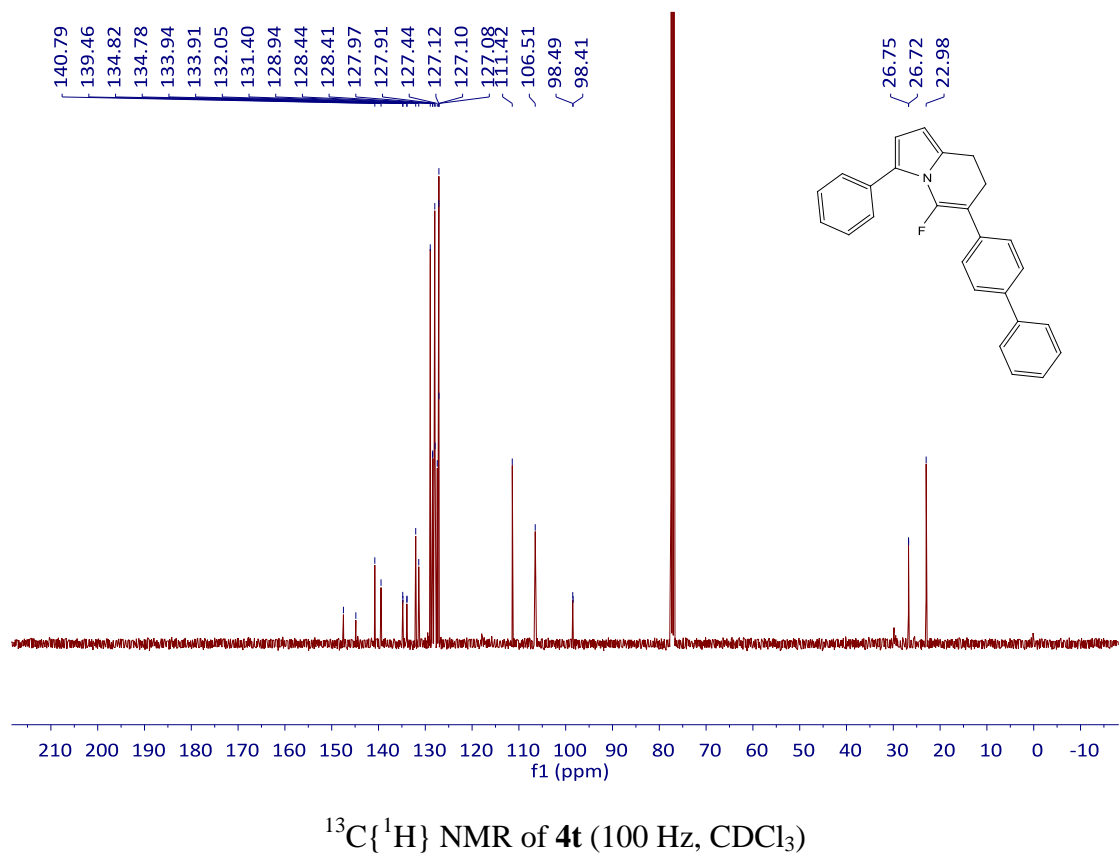

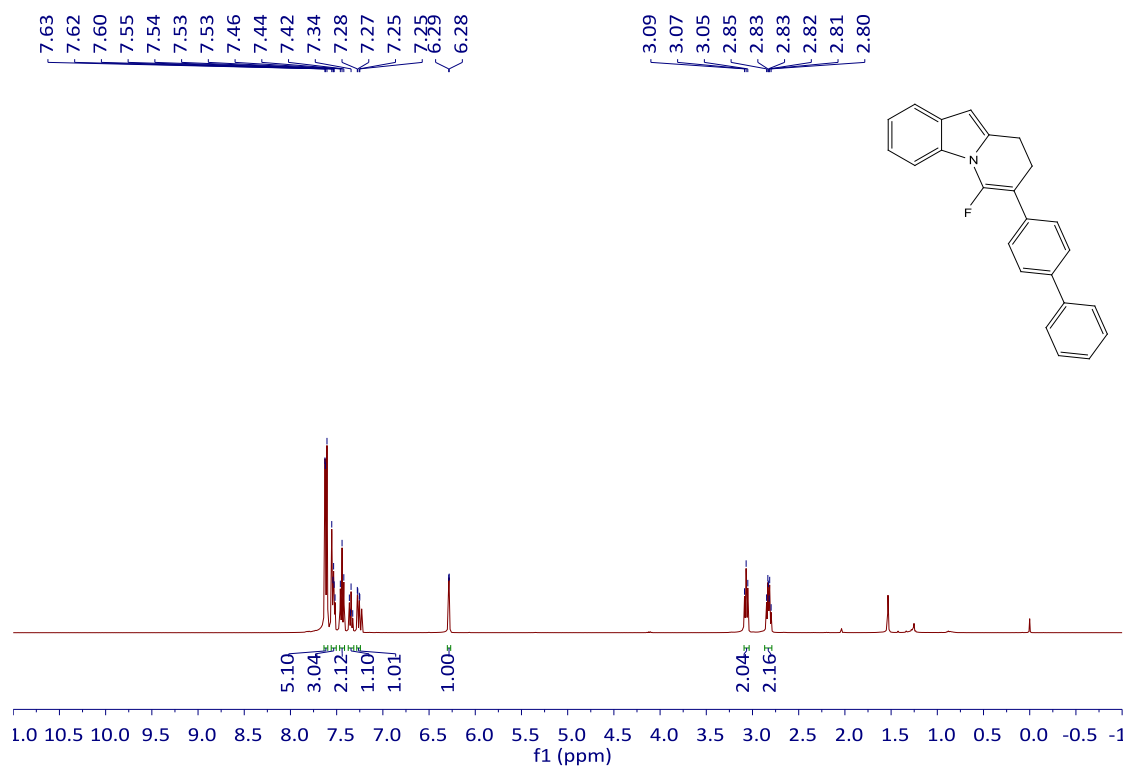

<sup>1</sup>H NMR of **4u** (400 Hz, CDCl<sub>3</sub>)

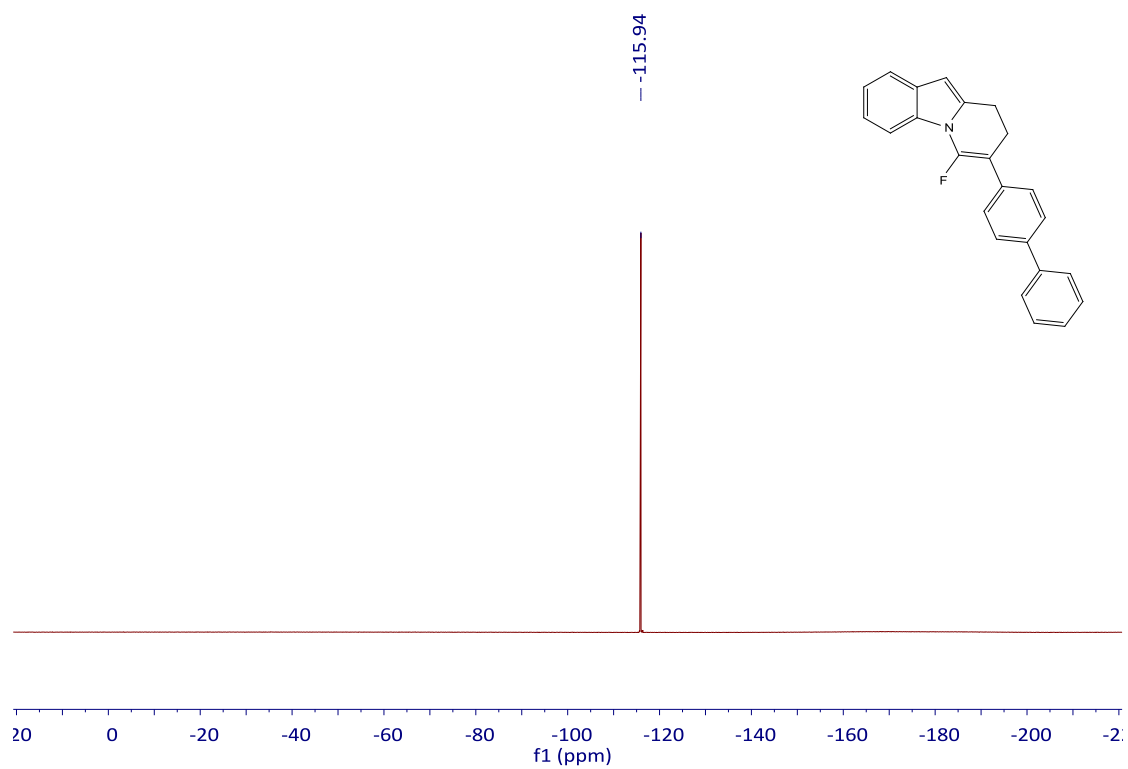

<sup>19</sup>F NMR of **4u** (376 Hz, CDCl<sub>3</sub>)



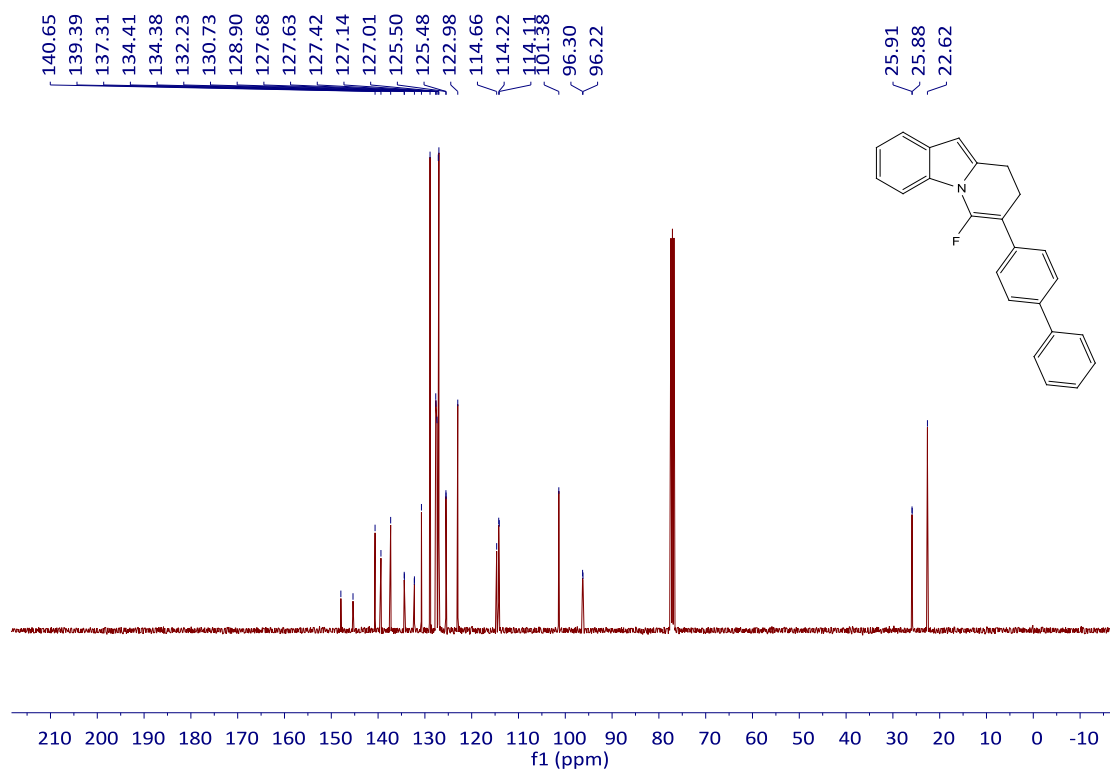

<sup>13</sup>C{<sup>1</sup>H} NMR of **4u** (100 Hz, CDCl<sub>3</sub>)

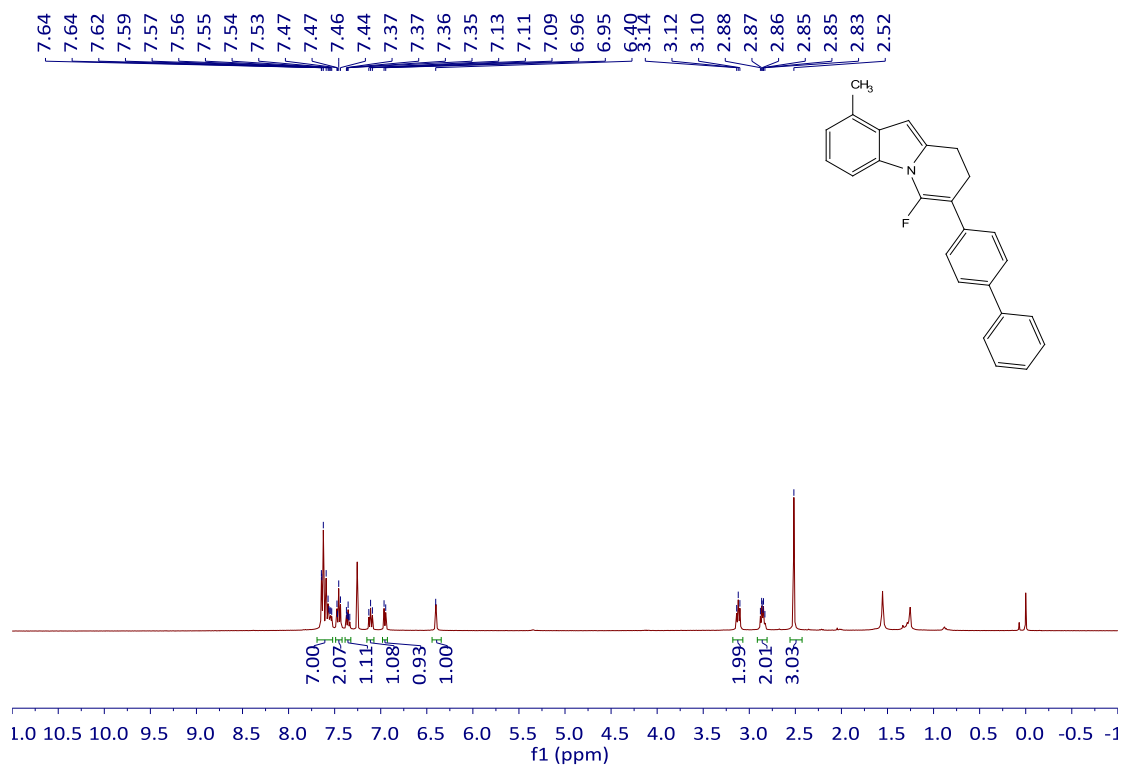

<sup>1</sup>H NMR of **4v** (400 Hz, CDCl<sub>3</sub>)

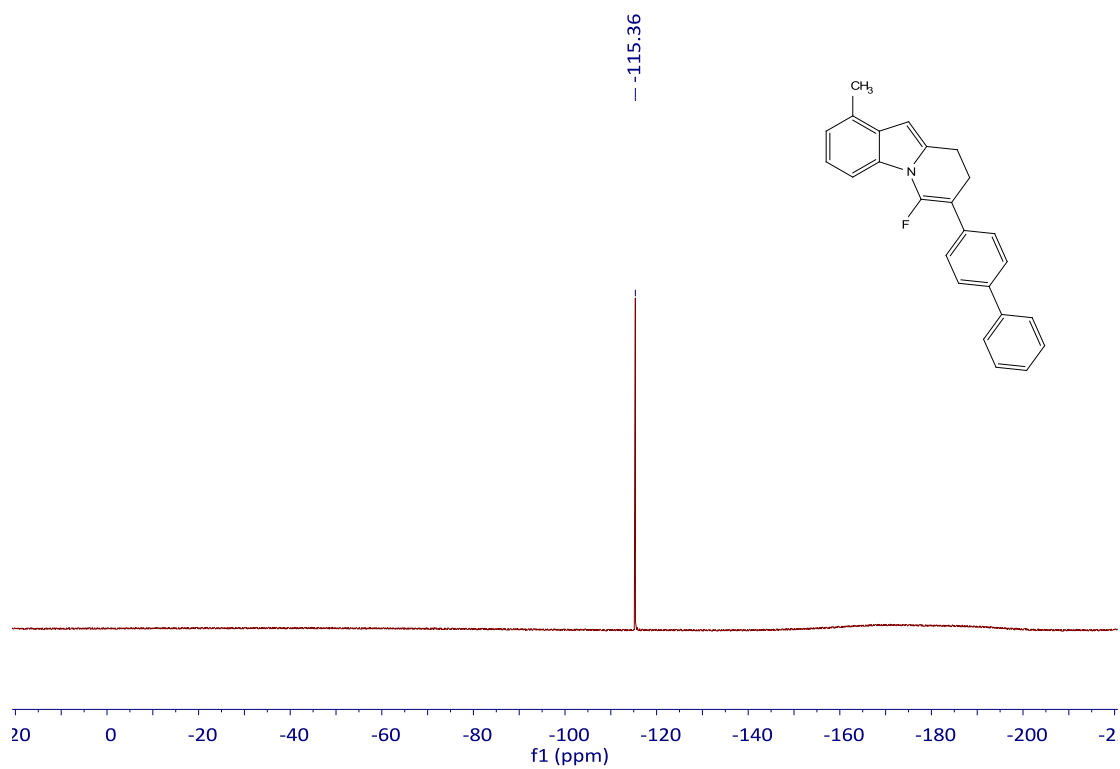

$^{19}\text{F}$  NMR of **4v** (376 Hz,  $\text{CDCl}_3$ )

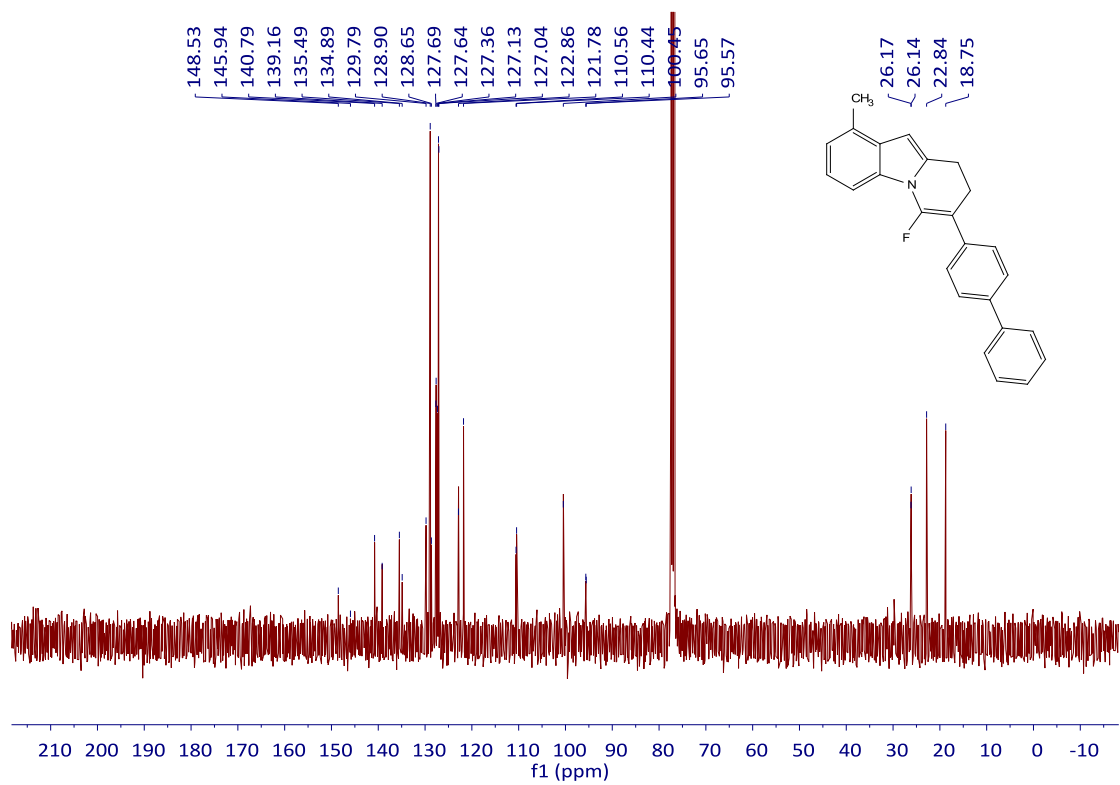

$^{13}\text{C}\{^1\text{H}\}$  NMR of **4v** (100 Hz,  $\text{CDCl}_3$ )

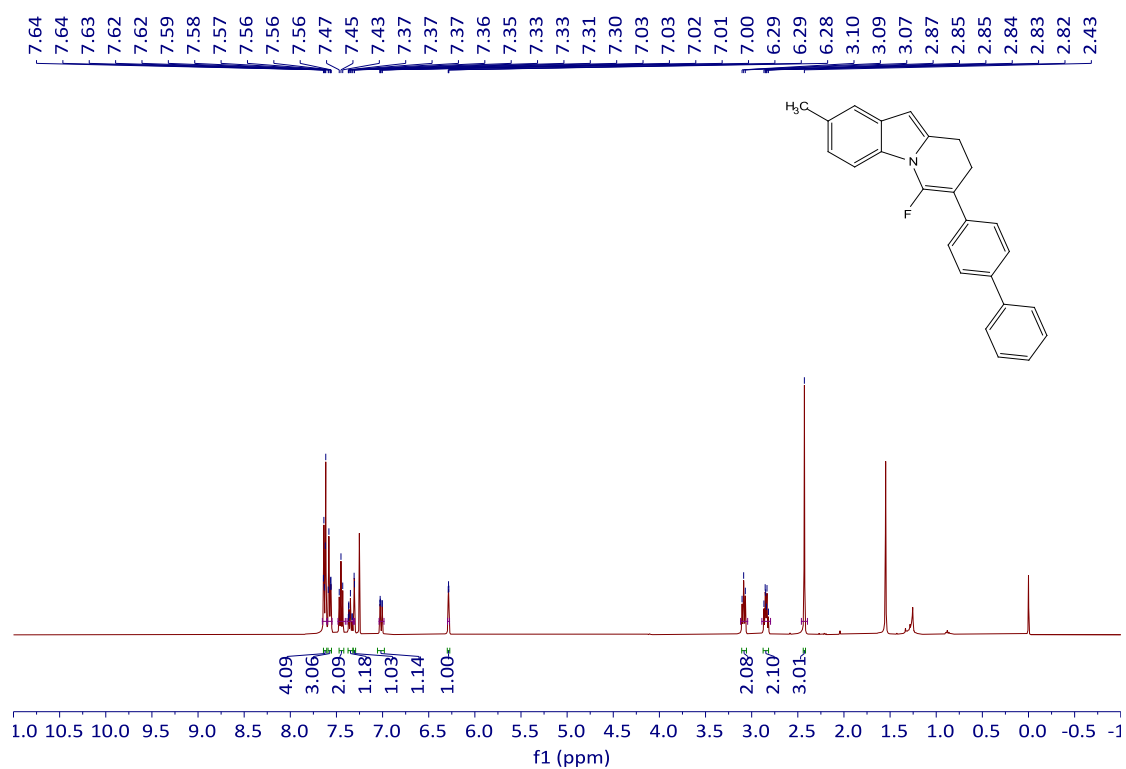

<sup>1</sup>H NMR of **4w** (400 Hz, CDCl<sub>3</sub>)

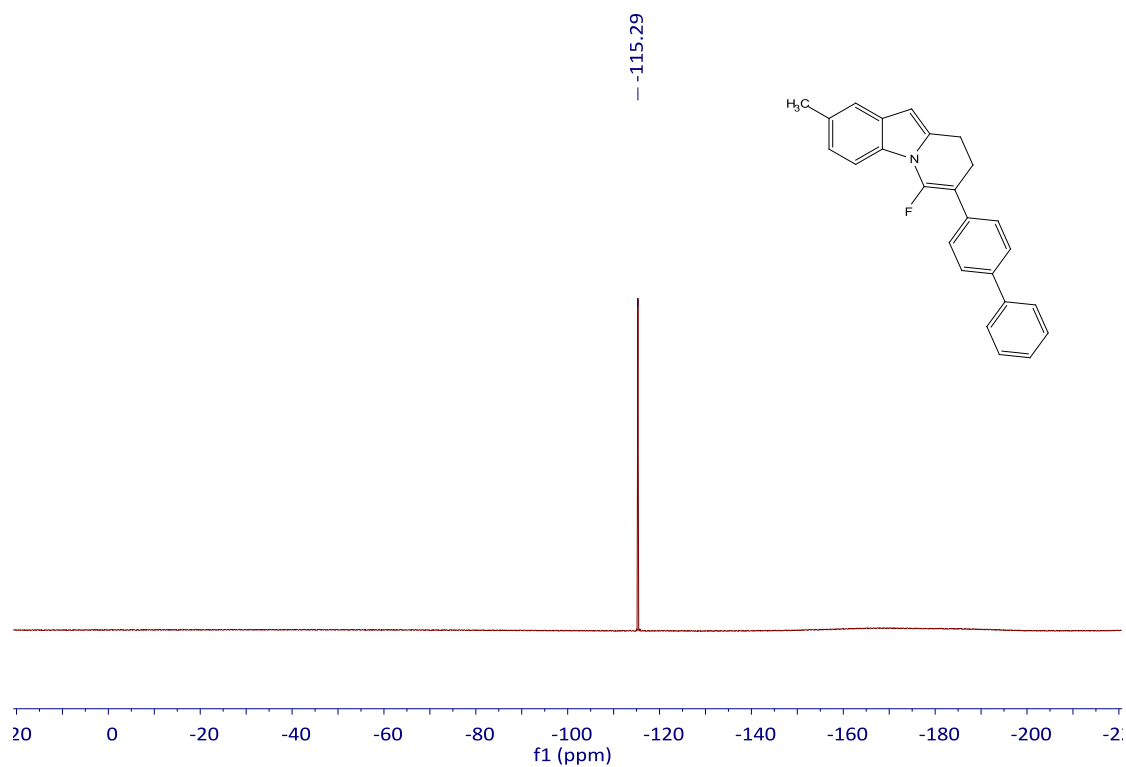

<sup>19</sup>F NMR of **4w** (376 Hz, CDCl<sub>3</sub>)

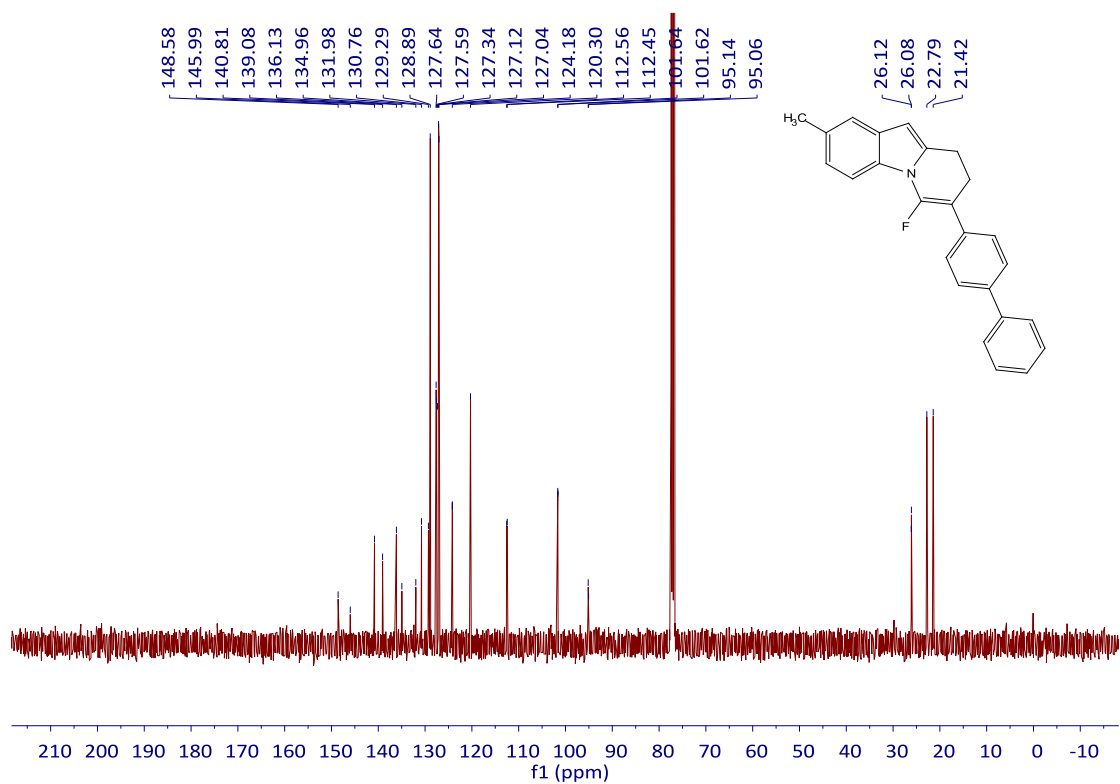

<sup>13</sup>C{<sup>1</sup>H} NMR of **4w** (100 Hz, CDCl<sub>3</sub>)

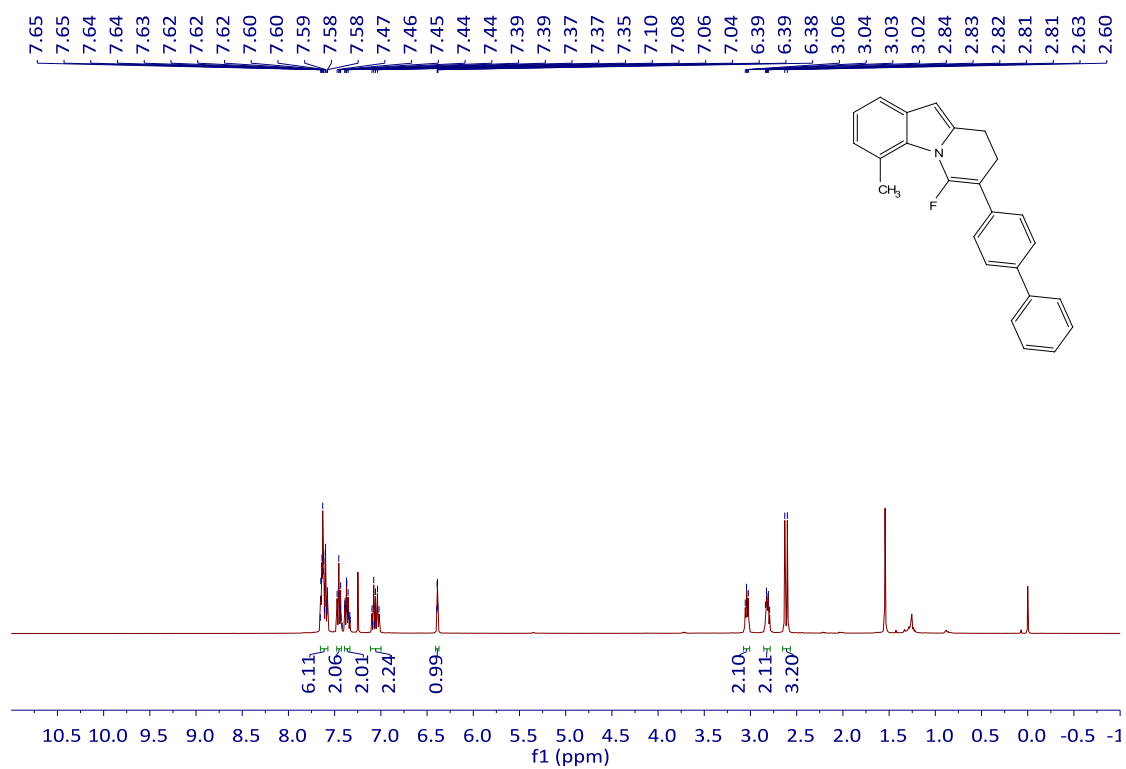

<sup>1</sup>H NMR of **4x** (400 Hz, CDCl<sub>3</sub>)

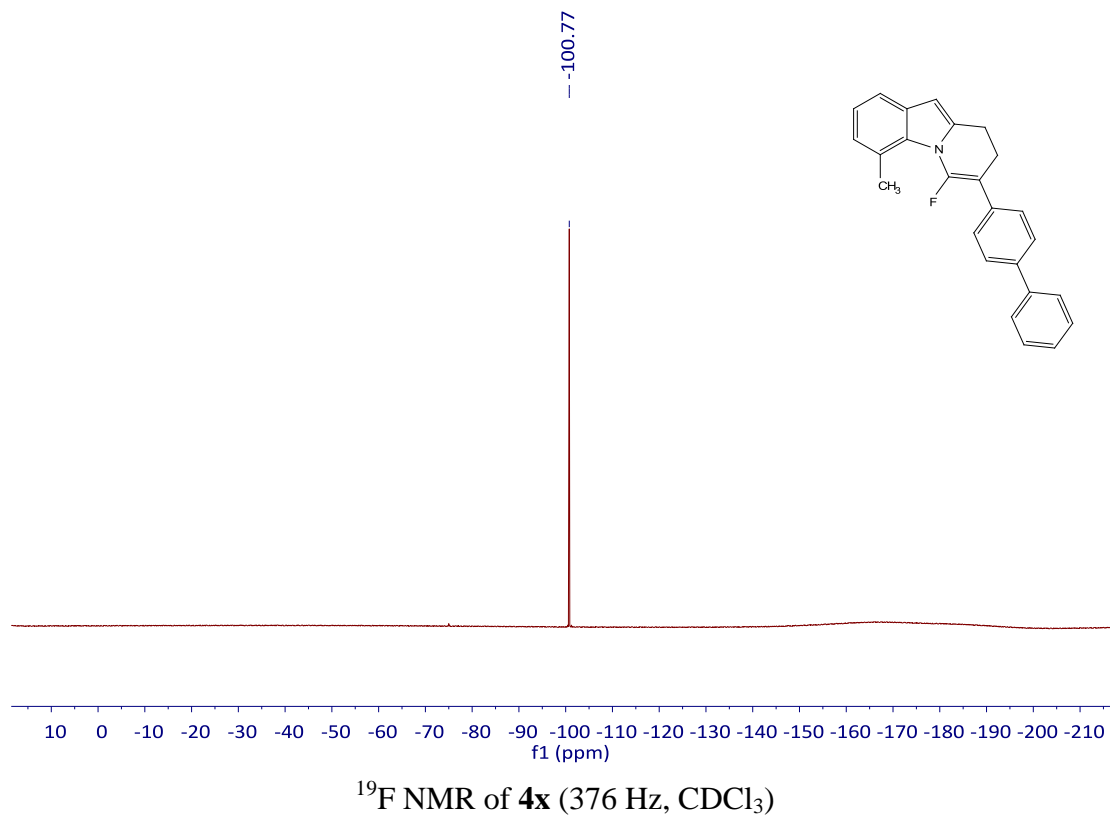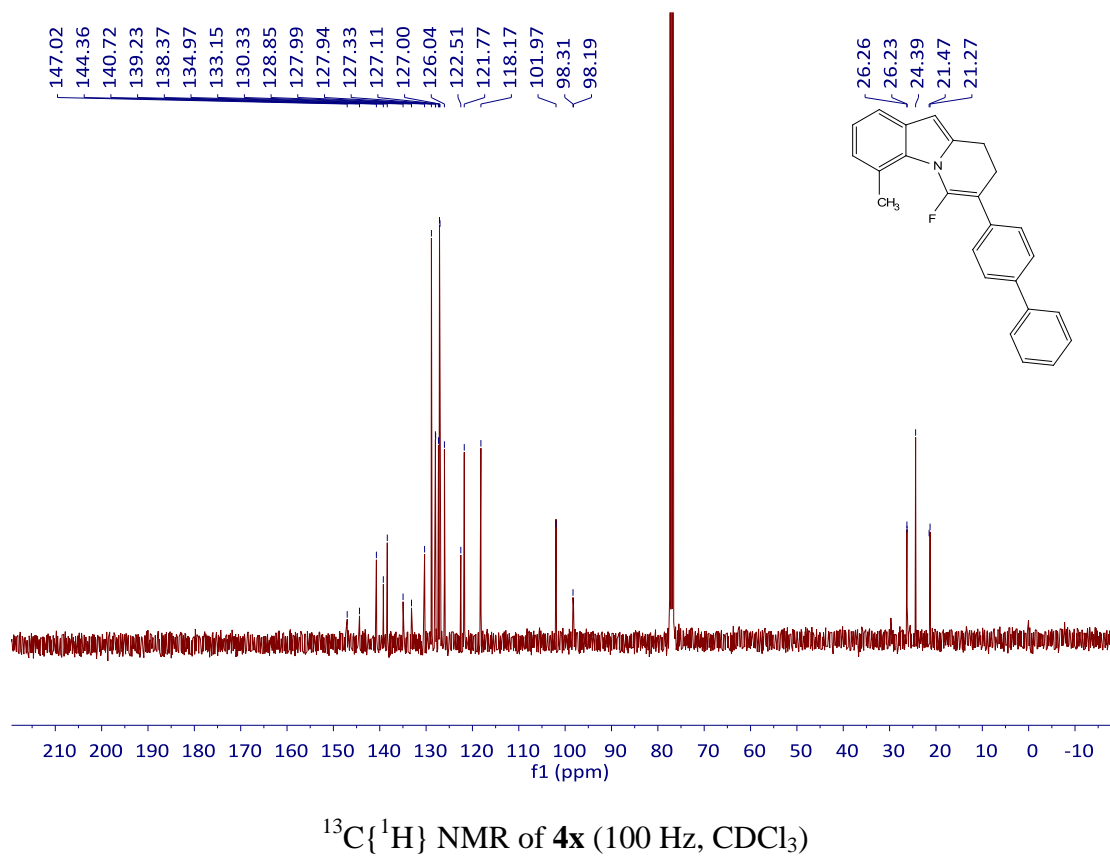

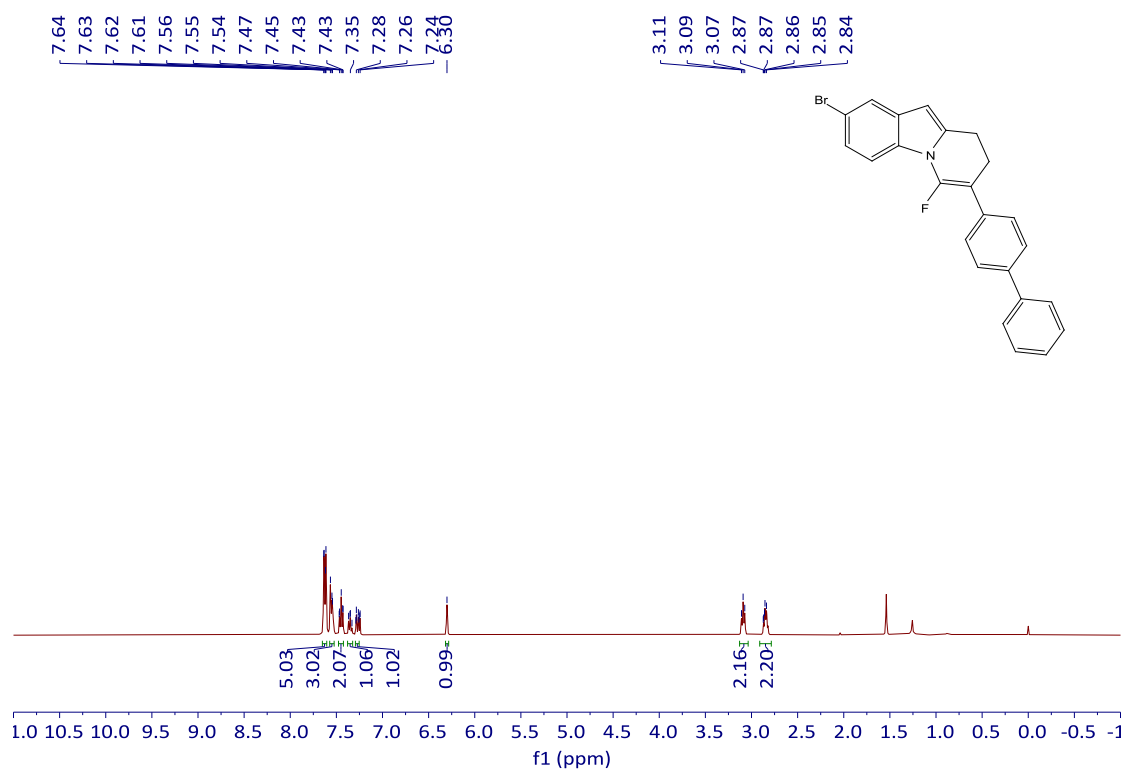

<sup>1</sup>H NMR of **4y** (400 Hz, CDCl<sub>3</sub>)

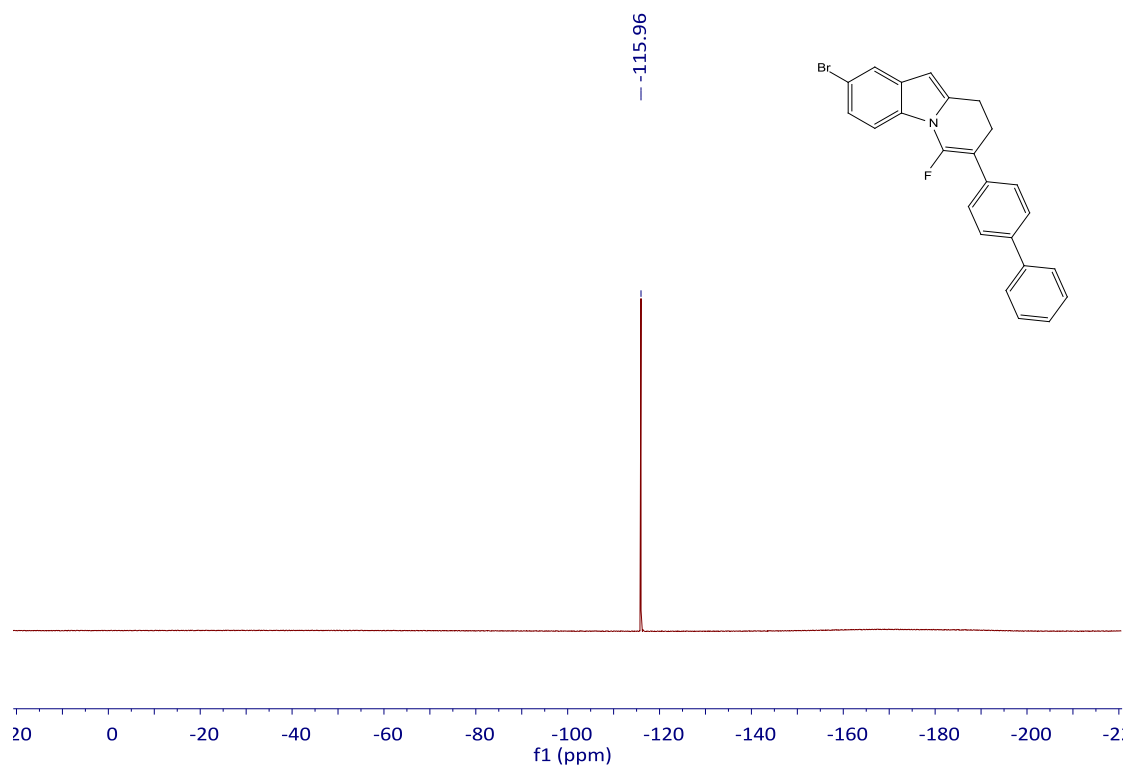

<sup>19</sup>F NMR of **4y** (376 Hz, CDCl<sub>3</sub>)

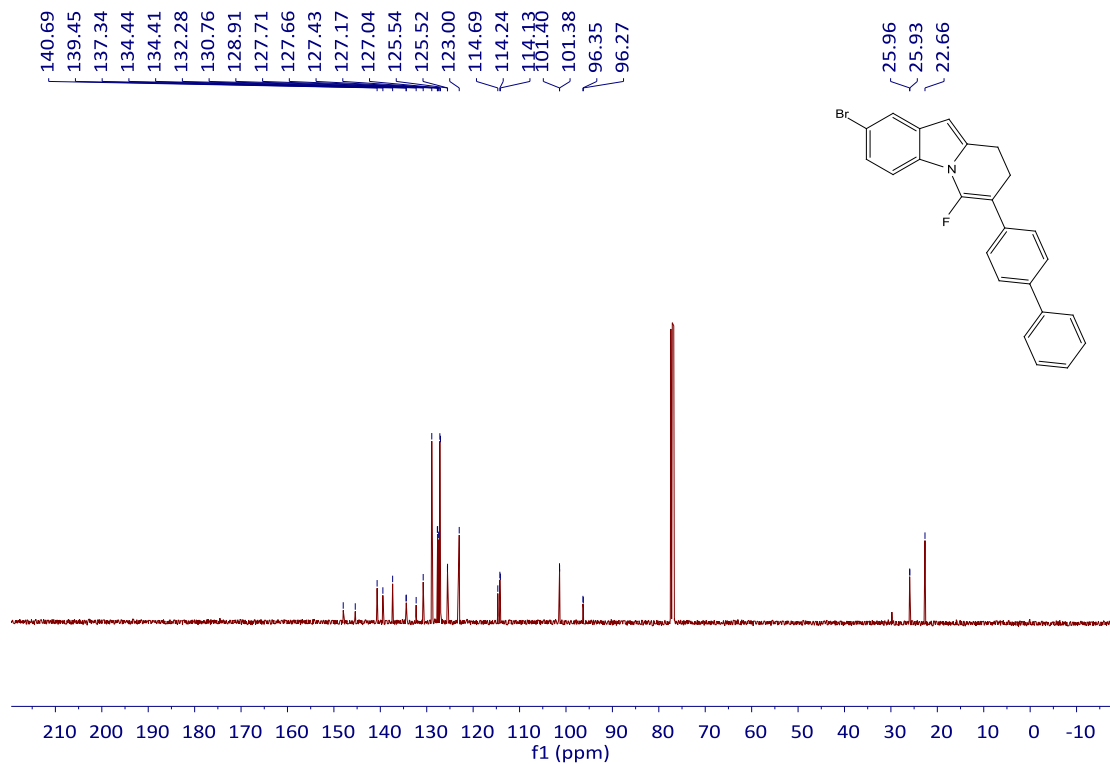

<sup>13</sup>C{<sup>1</sup>H} NMR of **4y** (100 Hz, CDCl<sub>3</sub>)

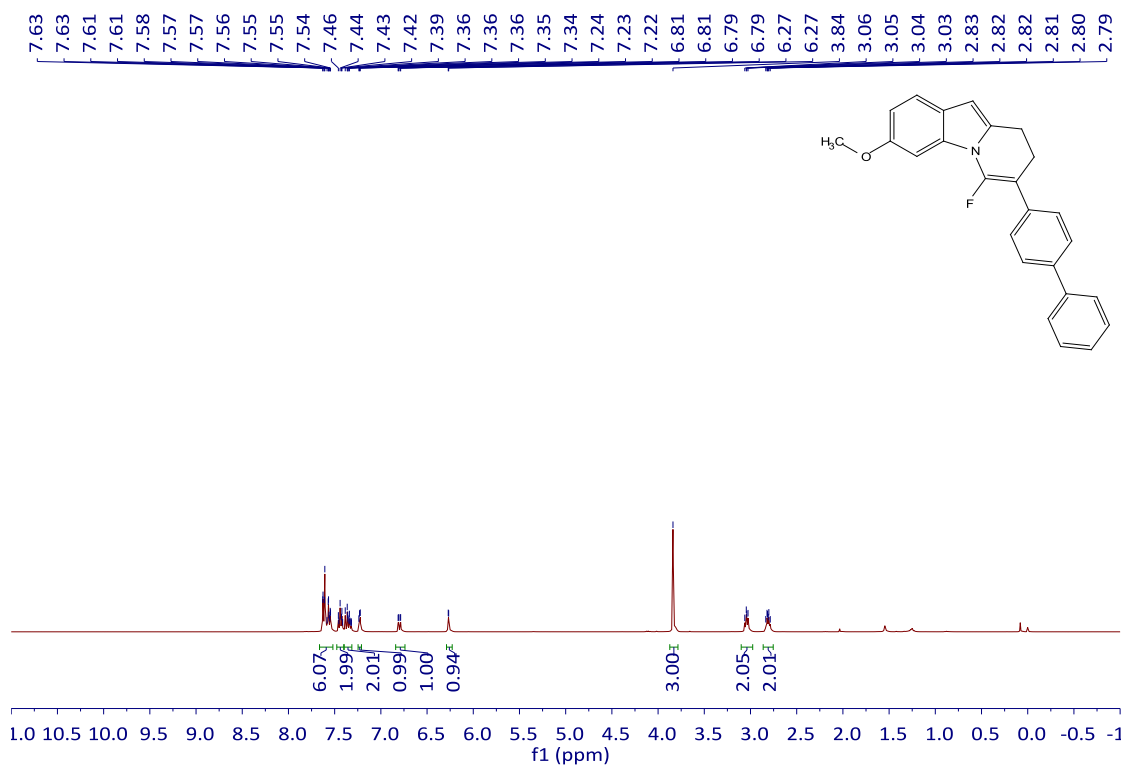

<sup>1</sup>H NMR of **4z** (400 Hz, CDCl<sub>3</sub>)

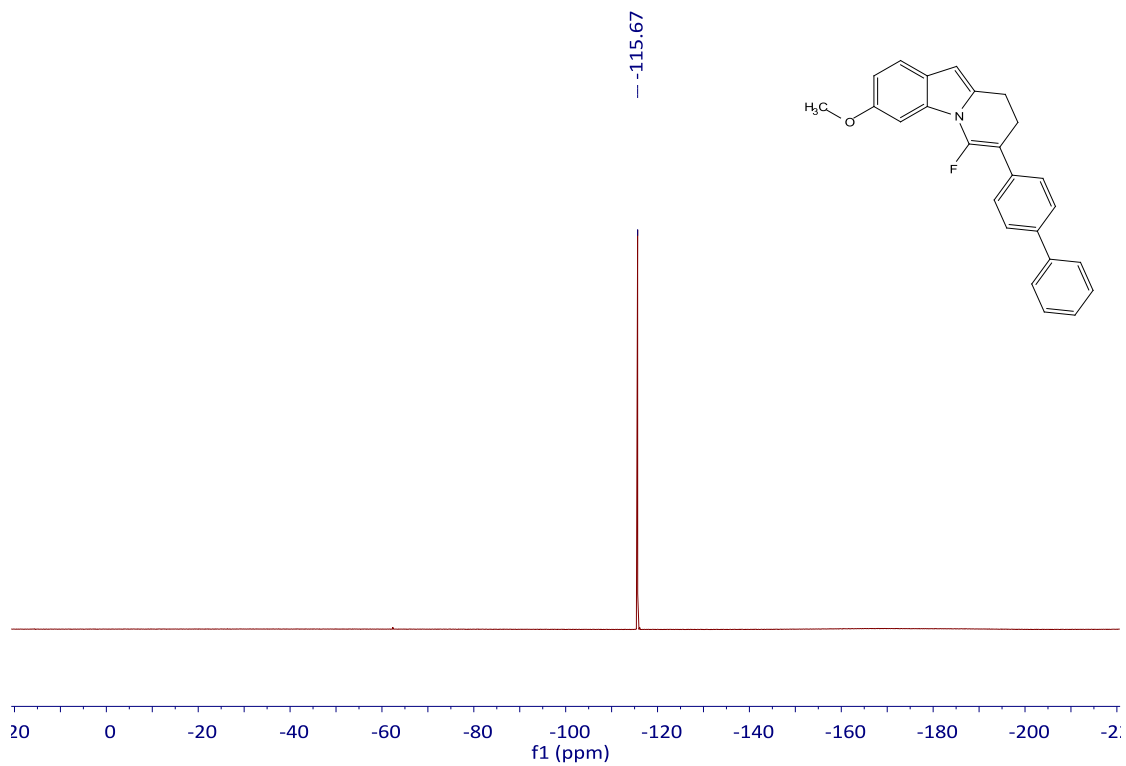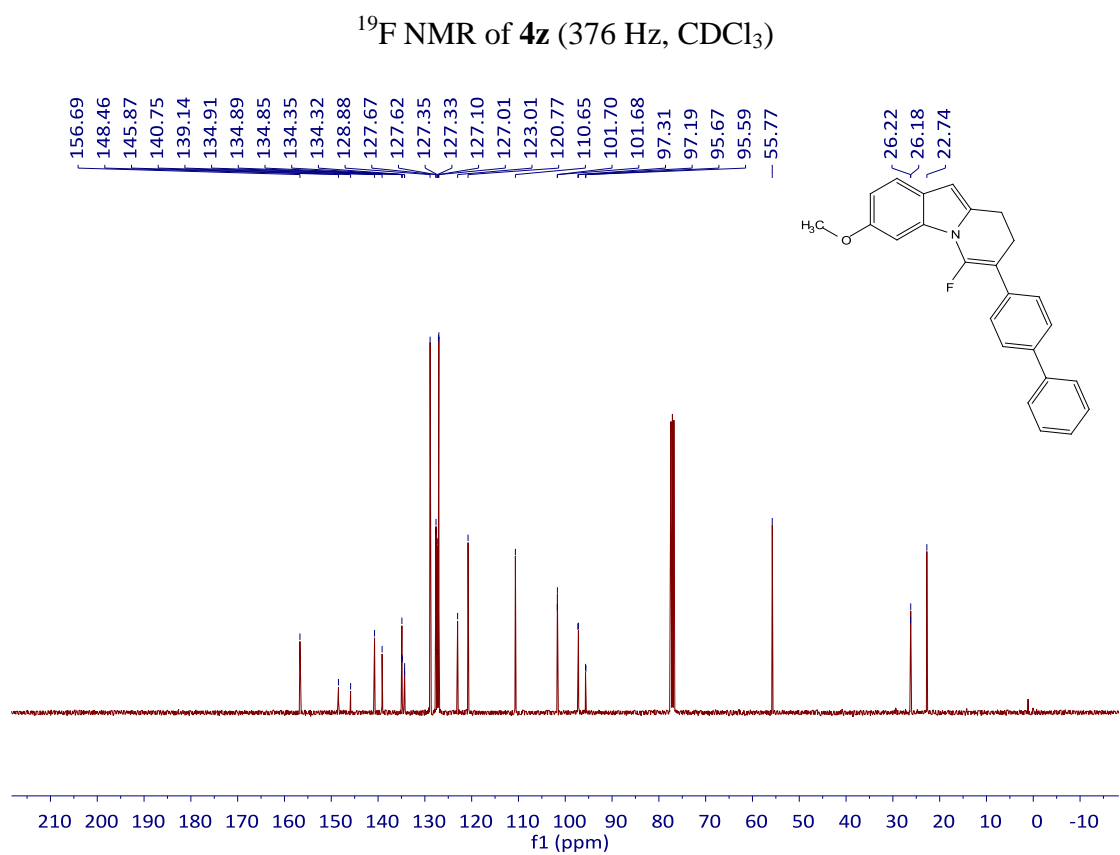

$^{13}\text{C}\{^1\text{H}\}$  NMR of **4z** (100 Hz,  $\text{CDCl}_3$ )



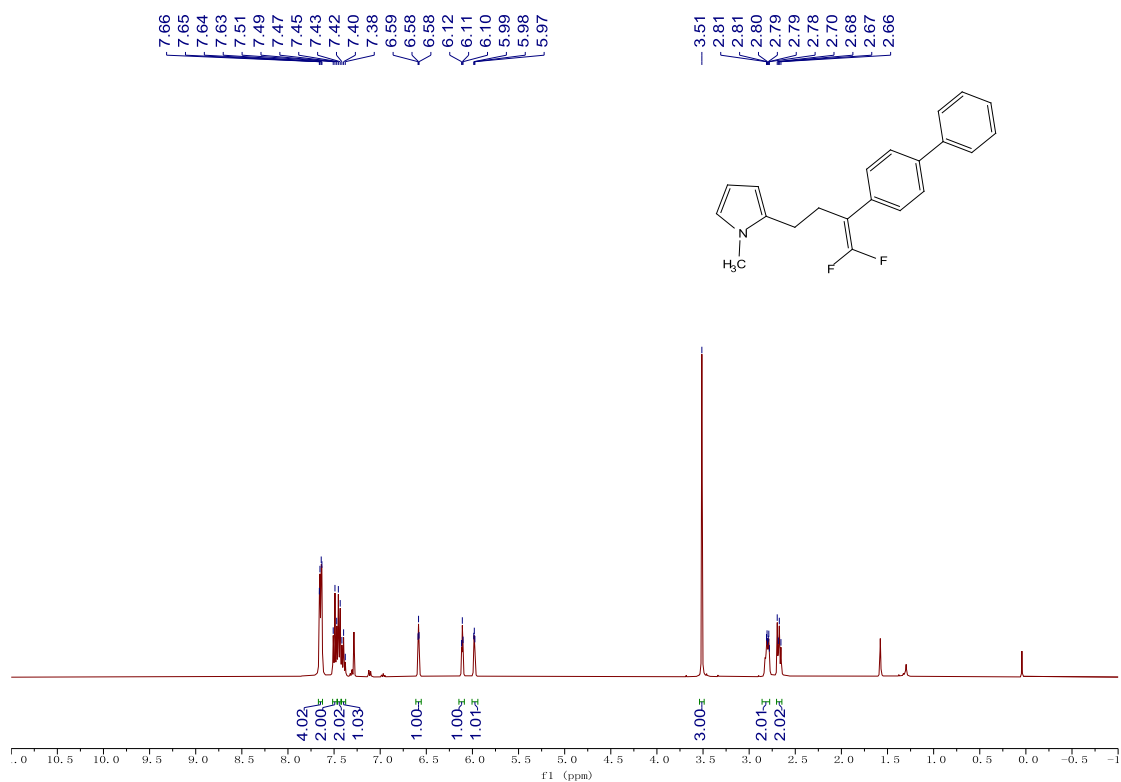

<sup>1</sup>H NMR of **6** (400 Hz, CDCl<sub>3</sub>)

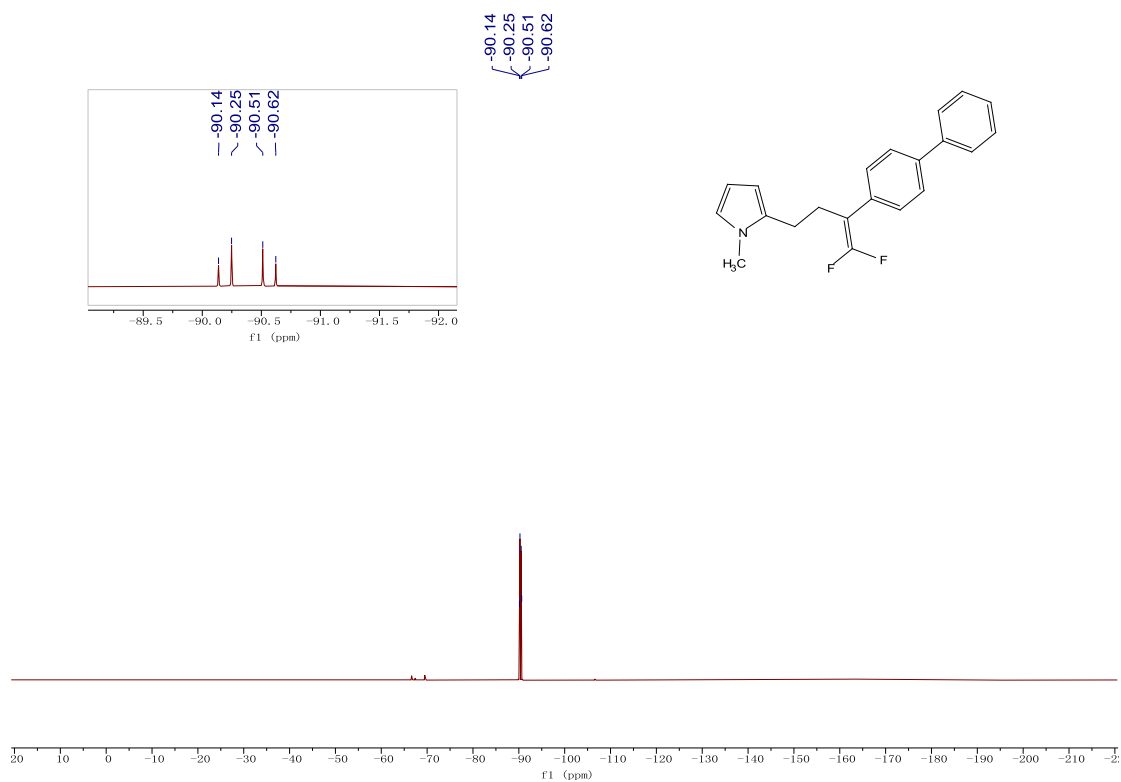

<sup>19</sup>F NMR of **6** (376 Hz, CDCl<sub>3</sub>)

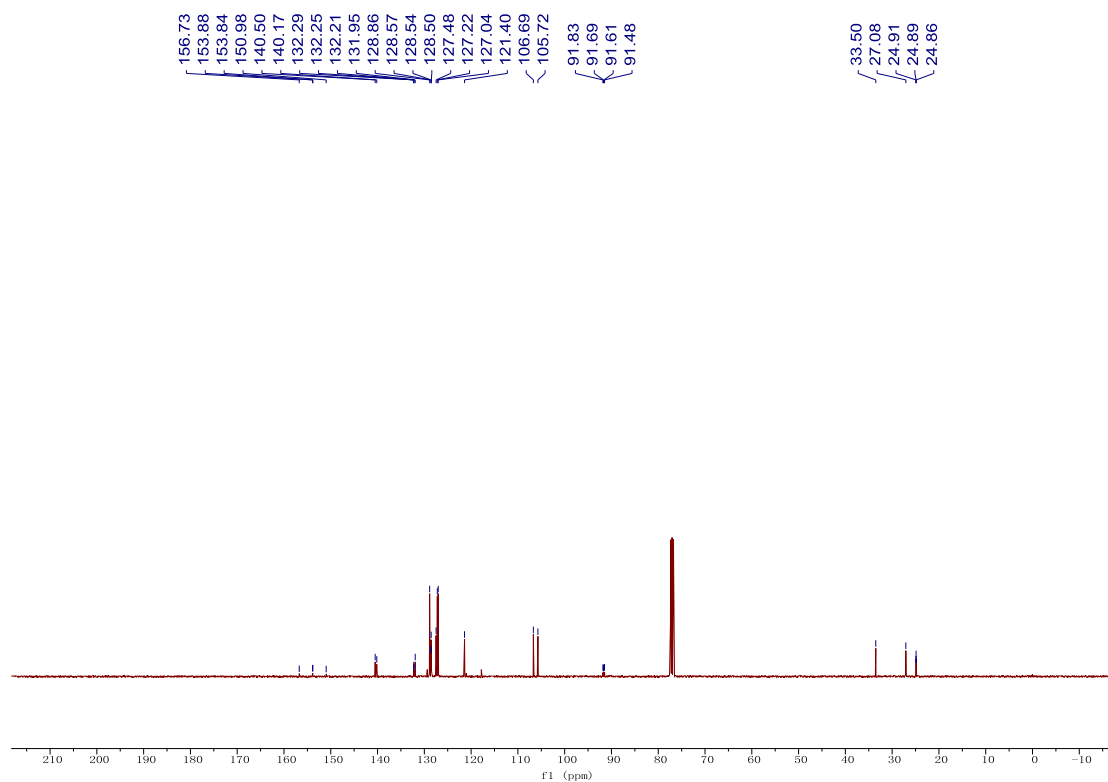

$^{13}\text{C}\{^1\text{H}\}$  NMR of **6** (100 Hz,  $\text{CDCl}_3$ )
